# Supplementary material for: Probiotic supplements and bone health in postmenopausal women: a meta-analysis of randomised controlled trials
Source: PubMed Central journal article supplement — BMJ Open. 2021 Mar 2;11(3):e041393. doi: 10.1136/bmjopen-2020-041393 (PMC7929795; doi:10.1136/bmjopen-2020-041393), 2021-03-02
Supplement: bmjopen-2020-041393.draft_revisions.pdf [file bmjopen-2020-041393.draft_revisions.pdf]

# BMJ Open

BMJ Open is committed to open peer review. As part of this commitment we make the peer review history of every article we publish publicly available.

When an article is published we post the peer reviewers' comments and the authors' responses online. We also post the versions of the paper that were used during peer review. These are the versions that the peer review comments apply to.

The versions of the paper that follow are the versions that were submitted during the peer review process. They are not the versions of record or the final published versions. They should not be cited or distributed as the published version of this manuscript.

BMJ Open is an open access journal and the full, final, typeset and author-corrected version of record of the manuscript is available on our site with no access controls, subscription charges or pay-per-view fees (<http://bmjopen.bmj.com>).

If you have any questions on BMJ Open's open peer review process please email [info.bmjopen@bmj.com](mailto:info.bmjopen@bmj.com)

# BMJ Open

## Probiotic supplements and bone health in postmenopausal women: a meta-analysis of randomized controlled trials

|                               |                                                                                                                                                                                                                                                                                                                                                                                                                                                                                                                                                                                                                                                                 |
|-------------------------------|-----------------------------------------------------------------------------------------------------------------------------------------------------------------------------------------------------------------------------------------------------------------------------------------------------------------------------------------------------------------------------------------------------------------------------------------------------------------------------------------------------------------------------------------------------------------------------------------------------------------------------------------------------------------|
| Journal:                      | <i>BMJ Open</i>                                                                                                                                                                                                                                                                                                                                                                                                                                                                                                                                                                                                                                                 |
| Manuscript ID                 | bmjopen-2020-041393                                                                                                                                                                                                                                                                                                                                                                                                                                                                                                                                                                                                                                             |
| Article Type:                 | Original research                                                                                                                                                                                                                                                                                                                                                                                                                                                                                                                                                                                                                                               |
| Date Submitted by the Author: | 09-Jun-2020                                                                                                                                                                                                                                                                                                                                                                                                                                                                                                                                                                                                                                                     |
| Complete List of Authors:     | Yu, Jiawei; Zhuji Affiliated Hospital of Wenzhou Medical University, Department of Orthopedic Surgery<br>Cao, Gaoyang; Zhejiang University School of Medicine Sir Run Run Shaw Hospital, Department of colorectal surgery<br>Yuan, Shuohui; Zhuji Affiliated Hospital of Wenzhou Medical University, Department of Orthopedic Surgery<br>Luo, Cong; Zhuji Affiliated Hospital of Wenzhou Medical University, Department of Orthopedic Surgery<br>Yu, Jiafeng; Zhuji Affiliated Hospital of Wenzhou Medical University, Department of Orthopedic Surgery<br>Cai, Ming; Zhuji Affiliated Hospital of Wenzhou Medical University, Department of Orthopedic Surgery |
| Keywords:                     | Bone diseases < ORTHOPAEDIC & TRAUMA SURGERY, Hip < ORTHOPAEDIC & TRAUMA SURGERY, Spine < ORTHOPAEDIC & TRAUMA SURGERY, NUTRITION & DIETETICS                                                                                                                                                                                                                                                                                                                                                                                                                                                                                                                   |
|                               |                                                                                                                                                                                                                                                                                                                                                                                                                                                                                                                                                                                                                                                                 |

SCHOLARONE™  
Manuscripts

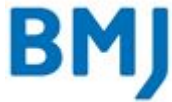

I, the Submitting Author has the right to grant and does grant on behalf of all authors of the Work (as defined in the below author licence), an exclusive licence and/or a non-exclusive licence for contributions from authors who are: i) UK Crown employees; ii) where BMJ has agreed a CC-BY licence shall apply, and/or iii) in accordance with the terms applicable for US Federal Government officers or employees acting as part of their official duties; on a worldwide, perpetual, irrevocable, royalty-free basis to BMJ Publishing Group Ltd ("BMJ") its licensees and where the relevant Journal is co-owned by BMJ to the co-owners of the Journal, to publish the Work in this journal and any other BMJ products and to exploit all rights, as set out in our [licence](#).

The Submitting Author accepts and understands that any supply made under these terms is made by BMJ to the Submitting Author unless you are acting as an employee on behalf of your employer or a postgraduate student of an affiliated institution which is paying any applicable article publishing charge ("APC") for Open Access articles. Where the Submitting Author wishes to make the Work available on an Open Access basis (and intends to pay the relevant APC), the terms of reuse of such Open Access shall be governed by a Creative Commons licence – details of these licences and which [Creative Commons](#) licence will apply to this Work are set out in our licence referred to above.

Other than as permitted in any relevant BMJ Author's Self Archiving Policies, I confirm this Work has not been accepted for publication elsewhere, is not being considered for publication elsewhere and does not duplicate material already published. I confirm all authors consent to publication of this Work and authorise the granting of this licence.

1  
2  
3  
4 1 **Probiotic supplements and bone health in postmenopausal**  
5  
6 2 **women: a meta-analysis of randomized controlled trials**  
7

8  
9 3 Jiawei Yu<sup>1,#</sup>, Gaoyang Cao<sup>2,#</sup>, Shuohui Yuan<sup>1</sup>, Cong Luo<sup>1</sup>, Jiafeng Yu<sup>1</sup>, Ming Cai<sup>1,\*</sup>  
10  
11 4

12  
13 5 <sup>1</sup> Department of Orthopedic Surgery , Zhuji Affiliated Hospital of Wenzhou Medical  
14  
15 6 University, Shaoxing, China

16  
17 7 <sup>2</sup> Department of colorectal surgery, Zhejiang University School of Medicine Sir Run Run  
18  
19 8 Shaw Hospital, Hangzhou, China  
20  
21 9

22  
23 10 \* Corresponding author. Department of Orthopedic Surgery, Zhuji Affiliated Hospital of  
24  
25 11 Wenzhou Medical University, Shaoxing, 311800, RP. China.

26  
27 12 E-mail address: caiming1208@163.com

28  
29 13 # J.W and G.C contributed equally to this work.  
30  
31 14  
32 15  
33 16  
34 17  
35 18  
36 19  
37 20  
38 21  
39 22  
40 23  
41 24  
42 25  
43 26  
44 27  
45 28  
46 29  
47  
48  
49  
50  
51  
52  
53  
54  
55  
56  
57  
58  
59  
60

## 30 **Abstract**

31 **Objective:** Osteoporosis is a common disease in postmenopausal women. Several  
32 studies have analyzed the associations between dietary supplement of probiotics and  
33 bone health in postmenopausal women, but the results are still controversial. We  
34 conducted this meta-analysis to assess the effects of probiotics supplement on bone  
35 mineral density (BMD) and bone turnover markers for postmenopausal women.

36 **Design:** systematic review and meta-analysis.

37 **Methods:** We systematically searched PubMed, EMBASE and the Cochrane Library  
38 from their inception to May 2019 for randomized controlled trials (RCTs) assessing  
39 probiotic supplements and osteoporosis in postmenopausal women. Study-specific  
40 risk estimates were combined using fixed-effect or random-effect models.

41 **Results:** Four RCTs (n = 218) were included. Probiotic supplements were associated  
42 with a significantly higher BMD in both hips (SMD (standardized mean difference) =  
43 0.37, 95% CI: 0.12–0.62) and lumbar spine (SMD = 0.28, 95% CI: 0.03–0.53) than in  
44 the control ( $P = 0.004, 0.029$  respectively). Collagen type 1 cross-linked  
45 C-telopeptide (CTX) levels in the treatment groups were significantly lower than  
46 those of the placebo group (SMD = -0.34, 95% CI: -0.60– 0.09). In subgroup  
47 meta-analysis, levels of bone-specific alkaline phosphatase (BALP), osteoprotegerin  
48 (OPG), osteocalcin (OC) and tumor necrosis factor (TNF) did not differ between the  
49 probiotic and placebo groups.

50 **Conclusions:** Supplementation with probiotics can increase lumbar and hip BMD,  
51 and reduce bone resorption. Probiotics retard osteoporosis in postmenopausal women.

## 53 **Strengths and limitations of this study**

54 1. We conduct a systematic review and meta-analysis of high-quality randomized  
55 controlled trials. We find probiotics could retard osteoporosis in postmenopausal  
56 women.

57 2. To our knowledge, this is the first meta-analysis describing the evidence of the  
58 association of probiotic supplements and bone status in postmenopausal women.

59 3. There is little heterogeneity between included articles and fixed-effects model used

1  
2  
3  
4 60 to calculate the results.

5 61 4. Only four randomized controlled trials satisfied our inclusion criteria. The limited  
6  
7 62 number of reports prevented us from conducting subgroup analysis. Furthermore,  
8  
9 63 insufficient number of estimates inflate the impact of the results of a particular study.  
10

11 64

12  
13 65 **Keywords:** probiotics supplement; bone mineral density; bone turnover markers;  
14  
15 66 postmenopausal; meta-analysis  
16

17 67

18  
19 68

20  
21 69

22  
23 70

24  
25 71

26  
27 72

28  
29 73

30  
31 74

32  
33 75

34  
35 76

36  
37 77

38  
39 78

40  
41 79

42  
43 80

44  
45 81

46  
47 82

48  
49 83

50  
51 84

52  
53 85

54  
55 86

56  
57 87

58  
59 88

60 89

## 90 Introduction

91 Osteoporosis is characterized by low bone mineral density (BMD) and deteriorated  
92 bone microstructure, leading to reduced bone strength and increased susceptibility to  
93 fractures <sup>1</sup>. Osteoporosis and fracture are particularly common in postmenopausal  
94 women, who experience a natural decline in endogenous estrogen, reducing BMD (on  
95 average 2%–5% BMD/y) <sup>2</sup> and leading to adverse effects on bone microarchitecture.

96 Currently, many medications are used in osteoporosis to decrease bone resorption  
97 or increase bone formation. Large randomized controlled trials (RCTs) showed that  
98 estrogen therapy was effective for the prevention and treatment of osteoporosis in  
99 postmenopausal women<sup>3-5</sup>. However, this remains controversial because of the  
100 increased risk of cancer, including endometrial, breast and ovarian cancer <sup>6</sup>.  
101 Nevertheless, other anti-resorptive agents are not widely used because of their  
102 side-effects, high prices and poor compliance on the part of patients; these include  
103 bisphosphonates, calcitonin and raloxifene. Therefore, complementary and dietary  
104 therapies are more acceptable to some patients. It was shown that calcium and vitamin  
105 D supplement effectively improved bone microarchitecture and health <sup>7</sup>; however,  
106 supplementation with calcium and vitamin alone is not sufficient to halt menopausal  
107 bone loss <sup>8</sup>.

108 Therefore, alternative ways to prevent and/or treat osteoporosis are sought.  
109 Probiotics are popular dietary therapies that have favorable effects on the skeletal  
110 system.<sup>9</sup> Probiotics are “live microorganisms that when administered in adequate  
111 amounts will confer a health benefit on the host” defined by the Food and Agricultural  
112 Organization/World Health Organization (FAO/WHO) <sup>10</sup>. They are affordable and  
113 have fewer side-effects.

114 To our knowledge, there has been no systematic review or meta-analysis of RCTs  
115 with probiotics in the treatment arms, analyzing the effect of probiotics in  
116 postmenopausal-related osteoporosis. Therefore, this systematic review and  
117 meta-analysis was performed to provide an overview of the effects of dietary  
118 probiotic supplements in postmenopausal related bone resorption in women and to  
119 inform researchers of new potential sources of bias to be addressed in future clinical

1  
2  
3  
4 120 trials.

5 121 **Methods and analysis**

6  
7 122 **Data sources and search strategies**

8  
9 123 A literature search of relevant studies was performed in PubMed, EMBASE and the  
10  
11 124 Cochrane Library. A comprehensive search strategy was developed. The key words  
12  
13 125 were as follows: ‘probiotics,’ ‘bone,’ ‘osteoporosis,’ ‘osteopenia,’ ‘bone mineral  
14  
15 126 density,’ ‘bone turnover,’ ‘menopause,’ ‘postmenopausal,’ and ‘post-menopause.’  
16  
17 127 References of retrieved articles were also scanned to identify and additional relevant  
18  
19 128 studies. Two independent reviewers (Jiawei Yu and Gaoyang Cao) conducted this  
20  
21 129 work. Discrepancies were resolved by consensus of the two reviewers. If required,  
22  
23 130 final disposition was determined by Ming Cai.

24  
25 131 **Inclusion and exclusion criteria**

26  
27 132 Inclusion criteria are as follows: (1) randomized controlled trials; (2) consideration  
28  
29 133 of dietary probiotic supplement as baseline exposure, and bone status (BMD and bone  
30  
31 134 turnover markers) as outcomes; (3) postmenopausal women administered probiotics  
32  
33 135 for more than 6 months; and (4) English language original articles indexed up to May  
34  
35 136 2020.

36  
37 137 Exclusion criteria are as follows: (1) absence of key data for meta-analysis; and (2)  
38  
39 138 low-quality articles according to Cochrane checklist.

40  
41 139 **Data extraction and quality assessment**

42  
43 140 The characteristics of the relevant articles were extracted and recorded  
44  
45 141 independently by two reviewers (Jiawei Yu and Gaoyang Cao) as follows: first  
46  
47 142 author’s name, year, area, age (mean or range), type of probiotic supplement, dose  
48  
49 143 design, course of treatment, number of cases, number of controls, and bone status (as  
50  
51 144 shown in Table 1). The Cochrane Collaboration’s tool <sup>11</sup> was used for assessing risk  
52  
53 145 of bias, and results were displayed as low risk, unclear risk or high risk of bias.

54  
55 146 **Statistical analysis**

56  
57 147 Meta-regression was conducted to verify whether different types of probiotic  
58  
59 148 supplement would introduce sources of heterogeneity. The mean relative change from  
60  
149 baseline to the end of course and standard deviation (SD) were used to express the



1  
2  
3  
4 150 effect of probiotic supplement on bone status in postmenopausal women. If the  
5  
6 151 original studies did not provide the mean relative change and standard deviation, we  
7  
8 152 converted the data using a common method<sup>12-13</sup>. The pooled effects of included  
9  
10 153 studies were expressed in terms of standardized mean difference (SMD) with 95%  
11  
12 154 confidence interval (CI). Q test and  $I^2$  index were used to evaluate heterogeneity  
13  
14 155 among the included results. If the Q test and  $I^2$  index did not show heterogeneity ( $P >$   
15  
16 156 0.05 and  $I^2 \leq 50\%$ ), a fixed-effects model was used; otherwise, a random-effects model  
17  
18 157 was used. Forest plots and funnel plots were produced and publication bias was tested  
19  
20 158 using Begg's test and the weighted Egger test<sup>14-15</sup>. Sensitivity analysis was conducted  
21  
22 159 to verify the impact of each individual study on the pooled results. All analysis was  
23  
24 160 performed using STATA 12.0 (StataCorp LP, College Station, TX, USA).

## 161 **Results**

### 162 **Search results and characteristics of identified studies**

163 A total of 524 articles were identified from the initial search in PubMed and  
164 EMBASE, 468 articles were removed because of no relevance to the topic. Then, 8  
165 articles were retained after reviewing the abstract according to the exclusion criteria.  
166 Finally, 4 randomized controlled trials<sup>16-19</sup> satisfied the inclusion criteria and entered  
167 this meta-analysis after full-text review. A detailed overview of the selection process  
168 is outlined in Figure 1.

169 A total of 218 postmenopausal women completed these trials. Among the four  
170 trials, half of the trials were conducted in Asia (one in Japan<sup>16</sup>, the other in Iran<sup>18</sup>),  
171 and the other two trials were in Europe (one in Sweden<sup>17</sup>, the other in Denmark<sup>19</sup>).  
172 All trials were randomized with the double-blinded method. Each trial identified the  
173 type of probiotic supplements used and described the dosage design. Three studies  
174 had treatment with probiotics only<sup>16-18</sup>, while another study included treatment with  
175 combined isoflavone and probiotics<sup>19</sup>. All studies provided BMD data from DXA  
176 scans at the lumbar spine and total hip. Collagen type 1 cross-linked C-telopeptide  
177 (CTX), bone-specific alkaline phosphatase (BALP), osteoprotegerin (OPG),  
178 osteocalcin (OC) and tumor necrosis factor (TNF) were used as bone turnover  
179 markers. Details of the characteristics are displayed in Table 1.

## 180 **Probiotics supplements and total hip BMD**

181 Overall, four estimates of the association between probiotics supplement and hip  
182 BMD were included in the meta-analysis. The results of meta-regression revealed that  
183 various types of probiotics were not a source of heterogeneity ( $P = 0.927$ ). Therefore,  
184 we brought the four estimates into the pooled analysis. We found that probiotic  
185 supplements gave higher hip BMD of the supplementary group than did the placebo  
186 group (SMD = 0.37, 95% CI: 0.12–0.62), with no heterogeneity ( $P = 0.404$ ;  $I^2 = 0.0$ )  
187 (Figure 2). The funnel plot is shown in Supplementary Figure 1a; it was symmetrical,  
188 excluding publication bias (Begg's test  $z_c = 1.02$ ,  $P = 0.308$ ; Egger's test  $t = -1.42$ ,  $P =$   
189  $0.291$ ). Sensitivity analyses indicated that the positive result was affected by the  
190 Lambert trial<sup>19</sup> (Supplementary Figure 2a).

## 191 **Probiotic supplements and lumbar spine BMD**

192 A total of four estimates were included in the meta-analysis. The results of  
193 meta-regression also showed no source of heterogeneity from various types of  
194 probiotics ( $P = 0.813$ ). Therefore, the four estimates were incorporated into the  
195 pooled analysis. Compared to the placebo group, the lumbar spine BMD level of the  
196 supplementary group was higher (SMD = 0.28, 95% CI: 0.03–0.53), with no  
197 heterogeneity ( $P = 0.661$ ;  $I^2 = 0.0$ ) (Figure 3). The funnel plot was symmetrical  
198 (Supplementary Figure 1b) and excluded publication bias (Begg's test  $z_c = 1.02$ ,  $P =$   
199  $0.308$ ; Egger's test  $t = -2.07$ ,  $P = 0.174$ ). Sensitivity analyses indicated that the  
200 positive result was affected by the Takimoto<sup>16</sup> and Lambert trials<sup>19</sup> (Supplementary  
201 Figure 2b).

## 202 **Probiotic supplements and bone turnover markers**

203 Four estimates of CTX, and two estimates of BALP, OPG, OC and TNF were  
204 incorporated into the pooled analysis. The results suggested that probiotic  
205 supplements help decrease body CTX level of the supplementary group when  
206 compared with the placebo group (SMD = -0.34, 95% CI: -0.60 – -0.09), with  
207 substantial heterogeneity. There was no evidence that probiotic supplements were  
208 associated with the levels of BALP, OPG, OC and TNF (Figure 4).

## 209 **Discussion**

1  
2  
3  
4 210 This meta-analysis provides evidence that dietary probiotics supplement can slow  
5  
6 211 bone resorption in postmenopausal women. Daily supplementation with probiotics for  
7  
8 212 24 weeks to 12 months significantly decreased levels of bone turnover marker CTX  
9  
10 213 (compared to placebo) in postmenopausal women. BMD loss at total hip and lumbar  
11  
12 214 spine was significantly lower in the treatment group.

13  
14 215 Bone loss occurs throughout life following maturation, and is accelerated following  
15  
16 216 menopause in women <sup>20</sup>. Postmenopausal women have an increased risk of fragility  
17  
18 217 fractures. Using a naturally-occurring bacterium to significantly reduce the annual  
19  
20 218 bone loss in this group of patients is a new concept that could lead to a paradigm shift  
21  
22 219 in osteoporosis prevention. Previous studies in rodents have demonstrated that  
23  
24 220 supplementation with specific bacterial strains decreased bone loss and improved  
25  
26 221 bone mineral density <sup>21-23</sup>. Kim et al. reported that the administration of *Lactobacillus*  
27  
28 222 *casei* 393 significantly increased BMD in ovariectomized rats <sup>24</sup>. For the first time, the  
29  
30 223 present meta-analysis systemically demonstrated that this probiotic also works in  
31  
32 224 humans.

33  
34 225 The vertebrae and metaphyses of long bones, rich in trabecular bone, have a higher  
35  
36 226 turnover rate than do cortical bones in the axis of long bones. Therefore, medications  
37  
38 227 and diseases affecting lumbar spine and hip are identified earlier than in other skeletal  
39  
40 228 segments <sup>25</sup>. The vertebrae and hips are easily accessible for measuring BMD.  
41  
42 229 Therefore, the lumbar spine and hip BMD were suitable primary outcome variables in  
43  
44 230 the present studies. McCabe et al. <sup>26</sup> showed that oral administration of *Lactobacillus*  
45  
46 231 probiotics identified a 45% increase in hip and vertebral trabecular bone volume  
47  
48 232 fraction in male mice. In another study, the administration of *Lactobacillus plantarum*  
49  
50 233 and *Lactobacillus paracasei* to ovariectomized mice showed increased trabecular  
51  
52 234 number compared to sham-ovariectomized control groups <sup>27</sup>. Our meta-analysis  
53  
54 235 showed, in the probiotics group, both total hip and lumbar vertebrae BMD were at a  
55  
56 236 significantly high levels than those of the control.

57  
58 237 Because BMD depends on the dynamic balance of bone formation and resorption,  
59  
60 238 bone turnover markers are also very important parameters analyzed in our  
239 meta-analysis. The measurement of CTX has been taken as a marker of bone

1  
2  
3  
4 240 resorption; it is produced by osteoclasts during bone resorption <sup>28</sup>. Therefore, the  
5  
6 241 increased levels of serum CTX indicated increased bone resorption. Subgroup  
7  
8 242 included 3 RCT studies, suggesting that ingestion of probiotic supplements  
9  
10 243 significantly reduced the bone resorption marker CTX. Another study from Japan <sup>16</sup>  
11  
12 244 showed that the probiotics group had significantly lower uNTx (urinary type I  
13  
14 245 collagen cross-linked N-telopeptide) levels than did the placebo group at 12 weeks of  
15  
16 246 treatment. uNTx is another fragment of type I collagen generated during resorption  
17  
18 247 detected in urine; therefore, this also suggested that probiotics inhibit bone resorption  
19  
20 248 by suppressing osteoclast activity. BALP is another well-known bone turnover  
21  
22 249 marker, an indicator of osteoblast proliferation that is thought to be a marker of bone  
23  
24 250 formation <sup>29</sup>. However, the present meta-analysis showed no significant changes in  
25  
26 251 BALP. Similarly, no differences were detected in levels of biochemical markers for  
27  
28 252 bone metabolic indices (OPG, OC).

29 253 Probiotics have many functional properties in humans. They function in the  
30  
31 254 gastrointestinal system by modifying the microbiota composition, intestinal barrier  
32  
33 255 function, and the immune system which feeds back systemic benefits to the host,  
34  
35 256 including bone health. Some can be used in intestinal infections and treatment of  
36  
37 257 diarrhea, because they not only tolerate low PH environment but also colonize the  
38  
39 258 human colon, adhering to the gastrointestinal tract, with antimicrobial effects <sup>30</sup>.  
40  
41 259 Moreover, probiotic function modifying physiological homeostasis of the intestinal  
42  
43 260 flora can also benefit bone metabolism <sup>31</sup>. Many studies have looked at changes of  
44  
45 261 gastrointestinal flora during aging, which may alter mineral absorption.  
46  
47 262 Gastrointestinal inflammation and systemic inflammation are closed related to  
48  
49 263 enhanced generation of potent osteoclastogenic cytokines as the main cause of bone  
50  
51 264 loss <sup>32-33</sup>. Probiotics can restore balance of the gut microbiota, preventing or  
52  
53 265 moderating gut and systemic inflammation and allowing absorption of nutrients,  
54  
55 266 especially in elderly people <sup>34</sup>. Probiotics may restore microbiota composition through  
56  
57 267 several mechanisms. They act in the gastrointestinal tract simply by proliferation, as  
58  
59 268 well as by ability inhibiting other flora. Furthermore, probiotics turn complex  
60  
269 carbohydrates to oligosaccharides <sup>35</sup>, which can be used by other bacteria, indirectly

1  
2  
3  
4 270 improving the balance of microflora. Furthermore, probiotics decrease the levels of  
5  
6 271 inflammatory mediators and cytokines in the gut and bone marrow <sup>36</sup>. These changes  
7  
8 272 give signals to bone cells, including osteoblasts, osteoclasts and stem cells,  
9  
10 273 significantly affecting bone homeostasis. Endocrine factors (such as serotonin and  
11  
12 274 incretins) secreted by intestine also remarkably affect bone cells <sup>37</sup>.

13  
14 275 Anti-inflammatory effects are among the underlying mechanisms by which  
15  
16 276 probiotics benefit bone metabolism. There is evidence that arginine deiminase,  
17  
18 277 produced by the probiotic *Lactobacillus brevis* CD2, has an anti-inflammatory effect  
19  
20 278 <sup>38</sup>. Supplementation of probiotics may reduce expression of pro-inflammatory and  
21  
22 279 osteolytic cytokines, including TNF- $\alpha$ . These cytokines alter anti-osteoclastogenic  
23  
24 280 cytokine expression, leading to enhanced osteoclast formation and inhibited osteoblast  
25  
26 281 activity <sup>39</sup>. Some studies found that probiotic supplementation reduces TNF $\alpha$ , IL-17,  
27  
28 282 and RANKL expression levels in ovariectomized mice <sup>40</sup>. These changes give signals  
29  
30 283 to bone cells, such as osteoblasts, osteoclasts and stem cells, which significantly affect  
31  
32 284 bone homeostasis. In this meta-analysis, TNF- $\alpha$  was reported by two RCTs. One  
33  
34 285 reported <sup>17</sup> that serum levels of TNF- $\alpha$  were significantly lower in the probiotic-treated  
35  
36 286 group; however, another study <sup>18</sup> showed there was no differences between probiotic  
37  
38 287 and control groups. More clinical trials are needed in the future to elucidate the  
39  
40 288 relationship between administration of probiotics and anti-inflammatory effects.

41  
42 289 Our study has some limitations. First, only four randomized controlled trials  
43  
44 290 satisfied our inclusion criteria. The limited number of reports focusing on the  
45  
46 291 association between probiotic supplement and BMD and bone turnover markers  
47  
48 292 prevented us from conducting subgroup analysis and drawing conclusive summaries.  
49  
50 293 Furthermore, insufficient number of estimates inflate the impact of the results of a  
51  
52 294 particular study. Second, although, meta-regression was used to determine that  
53  
54 295 various types of probiotic supplement did not have an impact on the pooled results,  
55  
56 296 dosage design and course of treatment could also introduce bias. Third, in Lambert's  
57  
58 297 study <sup>19</sup>, probiotics plus soflavones were used as a treatment regimen, rather than  
59  
60 298 probiotics alone. This may cause some bias; however, we did not want to ignore this  
299 valuable study. Third, the units describing BMD change were inconsistent among the

1  
2  
3  
4 300 four reports. Nilsson's study <sup>17</sup> applied T score to describe BMD change, while other  
5  
6 301 three studies used g/cm<sup>2</sup> instead. We could only calculate SMD rather than weighted  
7  
8 302 mean difference (WMD). Thus, our results of meta-analysis should be interpreted  
9  
10 303 with caution.

11 304 Our research also has some strengths. First, to our knowledge, this is the first  
12  
13 305 meta-analysis describing the evidence of the association of probiotic supplements and  
14  
15 306 bone status in postmenopausal women. Second, there is little heterogeneity between  
16  
17 307 included articles and fixed-effects model used to calculate the results. Third, all  
18  
19 308 included randomized controlled trials were of high quality for analysis.

### 21 309 **Conclusion**

22  
23 310 Our systematic review and meta-analysis showed that probiotic supplementations in  
24  
25 311 postmenopausal women were associated with preserving BMD and attenuating bone  
26  
27 312 resorption. Appropriate supplement of probiotic could be recommended to improve  
28  
29 313 bone status in postmenopausal women.

30  
31 314

### 33 315 **Author affiliations**

34  
35 316 <sup>1</sup> Department of Orthopedic Surgery , Zhuji Affiliated Hospital of Wenzhou Medical  
36  
37 317 University, Shaoxing, China

38  
39 318 <sup>2</sup> Department of colorectal surgery, Zhejiang University School of Medicine Sir Run Run  
40  
41 319 Shaw Hospital, Hangzhou, China

### 42 320 **Acknowledgments**

43  
44 321 The authors thank researchers of the included articles for information relevant to the  
45  
46 322 analysis

### 48 323 **Contributors**

49  
50 324 M Cai and J Yu conceived and designed the meta analysis; J Wu, G Cao, S Yuan and  
51  
52 325 Cong Luo searched the literature; J Yu, G Cao, and S Yuan analysed the data; X Cai  
53  
54 326 contributed analysis tools; J Yu and G Cao wrote the paper; X Cai and M Cai revised  
55  
56 327 the manuscript.

### 58 328 **Funding**

59  
60 329 None

1  
2  
3  
4  
5  
6  
7  
8  
9  
10  
11  
12  
13  
14  
15  
16  
17  
18  
19  
20  
21  
22  
23  
24  
25  
26  
27  
28  
29  
30  
31  
32  
33  
34  
35  
36  
37  
38  
39  
40  
41  
42  
43  
44  
45  
46  
47  
48  
49  
50  
51  
52  
53  
54  
55  
56  
57  
58  
59  
60

330 **Competing interests**

331 The authors declare no conflicts of interest. This study does not contain human  
332 participants or animals.

333 **Patient consent for publication**

334 Not required

335 **Provenance and peer review**

336 Not commissioned; externally peer reviewed

337 **Data availability statement**

338 All data relevant to the study are included in the article or uploaded as supplementary  
339 information. No additional data available.

340 **Patient and public involvement**

341 No patient involved

342

343

344

345

346

347

348

349

350

351

352

353

354

355

356

357

358

359



## References

1. John A. Kanis. Diagnosis of osteoporosis and assessment of fracture risk. *The Lancet* 2002;359(9321):1929-36. doi: 10.1016/S0140-6736(02)08101-1.
2. J. S. Finkelstein, S. E. Brockwell, V. Mehta, et al. Bone mineral density changes during the menopause transition in a multiethnic cohort of women. *J Clin Endocrinol Metab* 2008;93(3):861-68. doi: 10.1210/jc.2007-1876 pmid:181604672008-03-01].
3. J. Chen, X. Liu. [Effects on blood fat and bone density of postmenopausal women fed by soy protein with isoflavone]. *Zhonghua Yi Xue Za Zhi* 2014;94(3):215-17. pmid:247314672014-01-21].
4. P. B. Clifton-Bligh, M. L. Nery, R. J. Clifton-Bligh, et al. Red clover isoflavones enriched with formononetin lower serum LDL cholesterol-a randomized, double-blind, placebo-controlled study. *EUR J CLIN NUTR* 2015;69(1):134-42. doi: 10.1038/ejcn.2014.207 pmid:253698312015-01-01].
5. A. C. Thorup, M. N. Lambert, H. S. Kahr, M. Bjerre, P. B. Jeppesen. Intake of Novel Red Clover Supplementation for 12 Weeks Improves Bone Status in Healthy Menopausal Women. *Evid Based Complement Alternat Med* 2015;2015:689138. doi: 10.1155/2015/689138 pmid:262659262015-01-20].
6. J. Simin, R. Tamimi, J. Lagergren, H. O. Adami, N. Brusselaers. Menopausal hormone therapy and cancer risk: An overestimated risk? *EUR J CANCER* 2017;84:60-68. doi: 10.1016/j.ejca.2017.07.012 pmid:28783542.[Copyright (c) 2017 Elsevier Ltd. All rights reserved.:\*2017-10-01].
7. S. Boonen, D. Vanderschueren, P. Haentjens, P. Lips. Calcium and vitamin D in the prevention and treatment of osteoporosis - a clinical update. *J INTERN MED* 2006;259(6):539-52. doi: 10.1111/j.1365-2796.2006.01655.x pmid:167045542006-06-01].
8. S. Gonnelli, C. Cepollaro, C. Pondrelli, et al. Bone turnover and the response to alendronate treatment in postmenopausal osteoporosis. *Calcif Tissue Int* 1999;65(5):359-64. pmid:105417601999-11-01].
9. M. M. Zaiss, R. M. Jones, G. Schett, R. Pacifici. The gut-bone axis: how bacterial metabolites bridge the distance. *J CLIN INVEST* 2019;129(8):3018-28. doi: 10.1172/JCI128521 pmid:313052652019-07-15].
10. Food And Agriculture Organization Organization. Guidelines for the Evaluation of Probiotics in Food: Report of a Joint FAO/WHO Working Group. In. Ontario, Canada: Food and Agriculture Organization of the United Nations and World Health Organization, 2002.
11. Green S. Editors Higgins JPT. Cochrane Handbook for Systematic Reviews of Interventions Version 5.1.0 [updated March 2011]. In: The Cochrane Collaboration, 2011.
12. Pagano M. GK. Principles of Biostatistics. Second Edition, ed: Duxbury 2000.
13. L. Kaiser. Adjusting for baseline: change or percentage change? *STAT MED* 1989;8(10):1183-90. pmid:26829091989-10-01].
14. C. B. Begg, M. Mazumdar. Operating characteristics of a rank correlation test for publication bias. *BIOMETRICS* 1994;50(4):1088-101. pmid:77869901994-12-01].
15. M. Egger, G. D. Smith. Bias in location and selection of studies. *BMJ* 1998;316(7124):61-66. doi: 10.1136/bmj.316.7124.61 pmid:94512741998-01-03].
16. T. Takimoto, M. Hatanaka, T. Hoshino, et al. Effect of Bacillus subtilis C-3102 on bone mineral density in healthy postmenopausal Japanese women: a randomized, placebo-controlled,



- 1  
2  
3 403 double-blind clinical trial. *Biosci Microbiota Food Health* 2018;37(4):87-96. doi:  
4 404 10.12938/bmfh.18-006 pmid:303701922018-01-20].
- 5  
6 405 17. A. G. Nilsson, D. Sundh, F. Backhed, M. Lorentzon. Lactobacillus reuteri reduces bone loss in  
7 406 older women with low bone mineral density: a randomized, placebo-controlled, double-blind,  
8 407 clinical trial. *J INTERN MED* 2018;284(3):307-17. doi: 10.1111/joim.12805 pmid:29926979. [(c)  
9 408 2018 The Authors. Journal of Internal Medicine published by John Wiley & Sons  
10 409 Ltd on behalf of Association for Publication of The Journal of Internal  
11 410 Medicine.:\*2018-09-01].
- 12  
13 411 18. S. Jafarnejad, K. Djafarian, M. R. Fazeli, et al. Effects of a Multispecies Probiotic Supplement on  
14 412 Bone Health in Osteopenic Postmenopausal Women: A Randomized, Double-blind, Controlled  
15 413 Trial. *J AM COLL NUTR* 2017;36(7):497-506. doi: 10.1080/07315724.2017.1318724  
16 414 pmid:286283742017-09-01].
- 17  
18 415 19. MNT Lambert, C. B. Thybo, S. Lykkeboe, et al. Combined bioavailable isoflavones and  
19 416 probiotics improve bone status and estrogen metabolism in postmenopausal osteopenic women: a  
20 417 randomized controlled trial. *AM J CLIN NUTR* 2017;106(3):909-20. doi:  
21 418 10.3945/ajcn.117.153353 pmid:28768651. [(c) 2017 American Society for  
22 419 Nutrition.:\*2017-09-01].
- 23  
24 420 20. D. Bliuc, N. D. Nguyen, D. Alarkawi, et al. Accelerated bone loss and increased post-fracture  
25 421 mortality in elderly women and men. *Osteoporos Int* 2015;26(4):1331-39. doi:  
26 422 10.1007/s00198-014-3014-9 pmid:256004732015-04-01].
- 27  
28 423 21. C. Blanton. Bone Response to Dietary Co-Enrichment with Powdered Whole Grape and  
29 424 Probiotics. *NUTRIENTS* 2018;10(2) doi: 10.3390/nu10020146 pmid:293821392018-01-29].
- 30  
31 425 22. H. Kimoto-Nira, K. Mizumachi, T. Okamoto, K. Sasaki, J. Kurisaki. Influence of long-term  
32 426 consumption of a Lactococcus lactis strain on the intestinal immunity and intestinal flora of the  
33 427 senescence-accelerated mouse. *Br J Nutr* 2009;102(2):181-85. doi: 10.1017/S0007114508143574  
34 428 pmid:195865672009-07-01].
- 35  
36 429 23. F. L. Collins, N. D. Rios-Arce, J. D. Schepper, N. Parameswaran, L. R. McCabe. The Potential of  
37 430 Probiotics as a Therapy for Osteoporosis. *Microbiol Spectr* 2017;5(4) doi:  
38 431 10.1128/microbiolspec.BAD-0015-2016 pmid:288408192017-08-01].
- 39  
40 432 24. Jong Gun Kim, Eungsuk Lee, Sae Hun Kim, et al. Effects of a Lactobacillus casei 393 fermented  
41 433 milk product on bone metabolism in ovariectomised rats. *INT DAIRY J*  
42 434 2009;19(11):690-95.2009-01-01].
- 43  
44 435 25. Ego Seeman. Chapter 1 - Modeling and Remodeling: The Cellular Machinery Responsible for the  
45 436 Gain and Loss of Bone's Material and Structural Strength: Academic Press 2008:1-28.
- 46  
47 437 26. L. R. McCabe, R. Irwin, L. Schaefer, R. A. Britton. Probiotic use decreases intestinal  
48 438 inflammation and increases bone density in healthy male but not female mice. *J CELL PHYSIOL*  
49 439 2013;228(8):1793-98. doi: 10.1002/jcp.24340 pmid:23389860. [Copyright (c) 2013 Wiley  
50 440 Periodicals, Inc.:\*2013-08-01].
- 51  
52 441 27. K. Parvaneh, M. Ebrahimi, M. R. Sabran, et al. Probiotics (Bifidobacterium longum) Increase  
53 442 Bone Mass Density and Upregulate Sparc and Bmp-2 Genes in Rats with Bone Loss Resulting  
54 443 from Ovariectomy. *BIOMED RES INT* 2015;2015:897639. doi: 10.1155/2015/897639  
55 444 pmid:263664212015-01-20].
- 56  
57 445 28. P. Szulc, P. D. Delmas. Biochemical markers of bone turnover: potential use in the investigation  
58 446 and management of postmenopausal osteoporosis. *Osteoporos Int* 2008;19(12):1683-704. doi:

- 1  
2  
3 447 10.1007/s00198-008-0660-9 pmid:186295702008-12-01].
- 4 448 29. Katharina E. Scholz-Ahrens, Berit Adolphi, Florence Rochat, et al. Effects of probiotics,  
5 449 prebiotics, and synbiotics on mineral metabolism in ovariectomized rats — impact of bacterial  
6 450 mass, intestinal absorptive area and reduction of bone turn-over. *NFS Journal*  
7 451 2016;3:41-50.2016-01-01].
- 8 452 30. A. Guarino, Vecchio A. Lo, R. B. Canani. Probiotics as prevention and treatment for diarrhea.  
9 453 *Curr Opin Gastroenterol* 2009;25(1):18-23. doi: 10.1097/MOG.0b013e32831b4455  
10 454 pmid:191147702009-01-01].
- 11 455 31. V. Tremaroli, F. Backhed. Functional interactions between the gut microbiota and host  
12 456 metabolism. *NATURE* 2012;489(7415):242-49. doi: 10.1038/nature11552  
13 457 pmid:229722972012-09-13].
- 14 458 32. T. Ali, D. Lam, M. S. Bronze, M. B. Humphrey. Osteoporosis in inflammatory bowel disease. *AM*  
15 459 *JMED* 2009;122(7):599-604. doi: 10.1016/j.amjmed.2009.01.022 pmid:195591582009-07-01].
- 16 460 33. T. Ciucci, L. Ibanez, A. Boucoiran, et al. Bone marrow Th17 TNFalpha cells induce osteoclast  
17 461 differentiation, and link bone destruction to IBD. *GUT* 2015;64(7):1072-81. doi:  
18 462 10.1136/gutjnl-2014-306947 pmid:25298539.[Published by the BMJ Publishing Group Limited.  
19 463 For permission to use (where not  
20 464 already granted under a licence) please go to  
21 465 [http://group.bmj.com/group/rights-licensing/permissions.\\*2015-07-01](http://group.bmj.com/group/rights-licensing/permissions.*2015-07-01)].
- 22 466 34. P. Hemarajata, J. Versalovic. Effects of probiotics on gut microbiota: mechanisms of intestinal  
23 467 immunomodulation and neuromodulation. *Therap Adv Gastroenterol* 2013;6(1):39-51. doi:  
24 468 10.1177/1756283X12459294 pmid:233200492013-01-01].
- 25 469 35. H. J. Flint, K. P. Scott, S. H. Duncan, P. Louis, E. Forano. Microbial degradation of complex  
26 470 carbohydrates in the gut. *Gut Microbes* 2012;3(4):289-306. doi: 10.4161/gmic.19897  
27 471 pmid:225728752012-07-01].
- 28 472 36. Y. P. Lin, C. H. Thibodeaux, J. A. Pena, G. D. Ferry, J. Versalovic. Probiotic *Lactobacillus reuteri*  
29 473 suppress proinflammatory cytokines via c-Jun. *INFLAMM BOWEL DIS* 2008;14(8):1068-83. doi:  
30 474 10.1002/ibd.20448 pmid:184258022008-08-01].
- 31 475 37. V. Tremaroli, F. Backhed. Functional interactions between the gut microbiota and host  
32 476 metabolism. *NATURE* 2012;489(7415):242-49. doi: 10.1038/nature11552  
33 477 pmid:229722972012-09-13].
- 34 478 38. T. Maekawa, G. Hajishengallis. Topical treatment with probiotic *Lactobacillus brevis* CD2  
35 479 inhibits experimental periodontal inflammation and bone loss. *J PERIODONTAL RES*  
36 480 2014;49(6):785-91. doi: 10.1111/jre.12164 pmid:24483135.[(c) 2014 John Wiley & Sons A/S.  
37 481 Published by John Wiley & Sons Ltd.\*2014-12-01].
- 38 482 39. R. Irwin, T. Lee, V. B. Young, N. Parameswaran, L. R. McCabe. Colitis-induced bone loss is  
39 483 gender dependent and associated with increased inflammation. *INFLAMM BOWEL DIS*  
40 484 2013;19(8):1586-97. doi: 10.1097/MIB.0b013e318289e17b pmid:237028052013-07-01].
- 41 485 40. J. Y. Li, B. Chassaing, A. M. Tyagi, et al. Sex steroid deficiency-associated bone loss is  
42 486 microbiota dependent and prevented by probiotics. *J CLIN INVEST* 2016;126(6):2049-63. doi:  
43 487 10.1172/JCI86062 pmid:271112322016-06-01].
- 44  
45  
46  
47  
48  
49  
50  
51  
52  
53  
54  
55  
56  
57  
58  
59  
60

Table 1. Characteristics of included randomized controlled trials in the meta-analysis

| Study      | Year | Area    | Age (year)         | Blinding     | Type of probiotic supplement                  | Number of T | Number of P | Course of treatment (months) | dose design                      | Minerals intake                                  | BMD                 | BTM                             |
|------------|------|---------|--------------------|--------------|-----------------------------------------------|-------------|-------------|------------------------------|----------------------------------|--------------------------------------------------|---------------------|---------------------------------|
| TAKIMOTO   | 2018 | Japan   | T: 57.5<br>P: 57.8 | double-blind | bacillus subtilis C-3102                      | 31          | 30          | 6                            | 3.4×10 <sup>9</sup> CFU /d       | Estimated by BDHQ                                | hip<br>lumbar spine | CTX                             |
| Nilsson    | 2018 | Sweden  | T: 76.4<br>P: 76.3 | double-blind | lactobacillus reuteri 6475                    | 32          | 36          | 12                           | 5x10 <sup>9</sup> CFU twice/d    | Estimated by astandardize d questionnaire        | hip<br>lumbar spine | CTX<br>BALP<br>TNF              |
| Jafarnejad | 2017 | Iran    | T: 58.9<br>P: 57.3 | double-blind | seven probiotic bacteria species <sup>#</sup> | 20          | 21          | 6                            | one Gerilact capsule /d          | 500 mg Ca plus 200 IU vitamin D daily            | hip<br>lumbar spine | CTX<br>BALP<br>OPG<br>OC<br>TNF |
| Lambert    | 2017 | Denmark | T: 60.8<br>P: 62.9 | double-blind | lactic acid bacteria and soflavones           | 38          | 40          | 12                           | 60mg isoflavone and probiotics/d | 1200 mg Ca, 550 mg Mg, and 25mg calcitriol daily | hip<br>lumbar spine | CTX<br>OPG<br>OC                |

BDHQ: a brief-type self-administered diet history questionnaire; BMD: bone mineral density; BTM: bone turnover marker; CFU: colony-forming unit; CTX: collagen type 1 cross-linked C-telopeptide; BALP: bone-specific alkaline phosphatase; OPG: osteoprotegerin; OC: osteocalcin; P: placebo group; T: treat group; TNF: tumor necrosis factor; RCE: red clover extract which is rich in isoflavone aglycones and probiotics; # Lactobacillus casei 1.3 x 10<sup>10</sup> colony-forming units[CFU], Bifidobacterium longum 5 x 10<sup>10</sup> CFU, Lactobacillus acidophilus 1.5 x 10<sup>10</sup> CFU, Lactobacillus rhamnosus 3.5 x 10<sup>9</sup> CFU, Lactobacillus bulgaricus 2.5 x 10<sup>8</sup>

1  
2  
3  
4  
5 CFU, Bifidobacterium breve  $1 \times 10^{10}$  CFU, and Streptococcus thermophilus  $1.5 \times 10^8$  CFU per 500 mg.  
6  
7  
8  
9  
10  
11  
12  
13  
14  
15  
16  
17  
18  
19  
20  
21  
22  
23  
24  
25  
26  
27  
28  
29  
30  
31  
32  
33  
34  
35  
36  
37  
38  
39  
40  
41  
42  
43  
44  
45  
46

For peer review only

1  
2  
3 Figure 1. Flow diagram of the studies search process

4 Figure 2. Forest plots of meta-analysis on probiotics supplements and total hip BMD

5  
6 Figure 3. Forest plots of meta-analysis on probiotics supplements and lumbar spine BMD

7 Figure 4. Forest plots of meta-analysis on probiotics supplements and bone turnover markers

8  
9  
10 Supplementary Figure 1. Funnel plots of meta-analysis on probiotics supplements and BMD: A.  
11 total hip BMD; B. lumbar spine BMD.

12 Supplementary Figure 2. Sensitivity analyses of meta-analysis on probiotics supplements and  
13 BMD: A. total hip BMD; B. lumbar spine BMD.  
14  
15  
16  
17  
18  
19  
20  
21  
22  
23  
24  
25  
26  
27  
28  
29  
30  
31  
32  
33  
34  
35  
36  
37  
38  
39  
40  
41  
42  
43  
44  
45  
46  
47  
48  
49  
50  
51  
52  
53  
54  
55  
56  
57  
58  
59  
60

For peer review only

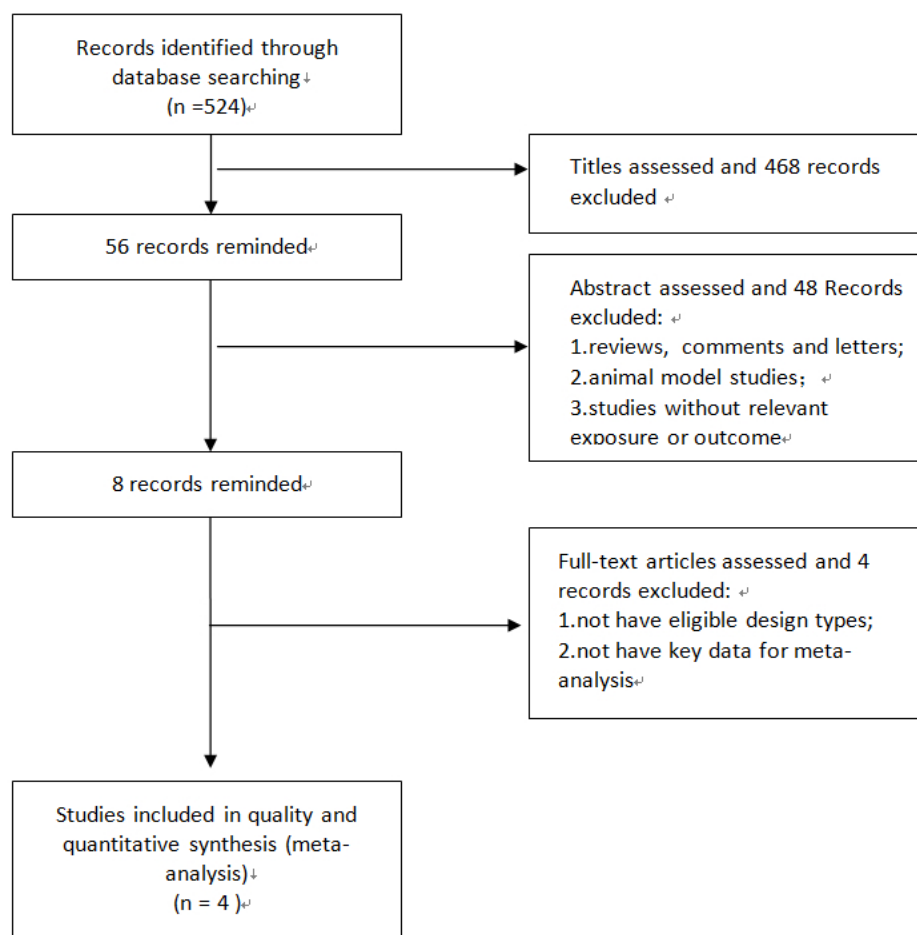

Figure 1. Flow diagram of the studies search process

198x198mm (96 x 96 DPI)

1  
2  
3  
4  
5  
6  
7  
8  
9  
10  
11  
12  
13  
14  
15  
16  
17  
18  
19  
20  
21  
22  
23  
24  
25  
26  
27  
28  
29  
30  
31  
32  
33  
34  
35  
36  
37  
38  
39  
40  
41  
42  
43  
44  
45  
46  
47  
48  
49  
50  
51  
52  
53  
54  
55  
56  
57  
58  
59  
60

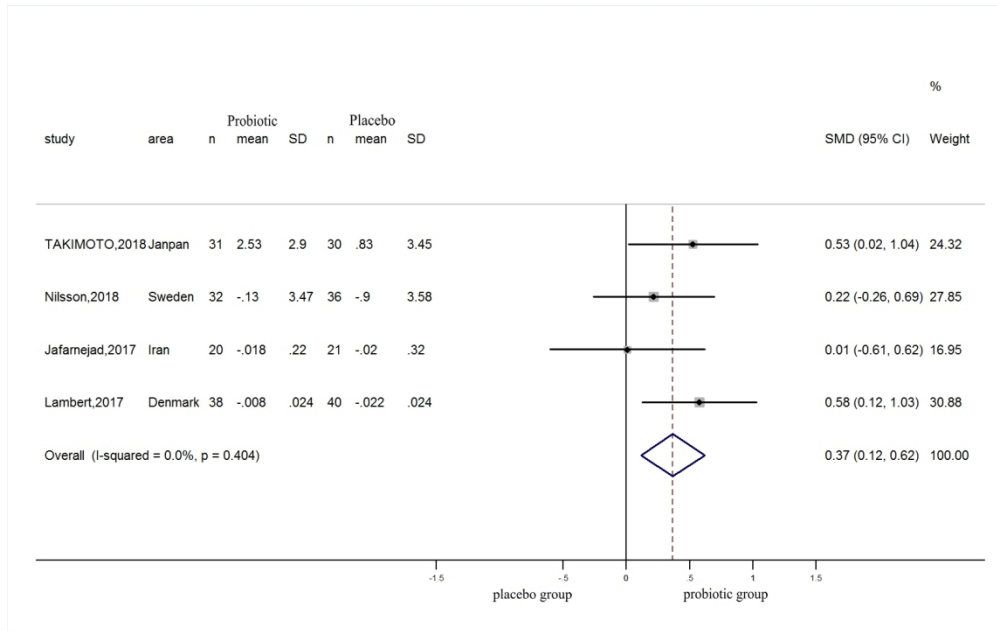

Figure 2. Forest plots of meta-analysis on probiotics supplements and total hip BMD

1  
2  
3  
4  
5  
6  
7  
8  
9  
10  
11  
12  
13  
14  
15  
16  
17  
18  
19  
20  
21  
22  
23  
24  
25  
26  
27  
28  
29  
30  
31  
32  
33  
34  
35  
36  
37  
38  
39  
40  
41  
42  
43  
44  
45  
46  
47  
48  
49  
50  
51  
52  
53  
54  
55  
56  
57  
58  
59  
60

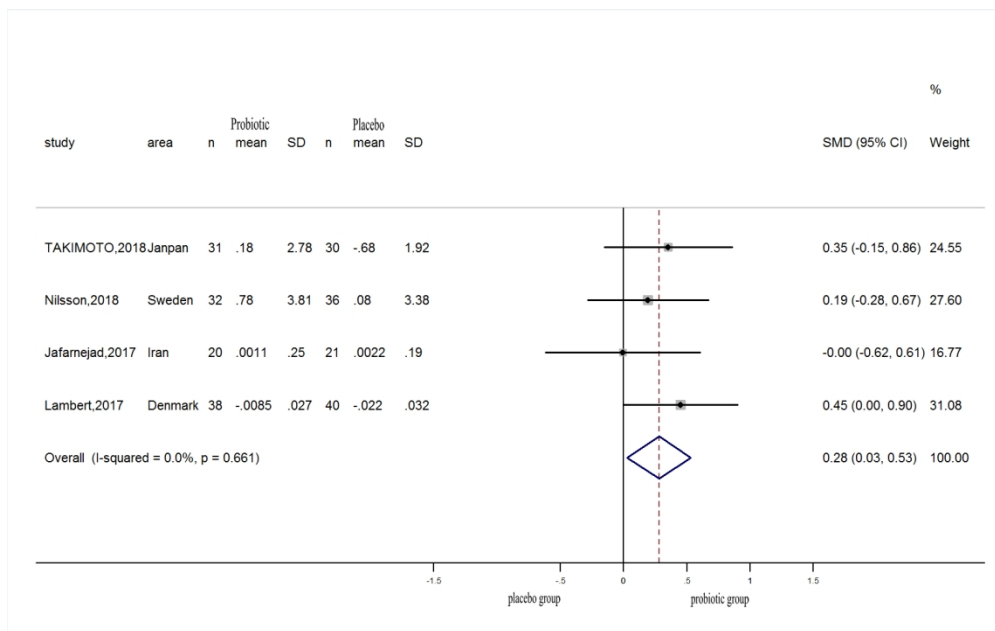

Figure 3. Forest plots of meta-analysis on probiotics supplements and lumbar spine BMD



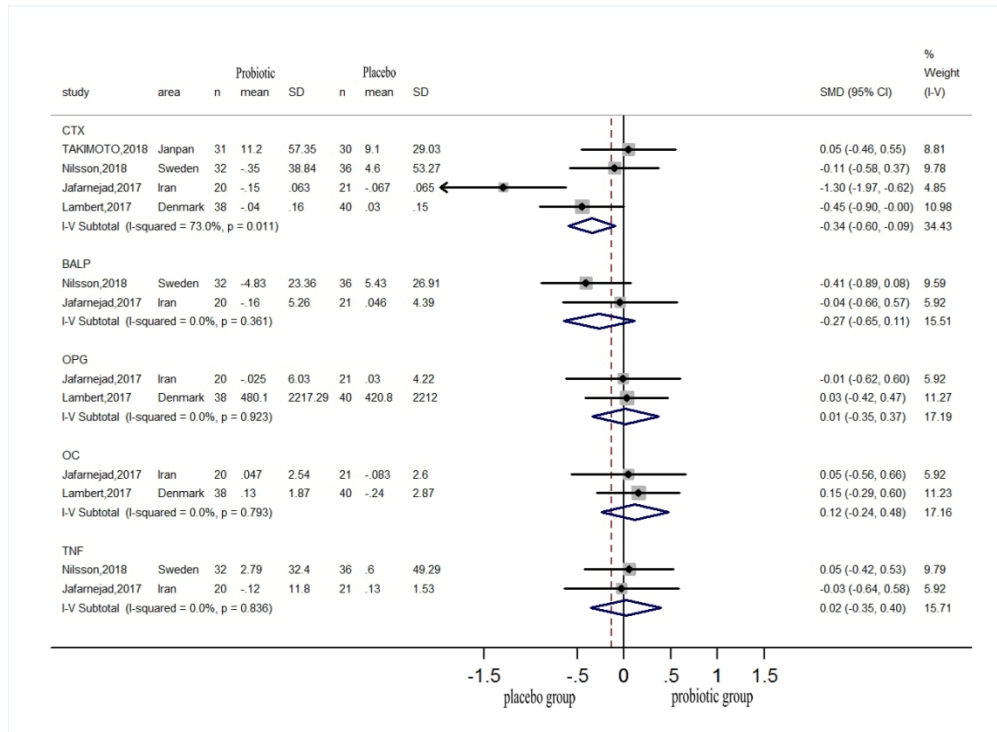

Figure 4. Forest plots of meta-analysis on probiotics supplements and bone turnover markers

1  
2  
3  
4  
5  
6  
7  
8  
9  
10  
11  
12  
13  
14  
15  
16  
17  
18  
19  
20  
21  
22  
23  
24  
25  
26  
27  
28  
29  
30  
31  
32  
33  
34  
35  
36  
37  
38  
39  
40  
41  
42  
43  
44  
45  
46  
47  
48  
49  
50  
51  
52  
53  
54  
55  
56  
57  
58  
59  
60

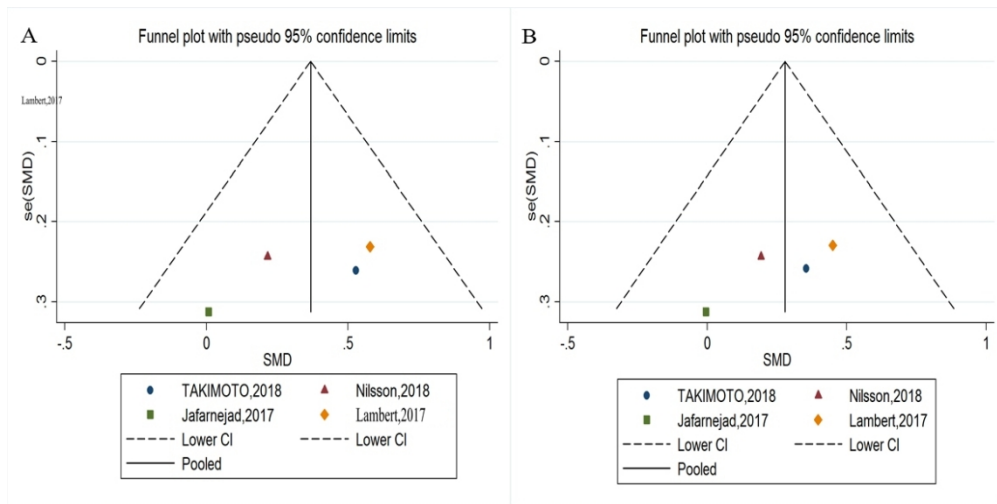

1  
2  
3  
4  
5  
6  
7  
8  
9  
10  
11  
12  
13  
14  
15  
16  
17  
18  
19  
20  
21  
22  
23  
24  
25  
26  
27  
28  
29  
30  
31  
32  
33  
34  
35  
36  
37  
38  
39  
40  
41  
42  
43  
44  
45  
46  
47  
48  
49  
50  
51  
52  
53  
54  
55  
56  
57  
58  
59  
60

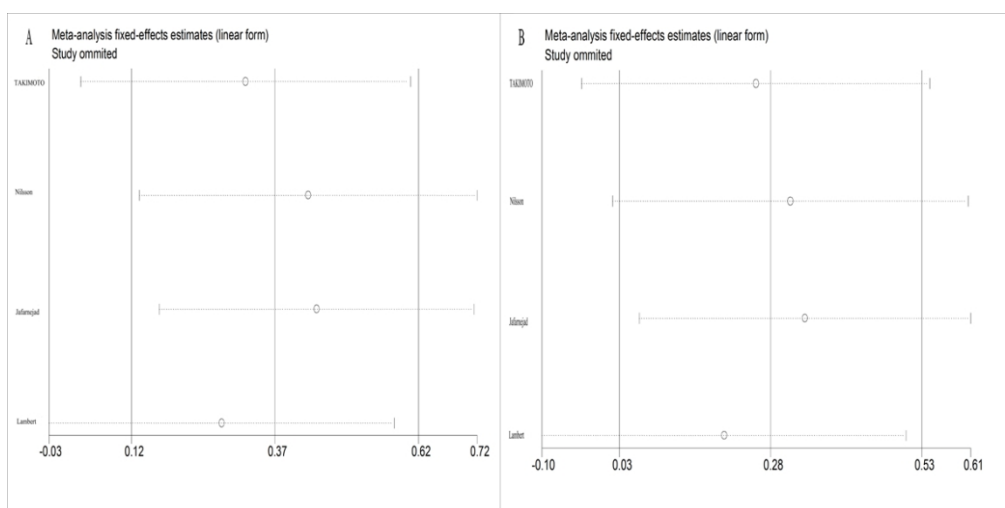

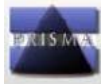

# PRISMA 2009 Checklist

| Section/topic                      | #  | Checklist item                                                                                                                                                                                                                                                                                              | Reported on page #                                                                    |
|------------------------------------|----|-------------------------------------------------------------------------------------------------------------------------------------------------------------------------------------------------------------------------------------------------------------------------------------------------------------|---------------------------------------------------------------------------------------|
| <b>TITLE</b>                       |    |                                                                                                                                                                                                                                                                                                             |                                                                                       |
| Title                              | 1  | Identify the report as a systematic review, meta-analysis, or both.                                                                                                                                                                                                                                         | 1                                                                                     |
| <b>ABSTRACT</b>                    |    |                                                                                                                                                                                                                                                                                                             |                                                                                       |
| Structured summary                 | 2  | Provide a structured summary including, as applicable: background; objectives; data sources; study eligibility criteria, participants, and interventions; study appraisal and synthesis methods; results; limitations; conclusions and implications of key findings; systematic review registration number. | 2                                                                                     |
| <b>INTRODUCTION</b>                |    |                                                                                                                                                                                                                                                                                                             |                                                                                       |
| Rationale                          | 3  | Describe the rationale for the review in the context of what is already known.                                                                                                                                                                                                                              | 3-4                                                                                   |
| Objectives                         | 4  | Provide an explicit statement of questions being addressed with reference to participants, interventions, comparisons, outcomes, and study design (PICOS).                                                                                                                                                  | 3-4                                                                                   |
| <b>METHODS</b>                     |    |                                                                                                                                                                                                                                                                                                             |                                                                                       |
| Protocol and registration          | 5  | Indicate if a review protocol exists, if and where it can be accessed (e.g., Web address), and, if available, provide registration information including registration number.                                                                                                                               | <a href="http://www.crd.york.ac.uk/PROSPERO/">http://www.crd.york.ac.uk/PROSPERO/</a> |
| Eligibility criteria               | 6  | Specify study characteristics (e.g., PICOS, length of follow-up) and report characteristics (e.g., years considered, language, publication status) used as criteria for eligibility, giving rationale.                                                                                                      | 4                                                                                     |
| Information sources                | 7  | Describe all information sources (e.g., databases with dates of coverage, contact with study authors to identify additional studies) in the search and date last searched.                                                                                                                                  | 4                                                                                     |
| Search                             | 8  | Present full electronic search strategy for at least one database, including any limits used, such that it could be repeated.                                                                                                                                                                               | 4                                                                                     |
| Study selection                    | 9  | State the process for selecting studies (i.e., screening, eligibility, included in systematic review, and, if applicable, included in the meta-analysis).                                                                                                                                                   | 4                                                                                     |
| Data collection process            | 10 | Describe method of data extraction from reports (e.g., piloted forms, independently, in duplicate) and any processes for obtaining and confirming data from investigators.                                                                                                                                  | 4                                                                                     |
| Data items                         | 11 | List and define all variables for which data were sought (e.g., PICOS, funding sources) and any assumptions and simplifications made.                                                                                                                                                                       | 4                                                                                     |
| Risk of bias in individual studies | 12 | Describe methods used for assessing risk of bias of individual studies (including specification of whether this was done at the study or outcome level), and how this information is to be used in any data synthesis.                                                                                      | 4                                                                                     |
| Summary measures                   | 13 | State the principal summary measures (e.g., risk ratio, difference in means).                                                                                                                                                                                                                               | 4-5                                                                                   |

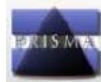

# PRISMA 2009 Checklist

|                      |    |                                                                                                                                                           |     |
|----------------------|----|-----------------------------------------------------------------------------------------------------------------------------------------------------------|-----|
| Synthesis of results | 14 | Describe the methods of handling data and combining results of studies, if done, including measures of consistency (e.g., $I^2$ ) for each meta-analysis. | 4-5 |
|----------------------|----|-----------------------------------------------------------------------------------------------------------------------------------------------------------|-----|

Page 1 of 2

| Section/topic                 | #  | Checklist item                                                                                                                                                                                           | Reported on page # |
|-------------------------------|----|----------------------------------------------------------------------------------------------------------------------------------------------------------------------------------------------------------|--------------------|
| Risk of bias across studies   | 15 | Specify any assessment of risk of bias that may affect the cumulative evidence (e.g., publication bias, selective reporting within studies).                                                             | 4-5                |
| Additional analyses           | 16 | Describe methods of additional analyses (e.g., sensitivity or subgroup analyses, meta-regression), if done, indicating which were pre-specified.                                                         | 4-5                |
| <b>RESULTS</b>                |    |                                                                                                                                                                                                          |                    |
| Study selection               | 17 | Give numbers of studies screened, assessed for eligibility, and included in the review, with reasons for exclusions at each stage, ideally with a flow diagram.                                          | 5                  |
| Study characteristics         | 18 | For each study, present characteristics for which data were extracted (e.g., study size, PICOS, follow-up period) and provide the citations.                                                             | 5                  |
| Risk of bias within studies   | 19 | Present data on risk of bias of each study and, if available, any outcome level assessment (see item 12).                                                                                                | 5-6                |
| Results of individual studies | 20 | For all outcomes considered (benefits or harms), present, for each study: (a) simple summary data for each intervention group (b) effect estimates and confidence intervals, ideally with a forest plot. | 5-6                |
| Synthesis of results          | 21 | Present results of each meta-analysis done, including confidence intervals and measures of consistency.                                                                                                  | 5-6                |
| Risk of bias across studies   | 22 | Present results of any assessment of risk of bias across studies (see Item 15).                                                                                                                          | 5-6                |
| Additional analysis           | 23 | Give results of additional analyses, if done (e.g., sensitivity or subgroup analyses, meta-regression [see Item 16]).                                                                                    | 5-6                |
| <b>DISCUSSION</b>             |    |                                                                                                                                                                                                          |                    |
| Summary of evidence           | 24 | Summarize the main findings including the strength of evidence for each main outcome; consider their relevance to key groups (e.g., healthcare providers, users, and policy makers).                     | 6-10               |
| Limitations                   | 25 | Discuss limitations at study and outcome level (e.g., risk of bias), and at review-level (e.g., incomplete retrieval of identified research, reporting bias).                                            | 6-10               |
| Conclusions                   | 26 | Provide a general interpretation of the results in the context of other evidence, and implications for future research.                                                                                  | 6-10               |
| <b>FUNDING</b>                |    |                                                                                                                                                                                                          |                    |
| Funding                       | 27 | Describe sources of funding for the systematic review and other support (e.g., supply of data); role of funders for the systematic review.                                                               | n/a                |

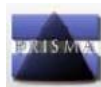

# PRISMA 2009 Checklist

For more information, visit: [www.prisma-statement.org](http://www.prisma-statement.org).

Page 2 of 2

For peer review only

1  
2  
3  
4  
5  
6  
7  
8  
9  
10  
11  
12  
13  
14  
15  
16  
17  
18  
19  
20  
21  
22  
23  
24  
25  
26  
27  
28  
29  
30  
31  
32  
33  
34  
35  
36  
37  
38  
39  
40  
41  
42  
43  
44  
45  
46  
47

# BMJ Open

## Probiotic supplements and bone health in postmenopausal women: a meta-analysis of randomized controlled trials

|                                 |                                                                                                                                                                                                                                                                                                                                                                                                                                                                                                                                                                                                                                                                 |
|---------------------------------|-----------------------------------------------------------------------------------------------------------------------------------------------------------------------------------------------------------------------------------------------------------------------------------------------------------------------------------------------------------------------------------------------------------------------------------------------------------------------------------------------------------------------------------------------------------------------------------------------------------------------------------------------------------------|
| Journal:                        | <i>BMJ Open</i>                                                                                                                                                                                                                                                                                                                                                                                                                                                                                                                                                                                                                                                 |
| Manuscript ID                   | bmjopen-2020-041393.R1                                                                                                                                                                                                                                                                                                                                                                                                                                                                                                                                                                                                                                          |
| Article Type:                   | Original research                                                                                                                                                                                                                                                                                                                                                                                                                                                                                                                                                                                                                                               |
| Date Submitted by the Author:   | 12-Jan-2021                                                                                                                                                                                                                                                                                                                                                                                                                                                                                                                                                                                                                                                     |
| Complete List of Authors:       | Yu, Jiawei; Zhuji Affiliated Hospital of Wenzhou Medical University, Department of Orthopedic Surgery<br>Cao, Gaoyang; Zhejiang University School of Medicine Sir Run Run Shaw Hospital, Department of colorectal surgery<br>Yuan, Shuohui; Zhuji Affiliated Hospital of Wenzhou Medical University, Department of Orthopedic Surgery<br>Luo, Cong; Zhuji Affiliated Hospital of Wenzhou Medical University, Department of Orthopedic Surgery<br>Yu, Jiafeng; Zhuji Affiliated Hospital of Wenzhou Medical University, Department of Orthopedic Surgery<br>Cai, Ming; Zhuji Affiliated Hospital of Wenzhou Medical University, Department of Orthopedic Surgery |
| <b>Primary Subject Heading</b>: | Evidence based practice                                                                                                                                                                                                                                                                                                                                                                                                                                                                                                                                                                                                                                         |
| Secondary Subject Heading:      | Nutrition and metabolism                                                                                                                                                                                                                                                                                                                                                                                                                                                                                                                                                                                                                                        |
| Keywords:                       | Bone diseases < ORTHOPAEDIC & TRAUMA SURGERY, Hip < ORTHOPAEDIC & TRAUMA SURGERY, Spine < ORTHOPAEDIC & TRAUMA SURGERY, NUTRITION & DIETETICS                                                                                                                                                                                                                                                                                                                                                                                                                                                                                                                   |
|                                 |                                                                                                                                                                                                                                                                                                                                                                                                                                                                                                                                                                                                                                                                 |

SCHOLARONE™  
Manuscripts



I, the Submitting Author has the right to grant and does grant on behalf of all authors of the Work (as defined in the below author licence), an exclusive licence and/or a non-exclusive licence for contributions from authors who are: i) UK Crown employees; ii) where BMJ has agreed a CC-BY licence shall apply, and/or iii) in accordance with the terms applicable for US Federal Government officers or employees acting as part of their official duties; on a worldwide, perpetual, irrevocable, royalty-free basis to BMJ Publishing Group Ltd ("BMJ") its licensees and where the relevant Journal is co-owned by BMJ to the co-owners of the Journal, to publish the Work in this journal and any other BMJ products and to exploit all rights, as set out in our [licence](#).

The Submitting Author accepts and understands that any supply made under these terms is made by BMJ to the Submitting Author unless you are acting as an employee on behalf of your employer or a postgraduate student of an affiliated institution which is paying any applicable article publishing charge ("APC") for Open Access articles. Where the Submitting Author wishes to make the Work available on an Open Access basis (and intends to pay the relevant APC), the terms of reuse of such Open Access shall be governed by a Creative Commons licence – details of these licences and which [Creative Commons](#) licence will apply to this Work are set out in our licence referred to above.

Other than as permitted in any relevant BMJ Author's Self Archiving Policies, I confirm this Work has not been accepted for publication elsewhere, is not being considered for publication elsewhere and does not duplicate material already published. I confirm all authors consent to publication of this Work and authorise the granting of this licence.



1 **Probiotic supplements and bone health in postmenopausal**  
2 **women: a meta-analysis of randomized controlled trials**

3 Jiawei Yu<sup>1#</sup>, Gaoyang Cao<sup>2#</sup>, Shuohui Yuan<sup>1</sup>, Cong Luo<sup>1</sup>, Jiafeng Yu<sup>1</sup>, Ming Cai<sup>1\*</sup>

4  
5 <sup>1</sup> Department of Orthopedic Surgery, Zhuji Affiliated Hospital of Wenzhou Medical  
6 University, Shaoxing, China

7 <sup>2</sup> Department of Colorectal Surgery, Zhejiang University School of Medicine Sir Run Run  
8 Shaw Hospital, Hangzhou, China

9  
10 \* Corresponding author. Department of Orthopedic Surgery, Zhuji Affiliated Hospital  
11 of Wenzhou Medical University, Shaoxing, 311800, P.R. China.

12 E-mail address: caiming1208@163.com

13 # The first two authors contributed equally to the work.

## 30 **Abstract**

31 **Objective:** Osteoporosis is a common disease in postmenopausal women. Several  
32 studies have analyzed the associations between dietary supplementation with  
33 probiotics and bone health in postmenopausal women, but the results are still  
34 controversial. We conducted this meta-analysis to assess the effects of probiotics  
35 supplement on bone mineral density (BMD) and bone turnover markers for  
36 postmenopausal women.

37 **Design:** systematic review and meta-analysis.

38 **Methods:** We systematically searched PubMed, EMBASE, and the Cochrane Library  
39 from their inception to November 2020 for randomized controlled trials (RCTs)  
40 assessing probiotic supplements and osteoporosis in postmenopausal women.  
41 Study-specific risk estimates were combined using random-effect models.

42 **Results:** Five RCTs (n = 497) were included. Probiotic supplements were associated  
43 with a significantly higher BMD in the lumbar spine (standardized mean difference,  
44 SMD = 0.27, 95% CI: 0.09–0.44) than in control. There was no difference between  
45 probiotic supplements and BMD in hips (SMD = 0.22, 95% CI: -0.07 – 0.52).  
46 Collagen type 1 cross-linked C-telopeptide (CTX) levels in the treatment groups were  
47 significantly lower than those of the placebo group (SMD = -0.34, 95% CI: -0.60 –  
48 -0.09). In subgroup meta-analysis, levels of bone-specific alkaline phosphatase  
49 (BALP), osteoprotegerin (OPG), osteocalcin (OC), and tumor necrosis factor (TNF)  
50 did not differ between the probiotic and placebo groups.

51 **Conclusions:** Supplementation with probiotics increases lumbar BMD and reduces  
52 bone resorption. More randomized controlled trials are recommended to validate these  
53 results.

## 52 **Strengths and limitations of this study**

54 This is the first meta-analysis on the effectiveness of probiotic supplements on bone  
55 status in postmenopausal women.  
56

57 We included only high-quality randomized controlled trials to improve the level of  
58 evidence.  
59

1  
2  
3  
4 60 These results provide new insights into the association between probiotic supplements  
5  
6 61 lumbar spine bone mineral density

7  
8 62 The limited number of reports prevented us from conducting subgroup analysis and  
9  
10 63 made it difficult to draw firm conclusions.

11 64

12  
13 65

14  
15 66 **Keywords:** probiotics supplement; bone mineral density; bone turnover markers;  
16  
17 67 postmenopausal; meta-analysis

18  
19 68

20  
21 69

22  
23 70

24  
25 71

26  
27 72

28  
29 73

30  
31 74

32  
33 75

34  
35 76

36  
37 77

38  
39 78

40  
41 79

42  
43 80

44  
45 81

46  
47 82

48  
49 83

50  
51 84

52  
53 85

54  
55 86

56  
57 87

58  
59 88

60 89

## 90 Introduction

91 Osteoporosis is characterized by low bone mineral density (BMD) and deteriorated  
92 bone microstructure, leading to reduced bone strength and increased susceptibility to  
93 fractures<sup>1</sup>. Osteoporosis and fracture occur commonly in postmenopausal women,  
94 who experience a natural decline in endogenous estrogen, reducing BMD (on average  
95 2%–5% BMD/y)<sup>2</sup> and adverse effects on bone microarchitecture.

96 Currently, many medications are used in osteoporosis to decrease bone resorption  
97 or increase bone formation. Large randomized controlled trials (RCTs) showed that  
98 estrogen therapy (such as red clover isoflavone supplementation) was effective for  
99 preventing and treating osteoporosis in postmenopausal women<sup>3-5</sup>. However, this  
100 remains controversial because of the increased risk of cancer, including endometrial,  
101 breast, and ovarian cancer<sup>6</sup>. Nevertheless, other anti-resorptive agents are not widely  
102 used because of their side-effects, high prices, and poor compliance on the part of  
103 patients; these include bisphosphonates, calcitonin, and raloxifene. Therefore,  
104 complementary and dietary therapies are more acceptable to some patients. Also,  
105 natural treatments are increasingly requested by patients.<sup>7</sup> It was shown that calcium  
106 and vitamin D supplements effectively improved bone microarchitecture and health<sup>8</sup>;  
107 however, supplementation with calcium and vitamin alone is not sufficient to halt  
108 menopausal bone loss<sup>9</sup>.

109 Therefore, alternative ways to prevent and treat osteoporosis are sought. Probiotics  
110 are popular dietary therapies that have favorable effects on the skeletal system.<sup>10</sup>  
111 Probiotics are "live microorganisms that when administered in adequate amounts will  
112 confer a health benefit on the host" defined by the Food and Agricultural  
113 Organization/World Health Organization (FAO/WHO)<sup>11</sup>, such as bacillus subtilis,  
114 lactobacillus, and other mixed strains. They are affordable and have fewer  
115 side-effects.

116 To our knowledge, there has been no systematic review or meta-analysis of RCTs  
117 with probiotics in the treatment arms, analyzing the effect of probiotics in  
118 postmenopausal-related osteoporosis. Therefore, this systematic review and  
119 meta-analysis were performed to provide an overview of the effects of dietary

1  
2  
3  
4 120 probiotic supplements in postmenopausal related bone resorption in women and to  
5  
6 121 inform researchers of new potential sources of bias to be addressed in future clinical  
7  
8 122 trials.

## 9 123 **Methods and analysis**

### 10 124 **Data sources and search strategies**

11  
12  
13 125 A literature search of relevant studies was performed in PubMed, EMBASE, and  
14  
15 126 the Cochrane Library. A comprehensive search strategy was developed. The protocol  
16  
17 127 was drafted according to the PRISMA statement<sup>12</sup>. The keywords were as follows:  
18  
19 128 'probiotics', 'probiotic supplement', 'bone,' 'osteoporosis', 'osteopenia', 'bone mineral  
20  
21 129 density', 'bone turnover', and 'postmenopausal' (search queries available in  
22  
23 130 Supplementary Table 1). References of retrieved articles were also scanned to identify  
24  
25 131 any additional relevant studies. Two independent reviewers (Jiawei Yu and Gaoyang  
26  
27 132 Cao) conducted this work. Discrepancies were resolved by consensus of the two  
28  
29 133 reviewers. If required, the final disposition was determined by Ming Cai.

### 30 134 **Inclusion and exclusion criteria**

31  
32  
33 135 Inclusion criteria are as follows: (1) randomized controlled trials and prospective  
34  
35 136 cohort studies; (2) consideration of postmenopausal women as patients, consideration  
36  
37 137 of probiotic supplement as interventions, consideration of placebo as a comparison,  
38  
39 138 and consideration of the change of BMD and bone turnover markers (BTM) as  
40  
41 139 outcomes; (3) BMD was measured by dual-energy X-ray absorptiometry (DXA) and  
42  
43 140 BTM was measured using blood tests at baseline, and the end of trial; (4)  
44  
45 141 administered probiotics for more than 6 months; and (5) English language original  
46  
47 142 articles indexed up to November 2020.

48  
49 143 Exclusion criteria are as follows: (1) absence of critical data for meta-analysis; and  
50  
51 144 (2) low-quality articles according to Cochrane checklist.

### 52 145 **Data extraction and quality assessment**

53  
54 146 The characteristics of the relevant articles were extracted and recorded  
55  
56 147 independently by two reviewers (Jiawei Yu and Gaoyang Cao) as follows: first  
57  
58 148 author's name, year, area, age (mean or range), type of probiotic supplement, dose  
59  
60 149 design, course of treatment, number of cases, number of controls, and bone status (as

1  
2  
3  
4 150 shown in Table 1). The Cochrane Collaboration's tool <sup>13</sup> was used for assessing the  
5  
6 151 risk of bias. Six domain-based evaluations (selection bias, performance bias, detection  
7  
8 152 bias, attrition bias, reporting bias, and other bias) were used in the tool to assess the  
9  
10 153 possible bias of randomized controlled trials. The results were displayed as low risk,  
11  
12 154 unclear risk, or high risk of bias (available in Supplementary Table 2).

### 13 155 **Statistical analysis**

14  
15 156 The mean relative change from baseline to the end of the course and standard  
16  
17 157 deviation (SD) were used to express the effect of the probiotic supplement on bone  
18  
19 158 status in postmenopausal women. If the original studies did not provide the mean  
20  
21 159 relative change and standard deviation, we converted the data using a common  
22  
23 160 method <sup>14-15</sup>. The pooled effects of included studies were expressed in terms of  
24  
25 161 standardized mean difference (SMD) with 95% confidence interval (CI). Q test and  $I^2$   
26  
27 162 index were used to evaluate heterogeneity among the included results.  
28  
29 163 Meta-regression was conducted to determine whether different types of probiotic  
30  
31 164 supplements would introduce sources of heterogeneity. Random-effects model and  
32  
33 165 subgroup analysis were used in the face of heterogeneity. Forest plots and funnel plots  
34  
35 166 were produced, and publication bias was tested using Begg's test and the weighted  
36  
37 167 Egger test <sup>16-17</sup>. Sensitivity analysis was conducted to verify the impact of each study  
38  
39 168 on the pooled results. In the sensitivity analyses, each study was omitted to recalculate  
40  
41 169 the pooled estimates. All analysis was performed using STATA 12.0 (StataCorp LP,  
42  
43 170 College Station, TX, USA).

### 44 171 **Patient and public involvement**

45  
46 172 Patient and public involvement is not applicable for this meta-analysis.

### 47 173 **Results**

#### 48 174 **Search results and characteristics of identified studies**

49  
50 175 A total of 604 articles were identified from the initial searches of PubMed and  
51  
52 176 EMBASE, and 547 articles were removed because of absence of relevance. Nine  
53  
54 177 articles were retained after reviewing the abstract according to the exclusion criteria.  
55  
56 178 Finally, five randomized controlled trials<sup>18-22</sup> satisfied the inclusion criteria and  
57  
58 179 entered this meta-analysis after full-text review. A detailed overview of the selection  
59  
60

180 process is outlined in Figure 1.

181 A total of 497 postmenopausal women completed these trials. Among the five  
182 trials, two were conducted in Asia (one in Japan<sup>18</sup>, the other in Iran<sup>20</sup>), and the other  
183 three were in Europe (two in Sweden<sup>19 22</sup>, the last one in Denmark<sup>21</sup>). All trials were  
184 randomized using the double-blinded method. Each trial identified the type of  
185 probiotic supplements used and described the dosage design. Three studies considered  
186 treatment with probiotics only<sup>18-20</sup>, while the other two studies included treatment  
187 with combined isoflavone and probiotics<sup>21 22</sup>. All studies provided BMD data from  
188 DXA scans at the lumbar spine and total hip. Collagen type 1 cross-linked  
189 C-telopeptide (CTX), bone-specific alkaline phosphatase (BALP), osteoprotegerin  
190 (OPG), osteocalcin (OC), and tumor necrosis factor (TNF) were used as bone  
191 turnover markers. Details of the characteristics are displayed in Table 1 and  
192 Supplementary Table 3.

### 193 **Probiotic supplements and lumbar spine BMD**

194 A total of five estimates were included in the meta-analysis. The meta-regression  
195 results also showed no source of heterogeneity from various types of probiotics ( $P =$   
196  $0.987$ ). Therefore, the five estimates were incorporated into the pooled analysis.  
197 Compared to the placebo group, the lumbar spine BMD level of the supplementary  
198 group was higher (SMD = 0.27, 95% CI: 0.09 – 0.44), with no heterogeneity ( $P =$   
199  $0.805$ ;  $I^2 = 0.0$ ) (Figure 2). The funnel plot was symmetrical (Supplementary Figure 1)  
200 and excluded publication bias (Begg's test  $z_c = 0.73$ ,  $P = 0.462$ ; Egger's test  $t = -0.22$ ,  
201  $P = 0.843$ ). Sensitivity analyses indicated that the positive result was robust.  
202 (Supplementary Figure 2).

### 203 **Probiotics supplements and total hip BMD**

204 Overall, five estimates of the association between probiotics supplement and hip  
205 BMD were included in the meta-analysis. The meta-regression results revealed that  
206 various types of probiotics were not a source of heterogeneity ( $P = 0.237$ ). Therefore,  
207 we brought the five estimates into the pooled analysis. There was no difference  
208 between probiotic supplements and BMD in hips (SMD = 0.22, 95% CI: -0.07 –  
209 0.52), with no heterogeneity ( $P = 0.055$ ;  $I^2 = 56.8$ ) (Figure 3). The funnel plot is

1  
2  
3  
4 210 shown in Supplementary Figure 3; it was symmetrical, excluding publication bias  
5  
6 211 (Begg's test  $z_c = -0.24$ ,  $P = 1.00$ ; Egger's test  $t = 1.59$ ,  $P = 0.209$ ). Sensitivity analyses  
7  
8 212 indicated that the positive result was affected by the Jansson trial (Supplementary  
9  
10 213 Figure 4).

#### 214 **Probiotic supplements and bone turnover markers**

215 Four estimates of CTX and two estimates of BALP, OPG, OC, and TNF were  
216 incorporated into the pooled analysis. The results suggested that probiotic  
217 supplements help decrease the supplementary group's body CTX level compared with  
218 the placebo group (SMD = -0.34, 95% CI: -0.60 – -0.09) with substantial  
219 heterogeneity. There was no evidence that probiotic supplements were associated with  
220 BALP, OPG, OC, and TNF (Figure 4).

#### 221 **Discussion**

##### 222 **Main findings**

223 This meta-analysis provides evidence that dietary probiotics supplement can slow  
224 bone resorption in postmenopausal women. Daily supplementation with probiotics for  
225 24 weeks to 12 months significantly decreased bone turnover marker CTX (compared  
226 to placebo) in postmenopausal women. BMD loss at the lumbar spine was  
227 significantly lower in the treatment group.

228 Bone loss occurs throughout life following maturation and is accelerated following  
229 menopause in women<sup>23</sup>. Postmenopausal women have an increased risk of fragility  
230 fractures. Using a naturally-occurring bacterium to significantly reduce the annual  
231 bone loss in this group of patients is a new concept that could lead to a paradigm shift  
232 in osteoporosis prevention. Previous studies in animals demonstrated that  
233 supplementation with specific bacterial strains increases bone density and protect  
234 against osteoporosis<sup>24-26</sup>. Kim et al. reported that the administration of *Lactobacillus*  
235 *casei* 393 significantly increased BMD in ovariectomized rats<sup>27</sup>. For the first time, the  
236 present meta-analysis systemically demonstrated that this probiotic also works in  
237 humans.

238 The lumbar spine and hip are the most suitable organs to assess bone metabolism.  
239 The vertebrae and metaphyses of long bones, rich in trabecular bone, have a higher



1  
2  
3  
4 240 turnover rate than cortical bones in the axis of long bones. Therefore, medications and  
5  
6 241 diseases affecting the lumbar spine and hip are identified earlier than in other skeletal  
7  
8 242 segments<sup>28</sup>. The vertebrae and hips are easily accessible for measuring BMD.  
9  
10 243 Therefore, the lumbar spine and hip BMD were suitable primary outcome variables in  
11  
12 244 the present studies. McCabe et al<sup>29</sup> showed that oral administration of *Lactobacillus*  
13  
14 245 probiotics identified a 45% increase in hip and vertebral trabecular bone volume  
15  
16 246 fraction in male mice. In another study, the administration of *Lactobacillus plantarum*  
17  
18 247 and *Lactobacillus paracasei* to ovariectomized mice showed increased trabecular  
19  
20 248 number compared to sham-ovariectomized control groups<sup>30</sup>. Our meta-analysis  
21  
22 249 showed, in the probiotics group, both total hip and lumbar vertebrae BMD were at  
23  
24 250 significantly higher levels than those of the control.

25  
26 251 CTX and BALP were chosen as critical bone turnover markers. Because BMD  
27  
28 252 depends on the dynamic balance of bone formation and resorption, bone turnover  
29  
30 253 markers are also important parameters analyzed in our meta-analysis. The  
31  
32 254 measurement of CTX has been taken as a marker of bone resorption; osteoclasts  
33  
34 255 produce it during bone resorption<sup>31</sup>. Therefore, the increased levels of serum CTX  
35  
36 256 indicated increased bone resorption. Subgroup included 3 RCT studies, suggesting  
37  
38 257 that probiotic supplements' ingestion significantly reduced the bone resorption marker  
39  
40 258 CTX. Another study from Japan<sup>18</sup> showed that the probiotics group had significantly  
41  
42 259 lower uNTx (urinary type I collagen cross-linked N-telopeptide) levels than the  
43  
44 260 placebo group at 12 weeks of treatment. uNTx is another fragment of type I collagen  
45  
46 261 generated during resorption detected in urine; therefore, this also suggested that  
47  
48 262 probiotics inhibit bone resorption by suppressing osteoclast activity. BALP is another  
49  
50 263 well-known bone turnover marker, an indicator of osteoblast proliferation that is  
51  
52 264 thought to be a bone formation marker<sup>32</sup>. However, the present meta-analysis showed  
53  
54 265 no significant changes in BALP. Similarly, no differences were detected in levels of  
55  
56 266 biochemical markers for bone metabolic indices (OPG, OC).

### 267 **The mechanism of action**

57  
58 268 The mechanisms of action of probiotics are as follows. Probiotics have many  
59  
60 269 functional properties in humans. They function in the gastrointestinal system by

1  
2  
3  
4 270 modifying the microbiota composition, intestinal barrier function, and the immune  
5  
6 271 system, which feeds back systemic benefits to the host, including bone health.  
7  
8 272 Moreover, probiotic function modifying physiological homeostasis of the intestinal  
9  
10 273 flora can also benefit bone metabolism<sup>33</sup>. Gastrointestinal inflammation and systemic  
11  
12 274 inflammation are close to enhanced generation of potent osteoclastogenic cytokines as  
13  
14 275 the leading cause of bone loss<sup>34-35</sup>. Probiotics can restore the balance of the gut  
15  
16 276 microbiota, preventing or moderating gut and systemic inflammation and allowing  
17  
18 277 absorption of nutrients, especially in older adults<sup>36</sup>.

19 278 Furthermore, probiotics decrease levels of inflammatory mediators and cytokines  
20  
21 279 in the gut and bone marrow<sup>37</sup>. These changes give bone cell signals, including  
22  
23 280 osteoblasts, osteoclasts, and stem cells, significantly affecting bone homeostasis.  
24  
25 281 Endocrine factors (such as serotonin and incretins) secreted by the intestine also  
26  
27 282 remarkably affect bone cells<sup>38</sup>. Anti-inflammatory effects are among the underlying  
28  
29 283 mechanisms by which probiotics benefit bone metabolism. There is evidence that  
30  
31 284 arginine deiminase, produced by the probiotic *Lactobacillus brevis* CD2, has an  
32  
33 285 anti-inflammatory effect<sup>39</sup>. Supplementation of probiotics may reduce the expression  
34  
35 286 of pro-inflammatory and osteolytic cytokines, including TNF- $\alpha$ . These cytokines alter  
36  
37 287 anti-osteoclastogenic cytokine expression, leading to enhanced osteoclast formation  
38  
39 288 and inhibited osteoblast activity<sup>40</sup>. Some studies found that probiotic supplementation  
40  
41 289 reduces TNF $\alpha$ , IL-17, and RANKL expression levels in ovariectomized mice<sup>41</sup>.  
42  
43 290 These changes give bone cell signals, such as osteoblasts, osteoclasts, and stem cells,  
44  
45 291 significantly affecting bone homeostasis. More clinical trials are needed in the future  
46  
47 292 to elucidate the relationship between the administration of probiotics and  
48  
49 293 anti-inflammatory effects.

#### 50 294 **Limitations and Strengths**

51  
52 295 Our study has some limitations. First, only five randomized controlled trials with  
53  
54 296 specific population groups satisfied our inclusion criteria. The limited number of  
55  
56 297 reports and specific population groups focusing on the association between the  
57  
58 298 probiotic supplement and BMD and bone turnover markers prevented us from  
59  
60 299 conducting subgroup analysis and drawing conclusive summaries. Furthermore, the

1  
2  
3  
4 300 insufficient number of estimates inflates the impact of the results of a particular study.  
5  
6 301 Second, although meta-regression was used to determine that various types of  
7  
8 302 probiotic supplements did not impact the pooled results, dosage design and course of  
9  
10 303 treatment could also introduce bias. Third, in Lambert's study <sup>21</sup>, probiotics plus  
11  
12 304 isoflavones were used as a treatment regimen, rather than probiotics alone. This may  
13  
14 305 cause some bias; however, we did not want to ignore this valuable study. Third, the  
15  
16 306 units describing BMD change were inconsistent among the five reports. Nilsson's  
17  
18 307 study <sup>19</sup> and Jansson's study <sup>22</sup> applied T score to describe BMD change, while the  
19  
20 308 other three studies used g/cm<sup>2</sup> instead. We could only calculate SMD rather than the  
21  
22 309 weighted mean difference (WMD). Fifth, unfortunately, we did not find a relevant  
23  
24 310 prospective cohort for this meta-analysis. Thus, our results of a meta-analysis should  
25  
26 311 be interpreted with caution.

27 312 Our research also has some strengths. First, to our knowledge, this is the first  
28  
29 313 meta-analysis describing the evidence of the association of probiotic supplements and  
30  
31 314 bone status in postmenopausal women. Second, there is little heterogeneity between  
32  
33 315 the included articles and the fixed-effects model used to calculate the results. Third,  
34  
35 316 all included randomized controlled trials were of high quality.

#### 36 317 Implications and future research

37  
38 318 This systematic review and meta-analysis are useful for multidisciplinary clinicians  
39  
40 319 to evaluate their practices and make a proper clinical decision. The beneficial effects  
41  
42 320 of probiotic supplements may infect probiotic indication in postmenopausal women  
43  
44 321 with osteoporosis. More RCT studies from different regions are needed to validate our  
45  
46 322 argument and help answer research questions about probiotic supplements, dose, and  
47  
48 323 the optimal duration.

#### 49 324 **Conclusion**

50  
51 325 Our systematic review and meta-analysis showed that probiotic supplementations in  
52  
53 326 postmenopausal women were associated with preserving **lumbar spine** BMD and  
54  
55 327 attenuating bone resorption. An appropriate supplement of probiotics could be  
56  
57 328 recommended to improve bone status in postmenopausal women.  
58  
59 329

330

**331 Acknowledgments**

332 The authors thank the researchers of the included articles for information relevant to  
333 the analysis.

**334 Contributors**

335 MC and JY(Jiawei Yu) conceived and designed the meta-analysis; GC, SY and CL  
336 searched the literature; JY(Jiawei Yu), GC, and SY analyzed the data; JY(Jiawei Yu)  
337 contributed analysis tools; JY(Jiawei Yu) and GC wrote the paper; JY(Jiafeng Yu)  
338 and MC revised the manuscript.

**339 Funding**

340 None

**341 Competing interests**

342 The authors declare no conflicts of interest. This study does not contain human  
343 participants or animals.

**344 Patient consent for publication**

345 Not required

**346 Provenance and peer review**

347 Not commissioned; externally peer-reviewed

**348 Data availability statement**

349 All data relevant to the study are included in the article or uploaded as supplementary  
350 information. No additional data are available.

351

352

353

354

355

356

357

358

359

## References

1. John A. Kanis. Diagnosis of osteoporosis and assessment of fracture risk. *The Lancet* 2002;359(9321):1929-36.2002-01-01].
2. J. S. Finkelstein, S. E. Brockwell, V. Mehta, et al. Bone mineral density changes during the menopause transition in a multiethnic cohort of women. *J Clin Endocrinol Metab* 2008;93(3):861-68. doi: 10.1210/jc.2007-1876 pmid:181604672008-03-01].
3. J. Chen, X. Liu. [Effects on blood fat and bone density of postmenopausal women fed by soy protein with isoflavone]. *Zhonghua Yi Xue Za Zhi* 2014;94(3):215-17. pmid:247314672014-01-21].
4. P. B. Clifton-Bligh, M. L. Nery, R. J. Clifton-Bligh, et al. Red clover isoflavones enriched with formononetin lower serum LDL cholesterol-a randomized, double-blind, placebo-controlled study. *EUR J CLIN NUTR* 2015;69(1):134-42. doi: 10.1038/ejcn.2014.207 pmid:253698312015-01-01].
5. A. C. Thorup, M. N. Lambert, H. S. Kahr, M. Bjerre, P. B. Jeppesen. Intake of Novel Red Clover Supplementation for 12 Weeks Improves Bone Status in Healthy Menopausal Women. *Evid Based Complement Alternat Med* 2015;2015:689138. doi: 10.1155/2015/689138 pmid:262659262015-01-20].
6. J. Simin, R. Tamimi, J. Lagergren, H. O. Adami, N. Brusselaers. Menopausal hormone therapy and cancer risk: An overestimated risk? *EUR J CANCER* 2017;84:60-68. doi: 10.1016/j.ejca.2017.07.012 pmid:28783542.[Copyright (c) 2017 Elsevier Ltd. All rights reserved.:\*2017-10-01].
7. P. De Franciscis, N. Colacurci, G. Riemma, et al. A Nutraceutical Approach to Menopausal Complaints. *Medicina (Kaunas)* 2019;55(9) doi: 10.3390/medicina55090544 pmid:314663812019-08-28].
8. S. Boonen, D. Vanderschueren, P. Haentjens, P. Lips. Calcium and vitamin D in the prevention and treatment of osteoporosis - a clinical update. *J INTERN MED* 2006;259(6):539-52. doi: 10.1111/j.1365-2796.2006.01655.x pmid:167045542006-06-01].
9. S. Gonnelli, C. Cepollaro, C. Pondrelli, et al. Bone turnover and the response to alendronate treatment in postmenopausal osteoporosis. *Calcif Tissue Int* 1999;65(5):359-64. pmid:105417601999-11-01].
10. M. M. Zaiss, R. M. Jones, G. Schett, R. Pacifici. The gut-bone axis: how bacterial metabolites bridge the distance. *J CLIN INVEST* 2019;129(8):3018-28. doi: 10.1172/JCI128521 pmid:313052652019-07-15].
11. Food And Agriculture Organization Organization. Guidelines for the Evaluation of Probiotics in Food: Report of a Joint FAO/WHO Working Group. In. Ontario, Canada: Food and Agriculture Organization of the United Nations and World Health Organization, 2002.
12. D. Moher, A. Liberati, J. Tetzlaff, D. G. Altman. Preferred reporting items for systematic reviews and meta-analyses: the PRISMA statement. *PLOS MED* 2009;6(7):e1000097. doi: 10.1371/journal.pmed.1000097 pmid:196210722009-07-21].
13. Green S. Editors Higgins JPT. Cochrane Handbook for Systematic Reviews of Interventions Version 5.1.0 [updated March 2011]. In: The Cochrane Collaboration, 2011.
14. Pagano M. GK. Principles of Biostatistics. Second Edition, ed: Duxbury 2000.
15. L. Kaiser. Adjusting for baseline: change or percentage change? *STAT MED* 1989;8(10):1183-90. pmid:26829091989-10-01].

- 1  
2  
3 403 16. C. B. Begg, M. Mazumdar. Operating characteristics of a rank correlation test for publication bias.  
4 404 *BIOMETRICS* 1994;50(4):1088-101. pmid:77869901994-12-01].
- 5 405 17. M. Egger, G. D. Smith. Bias in location and selection of studies. *BMJ* 1998;316(7124):61-66. doi:  
6 406 10.1136/bmj.316.7124.61 pmid:94512741998-01-03].
- 7 407 18. T. Takimoto, M. Hatanaka, T. Hoshino, et al. Effect of *Bacillus subtilis* C-3102 on bone mineral  
8 408 density in healthy postmenopausal Japanese women: a randomized, placebo-controlled,  
9 409 double-blind clinical trial. *Biosci Microbiota Food Health* 2018;37(4):87-96. doi:  
10 410 10.12938/bmfh.18-006 pmid:303701922018-01-20].
- 11 411 19. A. G. Nilsson, D. Sundh, F. Backhed, M. Lorentzon. *Lactobacillus reuteri* reduces bone loss in  
12 412 older women with low bone mineral density: a randomized, placebo-controlled, double-blind,  
13 413 clinical trial. *J INTERN MED* 2018;284(3):307-17. doi: 10.1111/joim.12805 pmid:29926979.[(c)  
14 414 2018 The Authors. Journal of Internal Medicine published by John Wiley & Sons  
15 415 Ltd on behalf of Association for Publication of The Journal of Internal  
16 416 Medicine.:\*2018-09-01].
- 17 417 20. S. Jafarnejad, K. Djafarian, M. R. Fazeli, et al. Effects of a Multispecies Probiotic Supplement on  
18 418 Bone Health in Osteopenic Postmenopausal Women: A Randomized, Double-blind, Controlled  
19 419 Trial. *J AM COLL NUTR* 2017;36(7):497-506. doi: 10.1080/07315724.2017.1318724  
20 420 pmid:286283742017-09-01].
- 21 421 21. MNT Lambert, C. B. Thybo, S. Lykkeboe, et al. Combined bioavailable isoflavones and  
22 422 probiotics improve bone status and estrogen metabolism in postmenopausal osteopenic women: a  
23 423 randomized controlled trial. *AM J CLIN NUTR* 2017;106(3):909-20. doi:  
24 424 10.3945/ajcn.117.153353 pmid:28768651.[(c) 2017 American Society for  
25 425 Nutrition.:\*2017-09-01].
- 26 426 22. Per-Anders Jansson, Dan Curiac, Irini Lazou Ahrén, et al. Probiotic treatment using a mix of three  
27 427 *Lactobacillus* strains for lumbar spine bone loss in postmenopausal women: a randomised,  
28 428 double-blind, placebo-controlled, multicentre trial. *The Lancet Rheumatology*  
29 429 2019;1(3):e154-62.2019-01-01].
- 30 430 23. D. Bliuc, N. D. Nguyen, D. Alarkawi, et al. Accelerated bone loss and increased post-fracture  
31 431 mortality in elderly women and men. *Osteoporos Int* 2015;26(4):1331-39. doi:  
32 432 10.1007/s00198-014-3014-9 pmid:256004732015-04-01].
- 33 433 24. R. Mutuş, N. Kocabagli, M. Alp, et al. The effect of dietary probiotic supplementation on tibial  
34 434 bone characteristics and strength in broilers. *Poult Sci* 2006;85(9):1621-25. doi:  
35 435 10.1093/ps/85.9.1621 pmid:169778482006-09-01].
- 36 436 25. R. A. Britton, R. Irwin, D. Quach, et al. Probiotic *L. reuteri* treatment prevents bone loss in a  
37 437 menopausal ovariectomized mouse model. *J CELL PHYSIOL* 2014;229(11):1822-30. doi:  
38 438 10.1002/jcp.24636 pmid:24677054.[© 2014 Wiley Periodicals, Inc.:\*2014-11-01].
- 39 439 26. F. C. Rodrigues, A. S. Castro, V. C. Rodrigues, et al. Yacon flour and *Bifidobacterium longum*  
40 440 modulate bone health in rats. *J MED FOOD* 2012;15(7):664-70. doi: 10.1089/jmf.2011.0296  
41 441 pmid:225100442012-07-01].
- 42 442 27. Jong Gun Kim, Eungsuk Lee, Sae Hun Kim, et al. Effects of a *Lactobacillus casei* 393 fermented  
43 443 milk product on bone metabolism in ovariectomised rats. *INT DAIRY J*  
44 444 2009;19(11):690-95.2009-01-01].
- 45 445 28. Ego Seeman. Chapter 1 - Modeling and Remodeling: The Cellular Machinery Responsible for the  
46 446 Gain and Loss of Bone's Material and Structural Strength: Academic Press 2008:1-28.



- 1  
2  
3 447 29. L. R. McCabe, R. Irwin, L. Schaefer, R. A. Britton. Probiotic use decreases intestinal  
4 448 inflammation and increases bone density in healthy male but not female mice. *J CELL PHYSIOL*  
5 449 2013;228(8):1793-98. doi: 10.1002/jcp.24340 pmid:23389860.[Copyright (c) 2013 Wiley  
6 450 Periodicals, Inc.:\*2013-08-01].  
7  
8 451 30. K. Parvaneh, M. Ebrahimi, M. R. Sabran, et al. Probiotics (Bifidobacterium longum) Increase  
9 452 Bone Mass Density and Upregulate Sparc and Bmp-2 Genes in Rats with Bone Loss Resulting  
10 453 from Ovariectomy. *BIOMED RES INT* 2015;2015:897639. doi: 10.1155/2015/897639  
11 454 pmid:263664212015-01-20].  
12  
13 455 31. P. Szulc, P. D. Delmas. Biochemical markers of bone turnover: potential use in the investigation  
14 456 and management of postmenopausal osteoporosis. *Osteoporos Int* 2008;19(12):1683-704. doi:  
15 457 10.1007/s00198-008-0660-9 pmid:186295702008-12-01].  
16  
17 458 32. Katharina E. Scholz-Ahrens, Berit Adolphi, Florence Rochat, et al. Effects of probiotics,  
18 459 prebiotics, and synbiotics on mineral metabolism in ovariectomized rats — impact of bacterial  
19 460 mass, intestinal absorptive area and reduction of bone turn-over. *NFS Journal*  
20 461 2016;3:41-50.2016-01-01].  
21  
22 462 33. V. Tremaroli, F. Backhed. Functional interactions between the gut microbiota and host  
23 463 metabolism. *NATURE* 2012;489(7415):242-49. doi: 10.1038/nature11552  
24 464 pmid:229722972012-09-13].  
25  
26 465 34. T. Ali, D. Lam, M. S. Bronze, M. B. Humphrey. Osteoporosis in inflammatory bowel disease. *AM*  
27 466 *JMED* 2009;122(7):599-604. doi: 10.1016/j.amjmed.2009.01.022 pmid:195591582009-07-01].  
28  
29 467 35. T. Ciucci, L. Ibanez, A. Boucoiran, et al. Bone marrow Th17 TNFalpha cells induce osteoclast  
30 468 differentiation, and link bone destruction to IBD. *GUT* 2015;64(7):1072-81. doi:  
31 469 10.1136/gutjnl-2014-306947 pmid:25298539.[Published by the BMJ Publishing Group Limited.  
32 470 For permission to use (where not  
33 471 already granted under a licence) please go to  
34 472 <http://group.bmj.com/group/rights-licensing/permissions>.\*2015-07-01].  
35  
36 473 36. P. Hemarajata, J. Versalovic. Effects of probiotics on gut microbiota: mechanisms of intestinal  
37 474 immunomodulation and neuromodulation. *Therap Adv Gastroenterol* 2013;6(1):39-51. doi:  
38 475 10.1177/1756283X12459294 pmid:233200492013-01-01].  
39  
40 476 37. Y. P. Lin, C. H. Thibodeaux, J. A. Pena, G. D. Ferry, J. Versalovic. Probiotic Lactobacillus reuteri  
41 477 suppress proinflammatory cytokines via c-Jun. *INFLAMM BOWEL DIS* 2008;14(8):1068-83. doi:  
42 478 10.1002/ibd.20448 pmid:184258022008-08-01].  
43  
44 479 38. V. Tremaroli, F. Backhed. Functional interactions between the gut microbiota and host  
45 480 metabolism. *NATURE* 2012;489(7415):242-49. doi: 10.1038/nature11552  
46 481 pmid:229722972012-09-13].  
47  
48 482 39. T. Maekawa, G. Hajishengallis. Topical treatment with probiotic Lactobacillus brevis CD2  
49 483 inhibits experimental periodontal inflammation and bone loss. *J PERIODONTAL RES*  
50 484 2014;49(6):785-91. doi: 10.1111/jre.12164 pmid:24483135.[(c) 2014 John Wiley & Sons A/S.  
51 485 Published by John Wiley & Sons Ltd.:\*2014-12-01].  
52  
53 486 40. R. Irwin, T. Lee, V. B. Young, N. Parameswaran, L. R. McCabe. Colitis-induced bone loss is  
54 487 gender dependent and associated with increased inflammation. *INFLAMM BOWEL DIS*  
55 488 2013;19(8):1586-97. doi: 10.1097/MIB.0b013e318289e17b pmid:237028052013-07-01].  
56  
57 489 41. J. Y. Li, B. Chassaing, A. M. Tyagi, et al. Sex steroid deficiency-associated bone loss is  
58 490 microbiota dependent and prevented by probiotics. *J CLIN INVEST* 2016;126(6):2049-63. doi:

1  
2  
3  
4  
5  
6  
7  
8  
9  
10  
11  
12  
13  
14  
15  
16  
17  
18  
19  
20  
21  
22  
23  
24  
25  
26  
27  
28  
29  
30  
31  
32  
33  
34  
35  
36  
37  
38  
39  
40  
41  
42  
43  
44  
45  
46  
47  
48  
49  
50  
51  
52  
53  
54  
55  
56  
57  
58  
59  
60

491 10.1172/JCI86062 pmid:271112322016-06-01].

For peer review only



Table 1. Characteristics of included randomized controlled trials in the meta-analysis

| Study      | Year | Area    | Age                | Blinding     | Type of probiotic supplement        | Number of Treatment | Number of Placebo | Course of treatment | BMD                 | BTM                             |
|------------|------|---------|--------------------|--------------|-------------------------------------|---------------------|-------------------|---------------------|---------------------|---------------------------------|
| Jansson    | 2019 | Sweden  | T: 59.1<br>P: 58.1 | double blind | three Lactobacillus strains*        | 126                 | 123               | 12 months           | lumbar spine<br>hip | N/A                             |
| Takimoto   | 2018 | Japan   | T: 57.5<br>P: 57.8 | double blind | bacillus subtilis C-3102            | 31                  | 30                | 6 months            | lumbar spine<br>hip | CTX                             |
| Nilsson    | 2018 | Sweden  | T: 76.4<br>P: 76.3 | double blind | lactobacillus reuteri 6475          | 32                  | 36                | 12 months           | lumbar spine<br>hip | CTX<br>BALP<br>TNF              |
| Jafarnejad | 2017 | Iran    | T: 58.9<br>P: 57.3 | double blind | seven probiotic bacteria species#   | 20                  | 21                | 6 months            | lumbar spine<br>hip | CTX<br>BALP<br>OPG<br>OC<br>TNF |
| Lambert    | 2017 | Denmark | T: 60.8<br>P: 62.9 | double blind | lactic acid bacteria and soflavones | 38                  | 40                | 12 months           | lumbar spine<br>hip | CTX<br>OPG<br>OC                |

BMD: bone mineral density; BTM: bone turnover marker; CTX: collagen type 1 cross-linked C-telopeptide; BALP: bone-specific alkaline phosphatase; OPG: osteoprotegerin; OC: osteocalcin; TNF: tumor necrosis factor; N/A: not available; \* Lactobacillus paracasei DSM 13434, Lactobacillus plantarum DSM 15312, and Lactobacillus plantarum DSM 15313; # Lactobacillus casei, Bifidobacterium longum, Lactobacillus acidophilus, Lactobacillus rhamnosus, Lactobacillus bulgaricus, Bifidobacterium breve, and Streptococcus thermophilus.

1  
2  
3  
4 Figure 1. Flow diagram of the studies search process

5 Figure 2. Forest plots of meta-analysis on probiotics supplements and lumbar spine BMD

6  
7 Figure 3. Forest plots of meta-analysis on probiotics supplements and hip BMD

8  
9 Figure 4. Forest plots of meta-analysis on probiotics supplements and bone turnover markers

10  
11  
12  
13 Supplementary Figure 1. Funnel plots of meta-analysis on probiotics supplements and lumbar  
14 spine BMD

15  
16  
17 Supplementary Figure 2. Sensitivity analyses of meta-analysis on probiotics supplements and  
18 lumbar spine BMD

19  
20 Supplementary Figure 3. Funnel plots of meta-analysis on probiotics supplements and hip  
21 BMD

22  
23 Supplementary Figure 4. Sensitivity analyses of meta-analysis on probiotics supplements and  
24 hip BMD

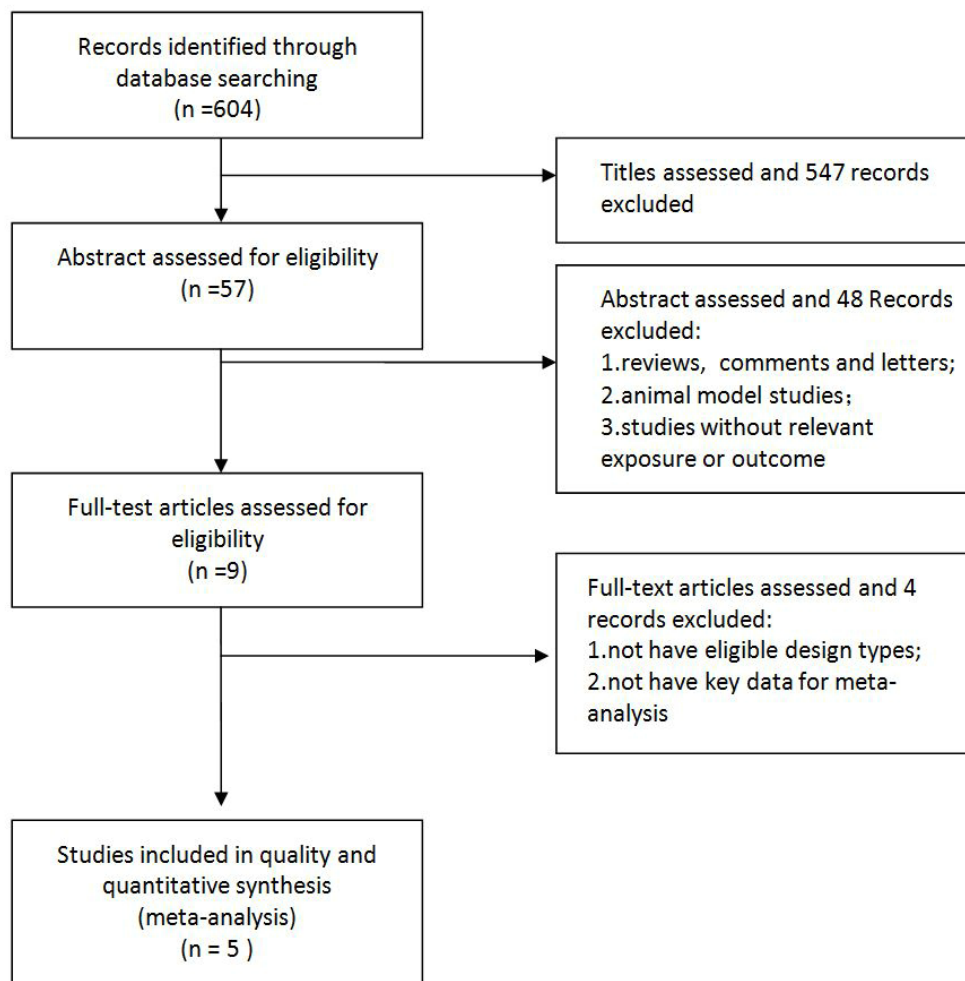

Figure 1. Flow diagram of the studies search process

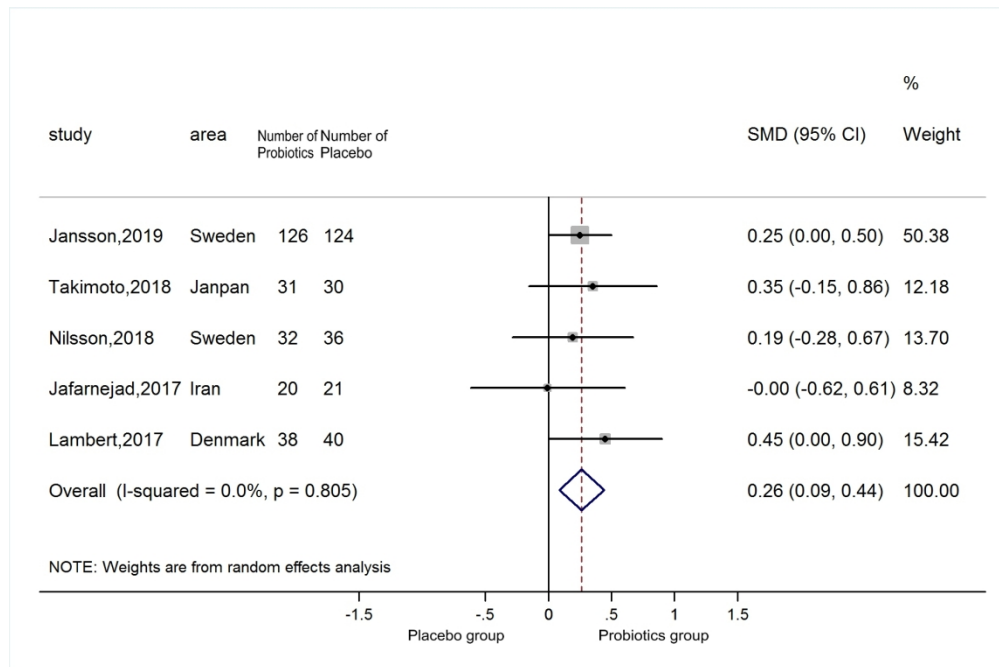

Figure 2. Forest plots of meta-analysis on probiotics supplements and lumbar spine BMD

1  
2  
3  
4  
5  
6  
7  
8  
9  
10  
11  
12  
13  
14  
15  
16  
17  
18  
19  
20  
21  
22  
23  
24  
25  
26  
27  
28  
29  
30  
31  
32  
33  
34  
35  
36  
37  
38  
39  
40  
41  
42  
43  
44  
45  
46  
47  
48  
49  
50  
51  
52  
53  
54  
55  
56  
57  
58  
59  
60

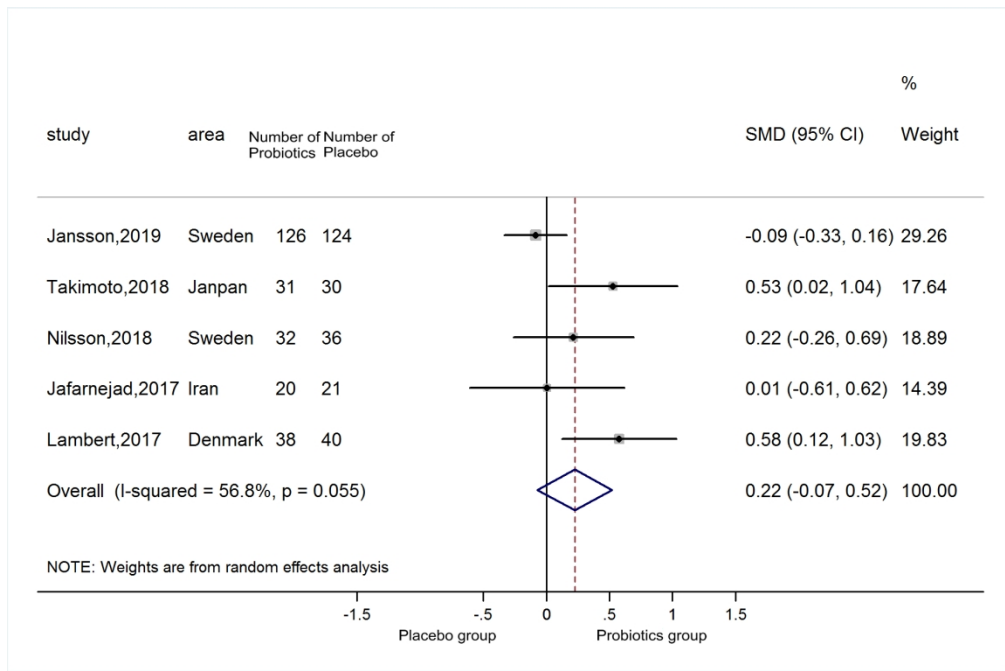

Figure 3. Forest plots of meta-analysis on probiotics supplements and hip BMD

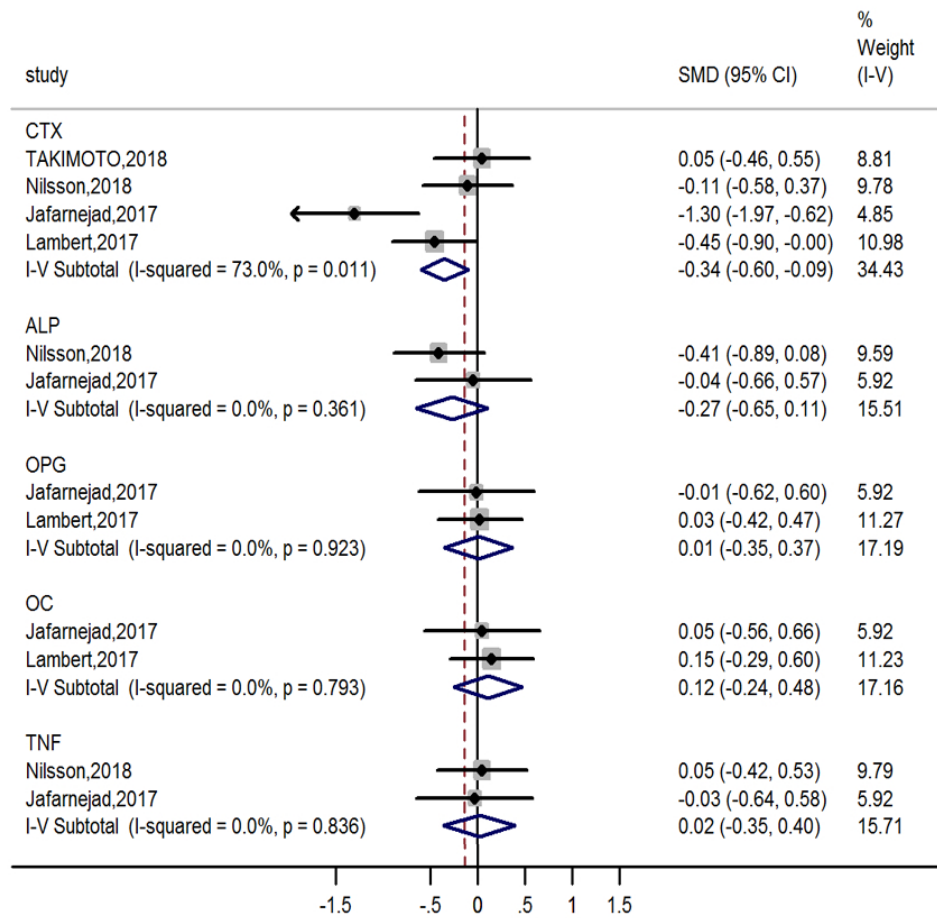

37 Figure 4. Forest plots of meta-analysis on probiotics supplements and bone turnover markers  
38  
39  
40  
41  
42  
43  
44  
45  
46  
47  
48  
49  
50  
51  
52  
53  
54  
55  
56  
57  
58  
59  
60

Supplementary Table 1 Search strategy of Medline

| #   | Searches             |
|-----|----------------------|
| 1   | Probiotics           |
| 2   | Probiotic supplement |
| 3   | Bone                 |
| 4   | Osteoporosis         |
| 5.  | Osteopenia           |
| 6.  | Bone mineral density |
| 7.  | Bone turnover        |
| 8.  | Postmenopausal       |
| 9.  | 1 and 3 and 8        |
| 10. | 1 and 4 and 8        |
| 11. | 1 and 5 and 8        |
| 12. | 1 and 6 and 8        |
| 13. | 1 and 7 and 8        |
| 14. | 2 and 3 and 8        |
| 15. | 2 and 4 and 8        |
| 16. | 2 and 5 and 8        |
| 17. | 2 and 6 and 8        |
| 18. | 2 and 7 and 8        |

The same strategy for other databases

Supplementary Table 2. Assessment of risk bias of the studies included in the meta-analysis

| Study      | Selection bias             | Selection bias         | Performance bias                       | Detection bias                 | Attrition bias          | Reporting bias      | Overall |
|------------|----------------------------|------------------------|----------------------------------------|--------------------------------|-------------------------|---------------------|---------|
|            | Random sequence generation | Allocation concealment | Blinding of participants and personnel | Blinding of outcome assessment | Incomplete outcome data | Selective reporting |         |
| Jansson    | Low                        | Low                    | Low                                    | Low                            | Low                     | Low                 | Low     |
| Takimoto   | Low                        | Low                    | Low                                    | Low                            | Low                     | Low                 | Low     |
| Nilsson    | Low                        | Unclear                | Low                                    | Low                            | Low                     | Low                 | Low     |
| Jafarnejad | Low                        | Low                    | Low                                    | Low                            | Low                     | Low                 | Low     |
| Lambert    | Low                        | Unclear                | Low                                    | Low                            | Low                     | Low                 | Low     |



Supplementary Table 3. Other characteristics of included randomized controlled trials in the meta-analysis

| Study      | Year | Area    | dose design                      | Minerals intake                                  | Measurement of outcome |
|------------|------|---------|----------------------------------|--------------------------------------------------|------------------------|
| Jansson    | 2019 | Sweden  | 1 x10 <sup>10</sup> CFU/d        | N/A                                              | After 12 months        |
| Takimoto   | 2018 | Japan   | 3.4x10 <sup>9</sup> CFU /d       | BDHQ                                             | After 6 months         |
| Nilsson    | 2018 | Sweden  | 5x10 <sup>9</sup> CFU twice/d    | A standardized questionnaire                     | After 12 months        |
| Jafarnejad | 2017 | Iran    | one Gerilact capsule /d*         | 500 mg Ca plus 200 IU vitamin D daily            | After 6 months         |
| Lambert    | 2017 | Denmark | 60mg isoflavone and probiotics/d | 1200 mg Ca, 550 mg Mg, and 25mg calcitriol daily | After 12 months        |

BDHQ: a brief-type self-administered diet history questionnaire; CFU: colony-forming unit; \*Lactobacillus casei 1.3 x 10<sup>10</sup> CFU, Bifidobacterium longum 5 x 10<sup>10</sup> CFU, Lactobacillus acidophilus 1.5 x 10<sup>10</sup> CFU, Lactobacillus rhamnosus 3.5 x 10<sup>9</sup> CFU, Lactobacillus bulgaricus 2.5 x 10<sup>8</sup> CFU, Bifidobacterium breve 1 x 10<sup>10</sup> CFU, and Streptococcus thermophilus 1.5 x 10<sup>8</sup> CFU per 500 mg.

1  
2  
3  
4  
5  
6  
7  
8  
9  
10  
11  
12  
13  
14  
15  
16  
17  
18  
19  
20  
21  
22  
23  
24  
25  
26  
27  
28  
29  
30  
31  
32  
33  
34  
35  
36  
37  
38  
39  
40  
41  
42  
43  
44  
45  
46  
47  
48  
49  
50  
51  
52  
53  
54  
55  
56  
57  
58  
59  
60

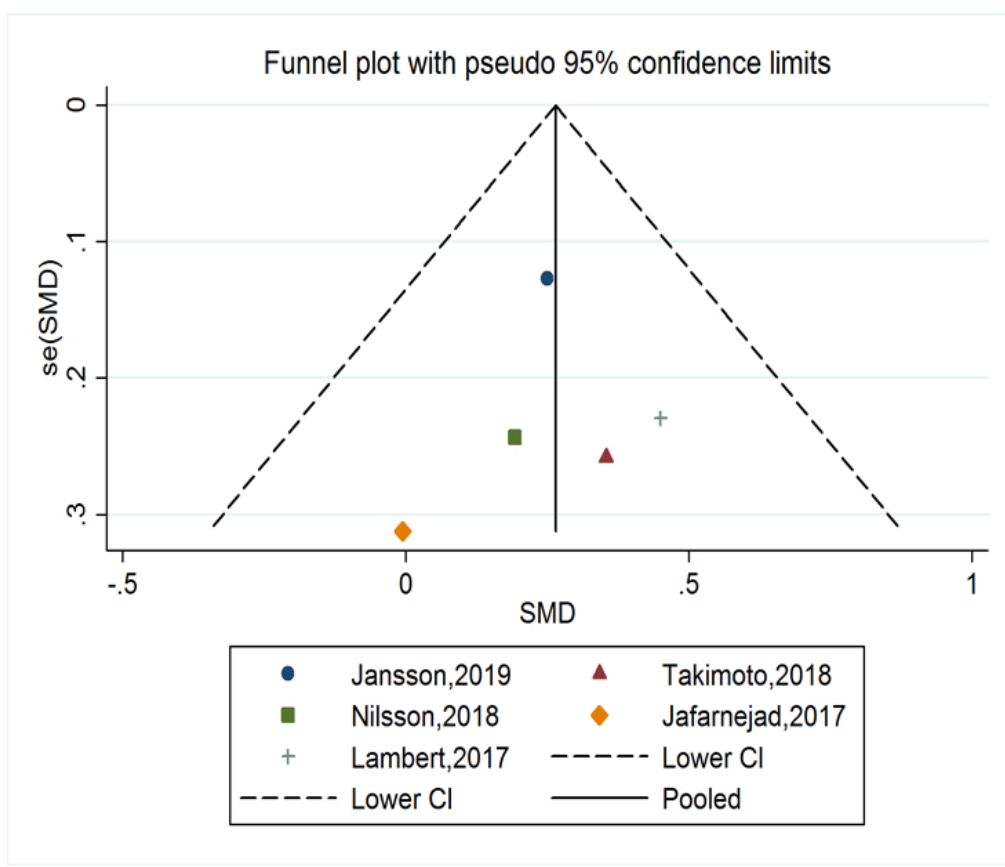

1  
2  
3  
4  
5  
6  
7  
8  
9  
10  
11  
12  
13  
14  
15  
16  
17  
18  
19  
20  
21  
22  
23  
24  
25  
26  
27  
28  
29  
30  
31  
32  
33  
34  
35  
36  
37  
38  
39  
40  
41  
42  
43  
44  
45  
46  
47  
48  
49  
50  
51  
52  
53  
54  
55  
56  
57  
58  
59  
60

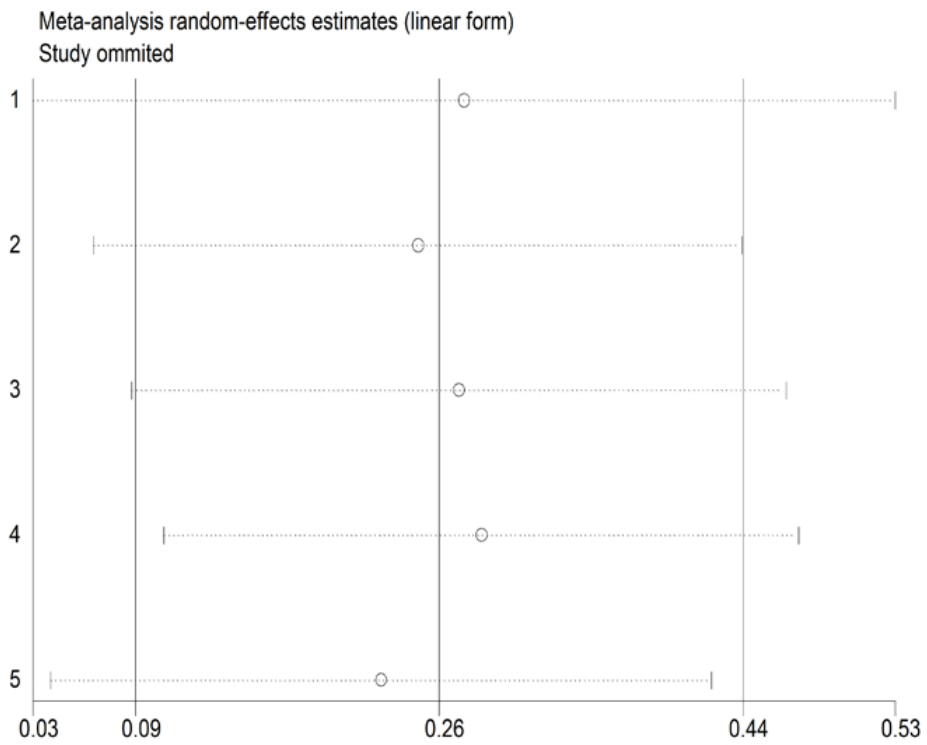

1  
2  
3  
4  
5  
6  
7  
8  
9  
10  
11  
12  
13  
14  
15  
16  
17  
18  
19  
20  
21  
22  
23  
24  
25  
26  
27  
28  
29  
30  
31  
32  
33  
34  
35  
36  
37  
38  
39  
40  
41  
42  
43  
44  
45  
46  
47  
48  
49  
50  
51  
52  
53  
54  
55  
56  
57  
58  
59  
60

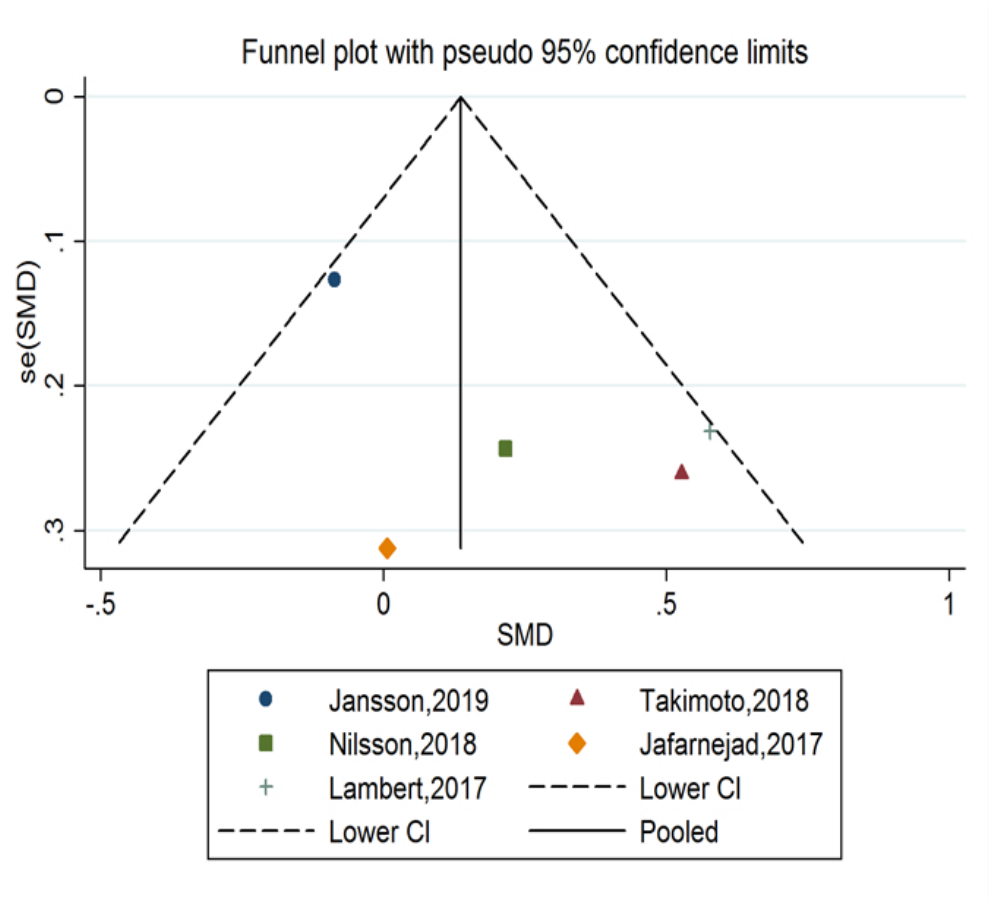

Meta-analysis random-effects estimates (linear form)

Study omitted

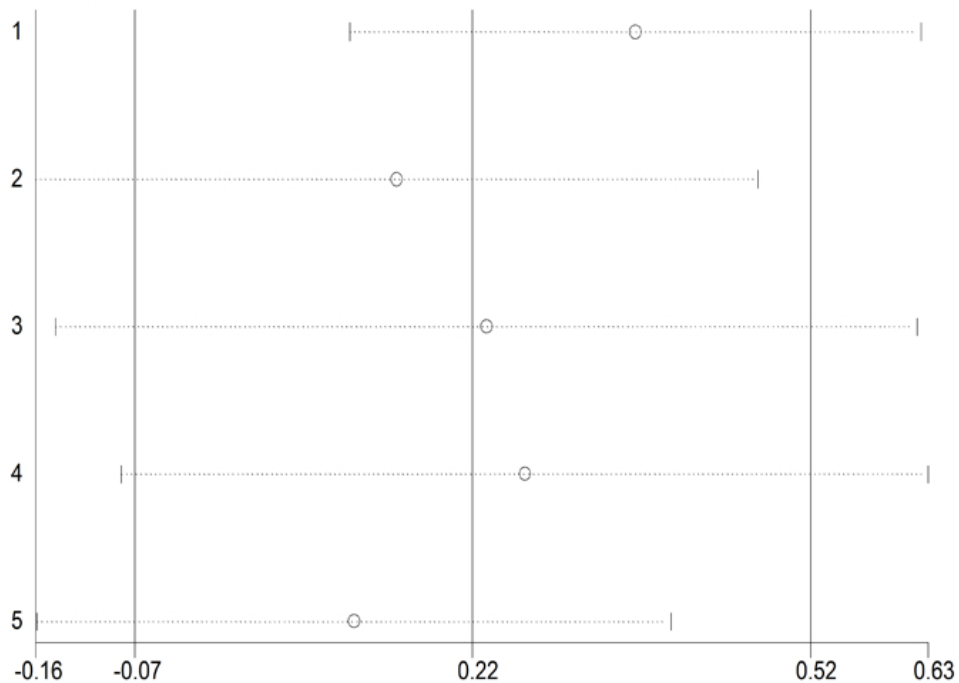



# PRISMA 2009 Checklist

| Section/topic                      | #  | Checklist item                                                                                                                                                                                                                                                                                              | Reported on page #                                                                    |
|------------------------------------|----|-------------------------------------------------------------------------------------------------------------------------------------------------------------------------------------------------------------------------------------------------------------------------------------------------------------|---------------------------------------------------------------------------------------|
| <b>TITLE</b>                       |    |                                                                                                                                                                                                                                                                                                             |                                                                                       |
| Title                              | 1  | Identify the report as a systematic review, meta-analysis, or both.                                                                                                                                                                                                                                         | 1                                                                                     |
| <b>ABSTRACT</b>                    |    |                                                                                                                                                                                                                                                                                                             |                                                                                       |
| Structured summary                 | 2  | Provide a structured summary including, as applicable: background; objectives; data sources; study eligibility criteria, participants, and interventions; study appraisal and synthesis methods; results; limitations; conclusions and implications of key findings; systematic review registration number. | 2                                                                                     |
| <b>INTRODUCTION</b>                |    |                                                                                                                                                                                                                                                                                                             |                                                                                       |
| Rationale                          | 3  | Describe the rationale for the review in the context of what is already known.                                                                                                                                                                                                                              | 3-4                                                                                   |
| Objectives                         | 4  | Provide an explicit statement of questions being addressed with reference to participants, interventions, comparisons, outcomes, and study design (PICOS).                                                                                                                                                  | 3-4                                                                                   |
| <b>METHODS</b>                     |    |                                                                                                                                                                                                                                                                                                             |                                                                                       |
| Protocol and registration          | 5  | Indicate if a review protocol exists, if and where it can be accessed (e.g., Web address), and, if available, provide registration information including registration number.                                                                                                                               | <a href="http://www.crd.york.ac.uk/PROSPERO/">http://www.crd.york.ac.uk/PROSPERO/</a> |
| Eligibility criteria               | 6  | Specify study characteristics (e.g., PICOS, length of follow-up) and report characteristics (e.g., years considered, language, publication status) used as criteria for eligibility, giving rationale.                                                                                                      | 4                                                                                     |
| Information sources                | 7  | Describe all information sources (e.g., databases with dates of coverage, contact with study authors to identify additional studies) in the search and date last searched.                                                                                                                                  | 4                                                                                     |
| Search                             | 8  | Present full electronic search strategy for at least one database, including any limits used, such that it could be repeated.                                                                                                                                                                               | 4                                                                                     |
| Study selection                    | 9  | State the process for selecting studies (i.e., screening, eligibility, included in systematic review, and, if applicable, included in the meta-analysis).                                                                                                                                                   | 4                                                                                     |
| Data collection process            | 10 | Describe method of data extraction from reports (e.g., piloted forms, independently, in duplicate) and any processes for obtaining and confirming data from investigators.                                                                                                                                  | 4                                                                                     |
| Data items                         | 11 | List and define all variables for which data were sought (e.g., PICOS, funding sources) and any assumptions and simplifications made.                                                                                                                                                                       | 4                                                                                     |
| Risk of bias in individual studies | 12 | Describe methods used for assessing risk of bias of individual studies (including specification of whether this was done at the study or outcome level), and how this information is to be used in any data synthesis.                                                                                      | 4                                                                                     |
| Summary measures                   | 13 | State the principal summary measures (e.g., risk ratio, difference in means).                                                                                                                                                                                                                               | 4-5                                                                                   |

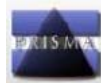

# PRISMA 2009 Checklist

1  
2  
3  
4  
5  
6  
7  
8  
9  
10  
11  
12  
13  
14  
15  
16  
17  
18  
19  
20  
21  
22  
23  
24  
25  
26  
27  
28  
29  
30  
31  
32  
33  
34  
35  
36  
37  
38  
39  
40  
41  
42  
43  
44  
45  
46  
47

|                      |    |                                                                                                                                                           |     |
|----------------------|----|-----------------------------------------------------------------------------------------------------------------------------------------------------------|-----|
| Synthesis of results | 14 | Describe the methods of handling data and combining results of studies, if done, including measures of consistency (e.g., $I^2$ ) for each meta-analysis. | 4-5 |
|----------------------|----|-----------------------------------------------------------------------------------------------------------------------------------------------------------|-----|

Page 1 of 2

| Section/topic                 | #  | Checklist item                                                                                                                                                                                           | Reported on page # |
|-------------------------------|----|----------------------------------------------------------------------------------------------------------------------------------------------------------------------------------------------------------|--------------------|
| Risk of bias across studies   | 15 | Specify any assessment of risk of bias that may affect the cumulative evidence (e.g., publication bias, selective reporting within studies).                                                             | 4-5                |
| Additional analyses           | 16 | Describe methods of additional analyses (e.g., sensitivity or subgroup analyses, meta-regression), if done, indicating which were pre-specified.                                                         | 4-5                |
| <b>RESULTS</b>                |    |                                                                                                                                                                                                          |                    |
| Study selection               | 17 | Give numbers of studies screened, assessed for eligibility, and included in the review, with reasons for exclusions at each stage, ideally with a flow diagram.                                          | 5                  |
| Study characteristics         | 18 | For each study, present characteristics for which data were extracted (e.g., study size, PICOS, follow-up period) and provide the citations.                                                             | 5                  |
| Risk of bias within studies   | 19 | Present data on risk of bias of each study and, if available, any outcome level assessment (see item 12).                                                                                                | 5-6                |
| Results of individual studies | 20 | For all outcomes considered (benefits or harms), present, for each study: (a) simple summary data for each intervention group (b) effect estimates and confidence intervals, ideally with a forest plot. | 5-6                |
| Synthesis of results          | 21 | Present results of each meta-analysis done, including confidence intervals and measures of consistency.                                                                                                  | 5-6                |
| Risk of bias across studies   | 22 | Present results of any assessment of risk of bias across studies (see Item 15).                                                                                                                          | 5-6                |
| Additional analysis           | 23 | Give results of additional analyses, if done (e.g., sensitivity or subgroup analyses, meta-regression [see Item 16]).                                                                                    | 5-6                |
| <b>DISCUSSION</b>             |    |                                                                                                                                                                                                          |                    |
| Summary of evidence           | 24 | Summarize the main findings including the strength of evidence for each main outcome; consider their relevance to key groups (e.g., healthcare providers, users, and policy makers).                     | 6-10               |
| Limitations                   | 25 | Discuss limitations at study and outcome level (e.g., risk of bias), and at review-level (e.g., incomplete retrieval of identified research, reporting bias).                                            | 6-10               |
| Conclusions                   | 26 | Provide a general interpretation of the results in the context of other evidence, and implications for future research.                                                                                  | 6-10               |
| <b>FUNDING</b>                |    |                                                                                                                                                                                                          |                    |
| Funding                       | 27 | Describe sources of funding for the systematic review and other support (e.g., supply of data); role of funders for the systematic review.                                                               | n/a                |

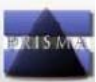

# PRISMA 2009 Checklist

- 1
- 2
- 3
- 4
- 5
- 6
- 7
- 8
- 9
- 10
- 11
- 12
- 13
- 14
- 15
- 16
- 17
- 18
- 19
- 20
- 21
- 22
- 23
- 24
- 25
- 26
- 27
- 28
- 29
- 30
- 31
- 32
- 33
- 34
- 35
- 36
- 37
- 38
- 39
- 40
- 41
- 42
- 43
- 44
- 45
- 46
- 47

For more information, visit: [www.prisma-statement.org](http://www.prisma-statement.org).

Page 2 of 2

For peer review only



# BMJ Open

## Probiotic supplements and bone health in postmenopausal women: a meta-analysis of randomized controlled trials

|                                 |                                                                                                                                                                                                                                                                                                                                                                                                                                                                                                                                                                                                                                                                 |
|---------------------------------|-----------------------------------------------------------------------------------------------------------------------------------------------------------------------------------------------------------------------------------------------------------------------------------------------------------------------------------------------------------------------------------------------------------------------------------------------------------------------------------------------------------------------------------------------------------------------------------------------------------------------------------------------------------------|
| Journal:                        | <i>BMJ Open</i>                                                                                                                                                                                                                                                                                                                                                                                                                                                                                                                                                                                                                                                 |
| Manuscript ID                   | bmjopen-2020-041393.R2                                                                                                                                                                                                                                                                                                                                                                                                                                                                                                                                                                                                                                          |
| Article Type:                   | Original research                                                                                                                                                                                                                                                                                                                                                                                                                                                                                                                                                                                                                                               |
| Date Submitted by the Author:   | 10-Feb-2021                                                                                                                                                                                                                                                                                                                                                                                                                                                                                                                                                                                                                                                     |
| Complete List of Authors:       | Yu, Jiawei; Zhuji Affiliated Hospital of Wenzhou Medical University, Department of Orthopedic Surgery<br>Cao, Gaoyang; Zhejiang University School of Medicine Sir Run Run Shaw Hospital, Department of colorectal surgery<br>Yuan, Shuohui; Zhuji Affiliated Hospital of Wenzhou Medical University, Department of Orthopedic Surgery<br>Luo, Cong; Zhuji Affiliated Hospital of Wenzhou Medical University, Department of Orthopedic Surgery<br>Yu, Jiafeng; Zhuji Affiliated Hospital of Wenzhou Medical University, Department of Orthopedic Surgery<br>Cai, Ming; Zhuji Affiliated Hospital of Wenzhou Medical University, Department of Orthopedic Surgery |
| <b>Primary Subject Heading</b>: | Evidence based practice                                                                                                                                                                                                                                                                                                                                                                                                                                                                                                                                                                                                                                         |
| Secondary Subject Heading:      | Nutrition and metabolism                                                                                                                                                                                                                                                                                                                                                                                                                                                                                                                                                                                                                                        |
| Keywords:                       | Bone diseases < ORTHOPAEDIC & TRAUMA SURGERY, Hip < ORTHOPAEDIC & TRAUMA SURGERY, Spine < ORTHOPAEDIC & TRAUMA SURGERY, NUTRITION & DIETETICS                                                                                                                                                                                                                                                                                                                                                                                                                                                                                                                   |
|                                 |                                                                                                                                                                                                                                                                                                                                                                                                                                                                                                                                                                                                                                                                 |

SCHOLARONE™  
Manuscripts



I, the Submitting Author has the right to grant and does grant on behalf of all authors of the Work (as defined in the below author licence), an exclusive licence and/or a non-exclusive licence for contributions from authors who are: i) UK Crown employees; ii) where BMJ has agreed a CC-BY licence shall apply, and/or iii) in accordance with the terms applicable for US Federal Government officers or employees acting as part of their official duties; on a worldwide, perpetual, irrevocable, royalty-free basis to BMJ Publishing Group Ltd ("BMJ") its licensees and where the relevant Journal is co-owned by BMJ to the co-owners of the Journal, to publish the Work in this journal and any other BMJ products and to exploit all rights, as set out in our [licence](#).

The Submitting Author accepts and understands that any supply made under these terms is made by BMJ to the Submitting Author unless you are acting as an employee on behalf of your employer or a postgraduate student of an affiliated institution which is paying any applicable article publishing charge ("APC") for Open Access articles. Where the Submitting Author wishes to make the Work available on an Open Access basis (and intends to pay the relevant APC), the terms of reuse of such Open Access shall be governed by a Creative Commons licence – details of these licences and which [Creative Commons](#) licence will apply to this Work are set out in our licence referred to above.

Other than as permitted in any relevant BMJ Author's Self Archiving Policies, I confirm this Work has not been accepted for publication elsewhere, is not being considered for publication elsewhere and does not duplicate material already published. I confirm all authors consent to publication of this Work and authorise the granting of this licence.

1  
2  
3  
4 1 **Probiotic supplements and bone health in postmenopausal**  
5  
6 2 **women: a meta-analysis of randomized controlled trials**  
7  
8

9 3 Jiawei Yu<sup>1#</sup>, Gaoyang Cao<sup>2#</sup>, Shuohui Yuan<sup>1</sup>, Cong Luo<sup>1</sup>, Jiafeng Yu<sup>1</sup>, Ming Cai<sup>1\*</sup>  
10  
11 4

12 5 <sup>1</sup> Department of Orthopedic Surgery, Zhuji Affiliated Hospital of Wenzhou Medical  
13 University, Shaoxing, China  
14  
15 6

16 7 <sup>2</sup> Department of Colorectal Surgery, Zhejiang University School of Medicine Sir Run Run  
17 Shaw Hospital, Hangzhou, China  
18  
19 8

20 9  
21  
22 10 \* Corresponding author. Department of Orthopedic Surgery, Zhuji Affiliated Hospital  
23 of Wenzhou Medical University, Shaoxing, 311800, P.R. China.  
24  
25 11

26 12 E-mail address: caiming1208@163.com  
27  
28 13

29 14 # The first two authors contributed equally to the work.  
30  
31 15  
32 16  
33 17  
34 18  
35 19  
36 20  
37 21  
38 22  
39 23  
40 24  
41 25  
42 26  
43 27  
44 28  
45 29  
46 30  
47 31  
48 32  
49 33  
50 34  
51 35  
52 36  
53 37  
54 38  
55 39  
56 40  
57 41  
58 42  
59 43  
60 44

## 30 **Abstract**

31 **Objective:** Osteoporosis is a common disease in postmenopausal women. Several  
32 studies have analyzed the associations between dietary supplementation with  
33 probiotics and bone health in postmenopausal women, but the results are still  
34 controversial. We conducted this meta-analysis to assess the effects of probiotics  
35 supplement on bone mineral density (BMD) and bone turnover markers for  
36 postmenopausal women.

37 **Design:** systematic review and meta-analysis.

38 **Methods:** We systematically searched PubMed, EMBASE, and the Cochrane Library  
39 from their inception to November 2020 for randomized controlled trials (RCTs)  
40 assessing probiotic supplements and osteoporosis in postmenopausal women.  
41 Study-specific risk estimates were combined using random-effect models.

42 **Results:** Five RCTs (n = 497) were included. Probiotic supplements were associated  
43 with a significantly higher BMD in the lumbar spine (standardized mean difference,  
44 SMD = 0.27, 95% CI: 0.09–0.44) than in control. There was no difference between  
45 probiotic supplements and BMD in hips (SMD = 0.22, 95% CI: -0.07 – 0.52).  
46 Collagen type 1 cross-linked C-telopeptide (CTX) levels in the treatment groups were  
47 significantly lower than those of the placebo group (SMD = -0.34, 95% CI: -0.60 –  
48 -0.09). In subgroup meta-analysis, levels of bone-specific alkaline phosphatase  
49 (BALP), osteoprotegerin (OPG), osteocalcin (OC), and tumor necrosis factor (TNF)  
50 did not differ between the probiotic and placebo groups.

51 **Conclusions:** We conclude cautiously that supplementation with probiotics could  
52 increase lumbar BMD. More randomized controlled trials are recommended to  
53 validate or update these results.

## 52 **Strengths and limitations of this study**

54 This is the first meta-analysis on the effectiveness of probiotic supplements on bone  
55 status in postmenopausal women.

56 We included only high-quality randomized controlled trials to improve the level of  
57 evidence.  
58  
59  
60

1  
2  
3  
4 60 The limited number of reports prevented us from conducting subgroup analysis and  
5  
6 61 made it difficult to draw firm conclusions.  
7  
8 62  
9 63

10  
11 64 **Keywords:** probiotics supplement; bone mineral density; bone turnover markers;  
12  
13 65 postmenopausal; meta-analysis  
14  
15 66

16 67

17 68

18 69

19 70

20 71

21 72

22 73

23 74

24 75

25 76

26 77

27 78

28 79

29 80

30 81

31 82

32 83

33 84

34 85

35 86

36 87

37 88

38 89

39

40

41

42

43

## 90 Introduction

91 Osteoporosis is characterized by low bone mineral density (BMD) and deteriorated  
92 bone microstructure, leading to reduced bone strength and increased susceptibility to  
93 fractures<sup>1</sup>. Osteoporosis and fracture occur commonly in postmenopausal women,  
94 who experience a natural decline in endogenous estrogen, reducing BMD (on average  
95 2%–5% BMD/y)<sup>2</sup> and adverse effects on bone microarchitecture.

96 Currently, many medications are used in osteoporosis to decrease bone resorption  
97 or increase bone formation. Large randomized controlled trials (RCTs) showed that  
98 estrogen therapy (such as red clover isoflavone supplementation) was effective for  
99 preventing and treating osteoporosis in postmenopausal women<sup>3-5</sup>. However, this  
100 remains controversial because of the increased risk of cancer, including endometrial,  
101 breast, and ovarian cancer<sup>6</sup>. Nevertheless, other anti-resorptive agents are not widely  
102 used because of their side-effects, high prices, and poor compliance on the part of  
103 patients; these include bisphosphonates, calcitonin, and raloxifene. Therefore,  
104 complementary and dietary therapies are more acceptable to some patients. Also,  
105 natural treatments are increasingly requested by patients.<sup>7</sup> It was shown that calcium  
106 and vitamin D supplements effectively improved bone microarchitecture and health<sup>8</sup>;  
107 however, supplementation with calcium and vitamin alone is not sufficient to halt  
108 menopausal bone loss<sup>9</sup>.

109 Therefore, alternative ways to prevent and treat osteoporosis are sought. Probiotics  
110 are popular dietary therapies that have favorable effects on the skeletal system.<sup>10</sup>  
111 Probiotics are "live microorganisms that when administered in adequate amounts will  
112 confer a health benefit on the host" defined by the Food and Agricultural  
113 Organization/World Health Organization (FAO/WHO)<sup>11</sup>, such as bacillus subtilis,  
114 lactobacillus, and other mixed strains. They are affordable and have fewer  
115 side-effects.

116 To our knowledge, there has been no systematic review or meta-analysis of RCTs  
117 with probiotics in the treatment arms, analyzing the effect of probiotics in  
118 postmenopausal-related osteoporosis. Therefore, this systematic review and  
119 meta-analysis were performed to provide an overview of the effects of dietary

1  
2  
3  
4 120 probiotic supplements in postmenopausal related bone resorption in women and to  
5  
6 121 inform researchers of new potential sources of bias to be addressed in future clinical  
7  
8 122 trials.

## 9 123 **Methods and analysis**

### 10 124 **Data sources and search strategies**

11  
12  
13 125 A literature search of relevant studies was performed in PubMed, EMBASE, and  
14  
15 126 the Cochrane Library. A comprehensive search strategy was developed. The protocol  
16  
17 127 was drafted according to the PRISMA statement<sup>12</sup>. The keywords were as follows:  
18  
19 128 'probiotics', 'probiotic supplement', 'bone,' 'osteoporosis', 'osteopenia', 'bone mineral  
20  
21 129 density', 'bone turnover', and 'postmenopausal' (search queries available in  
22  
23 130 Supplementary Table 1). References of retrieved articles were also scanned to identify  
24  
25 131 any additional relevant studies. Two independent reviewers (Jiawei Yu and Gaoyang  
26  
27 132 Cao) conducted this work. Discrepancies were resolved by consensus of the two  
28  
29 133 reviewers. If required, the final disposition was determined by Ming Cai.

### 30 134 **Inclusion and exclusion criteria**

31  
32  
33 135 Inclusion criteria are as follows: (1) randomized controlled trials and prospective  
34  
35 136 cohort studies; (2) consideration of postmenopausal women as patients, consideration  
36  
37 137 of probiotic supplement as interventions, consideration of placebo as a comparison,  
38  
39 138 and consideration of the change of BMD and bone turnover markers (BTM) as  
40  
41 139 outcomes; (3) BMD was measured by dual-energy X-ray absorptiometry (DXA) and  
42  
43 140 BTM was measured using blood tests at baseline, and the end of trial; (4)  
44  
45 141 administered probiotics for more than 6 months; and (5) English language original  
46  
47 142 articles indexed up to November 2020.

48  
49 143 Exclusion criteria are as follows: (1) absence of critical data for meta-analysis; and  
50  
51 144 (2) low-quality articles according to Cochrane checklist.

### 52 145 **Data extraction and quality assessment**

53  
54 146 The characteristics of the relevant articles were extracted and recorded  
55  
56 147 independently by two reviewers (Jiawei Yu and Gaoyang Cao) as follows: first  
57  
58 148 author's name, year, area, age (mean or range), type of probiotic supplement, dose  
59  
60 149 design, course of treatment, number of cases, number of controls, and bone status (as

1  
2  
3  
4 150 shown in Table 1). The Cochrane Collaboration's tool <sup>13</sup> was used for assessing the  
5  
6 151 risk of bias. Six domain-based evaluations (selection bias, performance bias, detection  
7  
8 152 bias, attrition bias, reporting bias, and other bias) were used in the tool to assess the  
9  
10 153 possible bias of randomized controlled trials. The results were displayed as low risk,  
11  
12 154 unclear risk, or high risk of bias.

### 13 155 **Statistical analysis**

156 The mean relative change from baseline to the end of the course and standard  
157 deviation (SD) were used to express the effect of the probiotic supplement on bone  
158 status in postmenopausal women. If the original studies did not provide the mean  
159 relative change and standard deviation, we converted the data using a common  
160 method <sup>14-15</sup>. The pooled effects of included studies were expressed in terms of  
161 standardized mean difference (SMD) with 95% confidence interval (CI). Q test and  $I^2$   
162 index were used to evaluate heterogeneity among the included results.  
163 Meta-regression was conducted to determine whether different types of probiotic  
164 supplements would introduce sources of heterogeneity. Random-effects model and  
165 subgroup analysis were used in the face of heterogeneity. Forest plots and funnel plots  
166 were produced, and publication bias was tested using Begg's test and the weighted  
167 Egger test <sup>16-17</sup>. Sensitivity analysis was conducted to verify the impact of each study  
168 on the pooled results. In the sensitivity analyses, each study was omitted to recalculate  
169 the pooled estimates. All analysis was performed using STATA 12.0 (StataCorp LP,  
170 College Station, TX, USA).

### 171 **Patient and public involvement**

172 Patient and public involvement is not applicable for this meta-analysis.

### 173 **Results**

#### 174 **Search results and characteristics of identified studies**

175 A total of 604 articles were identified from the initial searches of PubMed and  
176 EMBASE, and 547 articles were removed because of absence of relevance. Nine  
177 articles were retained after reviewing the abstract according to the exclusion criteria.  
178 Finally, five randomized controlled trials<sup>18-22</sup> satisfied the inclusion criteria and  
179 entered this meta-analysis after full-text review. All the five RCTs had low risk of



1  
2  
3  
4 180 bias (available in Supplementary Table 2).

5  
6 181 A detailed overview of the selection process is outlined in Figure 1.

7  
8 182 A total of 497 postmenopausal women completed these trials. Among the five  
9  
10 183 trials, two were conducted in Asia (one in Japan<sup>18</sup>, the other in Iran<sup>20</sup>), and the other  
11  
12 184 three were in Europe (two in Sweden<sup>19 22</sup>, the last one in Denmark<sup>21</sup>). All trials were  
13  
14 185 randomized using the double-blinded method. Each trial identified the type of  
15  
16 186 probiotic supplements used and described the dosage design. Three studies considered  
17  
18 187 treatment with probiotics only<sup>18-20</sup>, while the other two studies included treatment  
19  
20 188 with combined isoflavone and probiotics<sup>21 22</sup>. All studies provided BMD data from  
21  
22 189 DXA scans at the lumbar spine and total hip. Collagen type 1 cross-linked  
23  
24 190 C-telopeptide (CTX), bone-specific alkaline phosphatase (BALP), osteoprotegerin  
25  
26 191 (OPG), osteocalcin (OC), and tumor necrosis factor (TNF) were used as bone  
27  
28 192 turnover markers. Details of the characteristics are displayed in Table 1 and  
29  
30 193 Supplementary Table 3.

#### 31 194 **Probiotic supplements and lumbar spine BMD**

32  
33 195 A total of five estimates were included in the meta-analysis. The meta-regression  
34  
35 196 results also showed no source of heterogeneity from various types of probiotics ( $P =$   
36  
37 197  $0.987$ ). Therefore, the five estimates were incorporated into the pooled analysis.  
38  
39 198 Compared to the placebo group, the lumbar spine BMD level of the supplementary  
40  
41 199 group was higher (SMD = 0.26, 95% CI: 0.09 – 0.44), with no heterogeneity ( $P =$   
42  
43 200  $0.805$ ;  $I^2 = 0.0$ ) (Figure 2). The funnel plot was symmetrical (Supplementary Figure 1)  
44  
45 201 and excluded publication bias (Begg's test  $z_c = 0.73$ ,  $P = 0.462$ ; Egger's test  $t = -0.22$ ,  
46  
47 202  $P = 0.843$ ). Sensitivity analyses indicated that the positive result was robust.  
48  
49 203 (Supplementary Figure 2).

#### 50 204 **Probiotics supplements and total hip BMD**

51  
52 205 Overall, five estimates of the association between probiotics supplement and hip  
53  
54 206 BMD were included in the meta-analysis. The meta-regression results revealed that  
55  
56 207 various types of probiotics were not a source of heterogeneity ( $P = 0.237$ ). Therefore,  
57  
58 208 we brought the five estimates into the pooled analysis. There was no difference  
59  
60 209 between probiotic supplements and BMD in hips (SMD = 0.22, 95% CI: -0.07 –

1  
2  
3  
4 210 0.52), with no heterogeneity ( $P = 0.055$ ;  $I^2 = 56.8$ ) (Figure 3). The funnel plot is  
5  
6 211 shown in Supplementary Figure 3; it was symmetrical, excluding publication bias  
7  
8 212 (Begg's test  $z_c = -0.24$ ,  $P = 1.00$ ; Egger's test  $t = 1.59$ ,  $P = 0.209$ ). Sensitivity analyses  
9  
10 213 indicated that the positive result was affected by the Jansson trial (Supplementary  
11  
12 214 Figure 4).

### 215 **Probiotic supplements and bone turnover markers**

15 216 Four estimates of CTX and two estimates of BALP, OPG, OC, and TNF were  
16  
17 217 incorporated into the pooled analysis. The results suggested that probiotic  
18  
19 218 supplements help decrease the supplementary group's body CTX level compared with  
20  
21 219 the placebo group (SMD = -0.34, 95% CI: -0.60 – -0.09) with substantial  
22  
23 220 heterogeneity. There was no evidence that probiotic supplements were associated with  
24  
25 221 BALP, OPG, OC, and TNF (Figure 4).

### 222 **Discussion**

#### 223 **Main findings**

30  
31 224 This meta-analysis included five randomized controlled trials with low risk of bias  
32  
33 225 and 497 postmenopausal women. The results provides evidence that dietary probiotics  
34  
35 226 supplement can slow bone resorption in postmenopausal women. Daily  
36  
37 227 supplementation with probiotics for 24 weeks to 12 months significantly decreased  
38  
39 228 bone turnover marker CTX (compared to placebo) in postmenopausal women. BMD  
40  
41 229 loss at the lumbar spine was significantly lower in the treatment group.

42  
43 230 Bone loss occurs throughout life following maturation and is accelerated following  
44  
45 231 menopause in women<sup>23</sup>. Postmenopausal women have an increased risk of fragility  
46  
47 232 fractures. Using a naturally-occurring bacterium to significantly reduce the annual  
48  
49 233 bone loss in this group of patients is a new concept that could lead to a paradigm shift  
50  
51 234 in osteoporosis prevention. Previous studies in animals demonstrated that  
52  
53 235 supplementation with specific bacterial strains increases bone density and protect  
54  
55 236 against osteoporosis<sup>24-26</sup>. Kim et al. reported that the administration of *Lactobacillus*  
56  
57 237 *casei* 393 significantly increased BMD in ovariectomized rats<sup>27</sup>. For the first time, the  
58  
59 238 present meta-analysis systemically demonstrated that this probiotic also works in  
60  
239 humans.

1  
2  
3  
4 240 The lumbar spine and hip are the most suitable organs to assess bone metabolism.  
5  
6 241 The vertebrae and metaphyses of long bones, rich in trabecular bone, have a higher  
7  
8 242 turnover rate than cortical bones in the axis of long bones. Therefore, medications and  
9  
10 243 diseases affecting the lumbar spine and hip are identified earlier than in other skeletal  
11  
12 244 segments <sup>28</sup>. The vertebrae and hips are easily accessible for measuring BMD.  
13  
14 245 Therefore, the lumbar spine and hip BMD were suitable primary outcome variables in  
15  
16 246 the present studies. McCabe et al <sup>29</sup> showed that oral administration of *Lactobacillus*  
17  
18 247 probiotics identified a 45% increase in hip and vertebral trabecular bone volume  
19  
20 248 fraction in male mice. In another study, the administration of *Lactobacillus plantarum*  
21  
22 249 and *Lactobacillus paracasei* to ovariectomized mice showed increased trabecular  
23  
24 250 number compared to sham-ovariectomized control groups <sup>30</sup>. Our meta-analysis  
25  
26 251 showed, in the probiotics group, both total hip and lumbar vertebrae BMD were at  
27  
28 252 significantly higher levels than those of the control.

29 253 CTX and BALP were chosen as critical bone turnover markers. Because BMD  
30  
31 254 depends on the dynamic balance of bone formation and resorption, bone turnover  
32  
33 255 markers are also important parameters analyzed in our meta-analysis. The  
34  
35 256 measurement of CTX has been taken as a marker of bone resorption; osteoclasts  
36  
37 257 produce it during bone resorption <sup>31</sup>. Therefore, the increased levels of serum CTX  
38  
39 258 indicated increased bone resorption. Subgroup included 3 RCT studies, suggesting  
40  
41 259 that probiotic supplements' ingestion significantly reduced the bone resorption marker  
42  
43 260 CTX. Another study from Japan <sup>18</sup> showed that the probiotics group had significantly  
44  
45 261 lower uNTx (urinary type I collagen cross-linked N-telopeptide) levels than the  
46  
47 262 placebo group at 12 weeks of treatment. uNTx is another fragment of type I collagen  
48  
49 263 generated during resorption detected in urine; therefore, this also suggested that  
50  
51 264 probiotics inhibit bone resorption by suppressing osteoclast activity. BALP is another  
52  
53 265 well-known bone turnover marker, an indicator of osteoblast proliferation that is  
54  
55 266 thought to be a bone formation marker <sup>32</sup>. However, the present meta-analysis showed  
56  
57 267 no significant changes in BALP. Similarly, no differences were detected in levels of  
58  
59 268 biochemical markers for bone metabolic indices (OPG, OC).

60 269 **The mechanism of action**

1  
2  
3  
4 270 The mechanisms of action of probiotics are as follows. Probiotics have many  
5  
6 271 functional properties in humans. They function in the gastrointestinal system by  
7  
8 272 modifying the microbiota composition, intestinal barrier function, and the immune  
9  
10 273 system, which feeds back systemic benefits to the host, including bone health.  
11  
12 274 Moreover, probiotic function modifying physiological homeostasis of the intestinal  
13  
14 275 flora can also benefit bone metabolism<sup>33</sup>. Gastrointestinal inflammation and systemic  
15  
16 276 inflammation are close to enhanced generation of potent osteoclastogenic cytokines as  
17  
18 277 the leading cause of bone loss<sup>34-35</sup>. Probiotics can restore the balance of the gut  
19  
20 278 microbiota, preventing or moderating gut and systemic inflammation and allowing  
21  
22 279 absorption of nutrients, especially in older adults<sup>36</sup>.

23  
24 280 Furthermore, probiotics decrease levels of inflammatory mediators and cytokines  
25  
26 281 in the gut and bone marrow<sup>37</sup>. These changes give bone cell signals, including  
27  
28 282 osteoblasts, osteoclasts, and stem cells, significantly affecting bone homeostasis.  
29  
30 283 Endocrine factors (such as serotonin and incretins) secreted by the intestine also  
31  
32 284 remarkably affect bone cells<sup>38</sup>. Anti-inflammatory effects are among the underlying  
33  
34 285 mechanisms by which probiotics benefit bone metabolism. There is evidence that  
35  
36 286 arginine deiminase, produced by the probiotic *Lactobacillus brevis* CD2, has an  
37  
38 287 anti-inflammatory effect<sup>39</sup>. Supplementation of probiotics may reduce the expression  
39  
40 288 of pro-inflammatory and osteolytic cytokines, including TNF- $\alpha$ . These cytokines alter  
41  
42 289 anti-osteoclastogenic cytokine expression, leading to enhanced osteoclast formation  
43  
44 290 and inhibited osteoblast activity<sup>40</sup>. Some studies found that probiotic supplementation  
45  
46 291 reduces TNF $\alpha$ , IL-17, and RANKL expression levels in ovariectomized mice<sup>41</sup>.  
47  
48 292 These changes give bone cell signals, such as osteoblasts, osteoclasts, and stem cells,  
49  
50 293 significantly affecting bone homeostasis. More clinical trials are needed in the future  
51  
52 294 to elucidate the relationship between the administration of probiotics and  
53  
54 295 anti-inflammatory effects.

#### 54 296 **Limitations and Strengths**

56 297 Our study has some limitations. First, only five randomized controlled trials with  
57  
58 298 specific population groups satisfied our inclusion criteria. The limited number of  
59  
60 299 reports and specific population groups focusing on the association between the

1  
2  
3  
4 300 probiotic supplement and BMD and bone turnover markers prevented us from  
5  
6 301 conducting subgroup analysis and drawing conclusive summaries. Furthermore, the  
7  
8 302 insufficient number of estimates inflates the impact of the results of a particular study  
9  
10 303 and the conclusions may change on the publication of future studies. Second, although  
11  
12 304 meta-regression was used to determine that various types of probiotic supplements did  
13  
14 305 not impact the pooled results, dosage design and course of treatment could also  
15  
16 306 introduce bias. Third, in Lambert's study <sup>21</sup>, probiotics plus isoflavones were used as a  
17  
18 307 treatment regimen, rather than probiotics alone. This may cause some bias; however,  
19  
20 308 we did not want to ignore this valuable study. Third, the units describing BMD  
21  
22 309 change were inconsistent among the five reports. Nilsson's study <sup>19</sup> and Jansson's  
23  
24 310 study <sup>22</sup> applied T score to describe BMD change, while the other three studies used  
25  
26 311 g/cm<sup>2</sup> instead. We could only calculate SMD rather than the weighted mean  
27  
28 312 difference (WMD). Fifth, unfortunately, we did not find a relevant prospective cohort  
29  
30 313 for this meta-analysis. Thus, our results of a meta-analysis should be interpreted with  
31  
32 314 caution.

33  
34 315 Our research also has some strengths. First, to our knowledge, this is the first  
35  
36 316 meta-analysis describing the evidence of the association of probiotic supplements and  
37  
38 317 bone status in postmenopausal women. Second, there is little heterogeneity between  
39  
40 318 the included articles and the fixed-effects model used to calculate the results. Third,  
41  
42 319 all included randomized controlled trials were of high quality.

#### 43 320 Implications and future research

44  
45 321 This systematic review and meta-analysis are useful for multidisciplinary clinicians  
46  
47 322 to evaluate their practices and make a proper clinical decision. The beneficial effects  
48  
49 323 of probiotic supplements may infect probiotic indication in postmenopausal women  
50  
51 324 with osteoporosis. More RCT studies from different regions are needed to validate our  
52  
53 325 argument and help answer research questions about probiotic supplements, dose, and  
54  
55 326 the optimal duration.

#### 56 327 **Conclusion**

57  
58 328 Our systematic review and meta-analysis showed that probiotic supplementations in  
59  
60 329 postmenopausal women were associated with preserving lumbar spine BMD. The

1  
2  
3  
4 330 results should be interpreted with caution and more high quality RCTs are needed to  
5 331 validate or update these results. An appropriate supplement of probiotics could be  
6 332 recommended to improve bone status in postmenopausal women.  
7  
8  
9

10 333

11 334

### 12 335 **Acknowledgments**

13 336 The authors thank the researchers of the included articles for information relevant to  
14 337 the analysis. We appreciate the help from Robert P Lindeman for revising the  
15 338 language in this manuscript.  
16  
17  
18  
19  
20

21 339

### 22 340 **Contributors**

23 341 MC and JY(Jiawei Yu) conceived and designed the meta-analysis; GC, SY and CL  
24 342 searched the literature; JY(Jiawei Yu), GC, and SY analyzed the data; JY(Jiawei Yu)  
25 343 contributed analysis tools; JY(Jiawei Yu) and GC wrote the paper; JY(Jiafeng Yu)  
26 344 and MC revised the manuscript.  
27  
28  
29  
30  
31

### 32 345 **Funding**

33 346 None  
34  
35

### 36 347 **Competing interests**

37 348 The authors declare no conflicts of interest. This study does not contain human  
38 349 participants or animals.  
39  
40

### 41 350 **Patient consent for publication**

42 351 Not required  
43  
44

### 45 352 **Provenance and peer review**

46 353 Not commissioned; externally peer-reviewed  
47  
48

### 49 354 **Data availability statement**

50 355 All data relevant to the study are included in the article or uploaded as supplementary  
51 356 information. No additional data are available.  
52  
53  
54  
55

56 357

57 358

58 359  
59  
60



360

361

362

## References

- 363 1. John A. Kanis. Diagnosis of osteoporosis and assessment of fracture risk. *The Lancet*  
364 2002;359(9321):1929-36.2002-01-01].
- 365 2. J. S. Finkelstein, S. E. Brockwell, V. Mehta, et al. Bone mineral density changes during the  
366 menopause transition in a multiethnic cohort of women. *J Clin Endocrinol Metab*  
367 2008;93(3):861-68. doi: 10.1210/jc.2007-1876 pmid:181604672008-03-01].
- 368 3. J. Chen, X. Liu. [Effects on blood fat and bone density of postmenopausal women fed by soy  
369 protein with isoflavone]. *Zhonghua Yi Xue Za Zhi* 2014;94(3):215-17.  
370 pmid:247314672014-01-21].
- 371 4. P. B. Clifton-Bligh, M. L. Nery, R. J. Clifton-Bligh, et al. Red clover isoflavones enriched with  
372 formononetin lower serum LDL cholesterol-a randomized, double-blind, placebo-controlled study.  
373 *EUR J CLIN NUTR* 2015;69(1):134-42. doi: 10.1038/ejcn.2014.207 pmid:253698312015-01-01].
- 374 5. A. C. Thorup, M. N. Lambert, H. S. Kahr, M. Bjerre, P. B. Jeppesen. Intake of Novel Red Clover  
375 Supplementation for 12 Weeks Improves Bone Status in Healthy Menopausal Women. *Evid*  
376 *Based Complement Alternat Med* 2015;2015:689138. doi: 10.1155/2015/689138  
377 pmid:262659262015-01-20].
- 378 6. J. Simin, R. Tamimi, J. Lagergren, H. O. Adami, N. Brusselaers. Menopausal hormone therapy  
379 and cancer risk: An overestimated risk? *EUR J CANCER* 2017;84:60-68. doi:  
380 10.1016/j.ejca.2017.07.012 pmid:28783542.[Copyright (c) 2017 Elsevier Ltd. All rights  
381 reserved.:\*2017-10-01].
- 382 7. P. De Franciscis, N. Colacurci, G. Riemma, et al. A Nutraceutical Approach to Menopausal  
383 Complaints. *Medicina (Kaunas)* 2019;55(9) doi: 10.3390/medicina55090544  
384 pmid:314663812019-08-28].
- 385 8. S. Boonen, D. Vanderschueren, P. Haentjens, P. Lips. Calcium and vitamin D in the prevention  
386 and treatment of osteoporosis - a clinical update. *J INTERN MED* 2006;259(6):539-52. doi:  
387 10.1111/j.1365-2796.2006.01655.x pmid:167045542006-06-01].
- 388 9. S. Gonnelli, C. Cepollaro, C. Pondrelli, et al. Bone turnover and the response to alendronate  
389 treatment in postmenopausal osteoporosis. *Calcif Tissue Int* 1999;65(5):359-64.  
390 pmid:105417601999-11-01].
- 391 10. M. M. Zaiss, R. M. Jones, G. Schett, R. Pacifici. The gut-bone axis: how bacterial metabolites  
392 bridge the distance. *J CLIN INVEST* 2019;129(8):3018-28. doi: 10.1172/JCI128521  
393 pmid:313052652019-07-15].
- 394 11. Food And Agriculture Organization Organization. Guidelines for the Evaluation of Probiotics in  
395 Food: Report of a Joint FAO/WHO Working Group. In. Ontario, Canada: Food and Agriculture  
396 Organization of the United Nations and World Health Organization, 2002.
- 397 12. D. Moher, A. Liberati, J. Tetzlaff, D. G. Altman. Preferred reporting items for systematic reviews  
398 and meta-analyses: the PRISMA statement. *PLOS MED* 2009;6(7):e1000097. doi:  
399 10.1371/journal.pmed.1000097 pmid:196210722009-07-21].
- 400 13. Green S. Editors Higgins JPT. Cochrane Handbook for Systematic Reviews of Interventions  
401 Version 5.1.0 [updated March 2011]. In: The Cochrane Collaboration, 2011.

- 1  
2  
3 402 14. Pagano M. GK. Principles of Biostatistics. Second Edition, ed: Duxbury 2000.  
4 403 15. L. Kaiser. Adjusting for baseline: change or percentage change? *STAT MED* 1989;8(10):1183-90.  
5 404 pmid:26829091989-10-01].  
6 405 16. C. B. Begg, M. Mazumdar. Operating characteristics of a rank correlation test for publication bias.  
7 406 *BIOMETRICS* 1994;50(4):1088-101. pmid:77869901994-12-01].  
8 407 17. M. Egger, G. D. Smith. Bias in location and selection of studies. *BMJ* 1998;316(7124):61-66. doi:  
9 408 10.1136/bmj.316.7124.61 pmid:94512741998-01-03].  
10 409 18. T. Takimoto, M. Hatanaka, T. Hoshino, et al. Effect of Bacillus subtilis C-3102 on bone mineral  
11 410 density in healthy postmenopausal Japanese women: a randomized, placebo-controlled,  
12 411 double-blind clinical trial. *Biosci Microbiota Food Health* 2018;37(4):87-96. doi:  
13 412 10.12938/bmfh.18-006 pmid:303701922018-01-20].  
14 413 19. A. G. Nilsson, D. Sundh, F. Backhed, M. Lorentzon. Lactobacillus reuteri reduces bone loss in  
15 414 older women with low bone mineral density: a randomized, placebo-controlled, double-blind,  
16 415 clinical trial. *J INTERN MED* 2018;284(3):307-17. doi: 10.1111/joim.12805 pmid:29926979.[(c)  
17 416 2018 The Authors. Journal of Internal Medicine published by John Wiley & Sons Ltd on behalf of  
18 417 Association for Publication of The Journal of Internal Medicine.:\*2018-09-01].  
19 418 20. S. Jafarnejad, K. Djafarian, M. R. Fazeli, et al. Effects of a Multispecies Probiotic Supplement on  
20 419 Bone Health in Osteopenic Postmenopausal Women: A Randomized, Double-blind, Controlled  
21 420 Trial. *J AM COLL NUTR* 2017;36(7):497-506. doi: 10.1080/07315724.2017.1318724  
22 421 pmid:286283742017-09-01].  
23 422 21. MNT Lambert, C. B. Thybo, S. Lykkeboe, et al. Combined bioavailable isoflavones and  
24 423 probiotics improve bone status and estrogen metabolism in postmenopausal osteopenic women: a  
25 424 randomized controlled trial. *AM J CLIN NUTR* 2017;106(3):909-20. doi:  
26 425 10.3945/ajcn.117.153353 pmid:28768651.[(c) 2017 American Society for  
27 426 Nutrition.:\*2017-09-01].  
28 427 22. Per-Anders Jansson, Dan Curiac, Irini Lazou Ahrén, et al. Probiotic treatment using a mix of three  
29 428 Lactobacillus strains for lumbar spine bone loss in postmenopausal women: a randomised,  
30 429 double-blind, placebo-controlled, multicentre trial. *The Lancet Rheumatology*  
31 430 2019;1(3):e154-62.2019-01-01].  
32 431 23. D. Bliuc, N. D. Nguyen, D. Alarkawi, et al. Accelerated bone loss and increased post-fracture  
33 432 mortality in elderly women and men. *Osteoporos Int* 2015;26(4):1331-39. doi:  
34 433 10.1007/s00198-014-3014-9 pmid:256004732015-04-01].  
35 434 24. R. Mutuş, N. Kocabagli, M. Alp, et al. The effect of dietary probiotic supplementation on tibial  
36 435 bone characteristics and strength in broilers. *Poult Sci* 2006;85(9):1621-25. doi:  
37 436 10.1093/ps/85.9.1621 pmid:169778482006-09-01].  
38 437 25. R. A. Britton, R. Irwin, D. Quach, et al. Probiotic L. reuteri treatment prevents bone loss in a  
39 438 menopausal ovariectomized mouse model. *J CELL PHYSIOL* 2014;229(11):1822-30. doi:  
40 439 10.1002/jcp.24636 pmid:24677054.[© 2014 Wiley Periodicals, Inc.:\*2014-11-01].  
41 440 26. F. C. Rodrigues, A. S. Castro, V. C. Rodrigues, et al. Yacon flour and Bifidobacterium longum  
42 441 modulate bone health in rats. *J MED FOOD* 2012;15(7):664-70. doi: 10.1089/jmf.2011.0296  
43 442 pmid:225100442012-07-01].  
44 443 27. Jong Gun Kim, Eungsuk Lee, Sae Hun Kim, et al. Effects of a Lactobacillus casei 393 fermented  
45 444 milk product on bone metabolism in ovariectomised rats. *INT DAIRY J*  
46 445 2009;19(11):690-95.2009-01-01].



- 1  
2  
3 446 28. Ego Seeman. Chapter 1 - Modeling and Remodeling: The Cellular Machinery Responsible for the  
4 447 Gain and Loss of Bone's Material and Structural Strength: Academic Press 2008:1-28.
- 6 448 29. L. R. McCabe, R. Irwin, L. Schaefer, R. A. Britton. Probiotic use decreases intestinal  
7 449 inflammation and increases bone density in healthy male but not female mice. *J CELL PHYSIOL*  
8 450 2013;228(8):1793-98. doi: 10.1002/jcp.24340 pmid:23389860.[Copyright (c) 2013 Wiley  
9 451 Periodicals, Inc.:\*2013-08-01].
- 11 452 30. K. Parvaneh, M. Ebrahimi, M. R. Sabran, et al. Probiotics (Bifidobacterium longum) Increase  
12 453 Bone Mass Density and Upregulate Sparc and Bmp-2 Genes in Rats with Bone Loss Resulting  
13 454 from Ovariectomy. *BIOMED RES INT* 2015;2015:897639. doi: 10.1155/2015/897639  
14 455 pmid:263664212015-01-20].
- 16 456 31. P. Szulc, P. D. Delmas. Biochemical markers of bone turnover: potential use in the investigation  
17 457 and management of postmenopausal osteoporosis. *Osteoporos Int* 2008;19(12):1683-704. doi:  
18 458 10.1007/s00198-008-0660-9 pmid:186295702008-12-01].
- 20 459 32. Katharina E. Scholz-Ahrens, Berit Adolphi, Florence Rochat, et al. Effects of probiotics,  
21 460 prebiotics, and synbiotics on mineral metabolism in ovariectomized rats — impact of bacterial  
22 461 mass, intestinal absorptive area and reduction of bone turn-over. *NFS Journal*  
23 462 2016;3:41-50.2016-01-01].
- 25 463 33. V. Tremaroli, F. Backhed. Functional interactions between the gut microbiota and host  
26 464 metabolism. *NATURE* 2012;489(7415):242-49. doi: 10.1038/nature11552  
27 465 pmid:229722972012-09-13].
- 29 466 34. T. Ali, D. Lam, M. S. Bronze, M. B. Humphrey. Osteoporosis in inflammatory bowel disease. *AM*  
30 467 *J MED* 2009;122(7):599-604. doi: 10.1016/j.amjmed.2009.01.022 pmid:195591582009-07-01].
- 32 468 35. T. Ciucci, L. Ibanez, A. Boucoiran, et al. Bone marrow Th17 TNFalpha cells induce osteoclast  
33 469 differentiation, and link bone destruction to IBD. *GUT* 2015;64(7):1072-81. doi:  
34 470 10.1136/gutjnl-2014-306947 pmid:25298539.[Published by the BMJ Publishing Group Limited.  
35 471 For permission to use (where not already granted under a licence) please go to  
36 472 <http://group.bmj.com/group/rights-licensing/permissions>.\*2015-07-01].
- 38 473 36. P. Hemarajata, J. Versalovic. Effects of probiotics on gut microbiota: mechanisms of intestinal  
39 474 immunomodulation and neuromodulation. *Therap Adv Gastroenterol* 2013;6(1):39-51. doi:  
40 475 10.1177/1756283X12459294 pmid:233200492013-01-01].
- 42 476 37. Y. P. Lin, C. H. Thibodeaux, J. A. Pena, G. D. Ferry, J. Versalovic. Probiotic Lactobacillus reuteri  
43 477 suppress proinflammatory cytokines via c-Jun. *INFLAMM BOWEL DIS* 2008;14(8):1068-83. doi:  
44 478 10.1002/ibd.20448 pmid:184258022008-08-01].
- 46 479 38. V. Tremaroli, F. Backhed. Functional interactions between the gut microbiota and host  
47 480 metabolism. *NATURE* 2012;489(7415):242-49. doi: 10.1038/nature11552  
48 481 pmid:229722972012-09-13].
- 50 482 39. T. Maekawa, G. Hajishengallis. Topical treatment with probiotic Lactobacillus brevis CD2  
51 483 inhibits experimental periodontal inflammation and bone loss. *J PERIODONTAL RES*  
52 484 2014;49(6):785-91. doi: 10.1111/jre.12164 pmid:24483135.[(c) 2014 John Wiley & Sons A/S.  
53 485 Published by John Wiley & Sons Ltd.:\*2014-12-01].
- 55 486 40. R. Irwin, T. Lee, V. B. Young, N. Parameswaran, L. R. McCabe. Colitis-induced bone loss is  
56 487 gender dependent and associated with increased inflammation. *INFLAMM BOWEL DIS*  
57 488 2013;19(8):1586-97. doi: 10.1097/MIB.0b013e318289e17b pmid:237028052013-07-01].
- 59 489 41. J. Y. Li, B. Chassaing, A. M. Tyagi, et al. Sex steroid deficiency-associated bone loss is  
60

1  
2  
3  
4  
5  
6  
7  
8  
9  
10  
11  
12  
13  
14  
15  
16  
17  
18  
19  
20  
21  
22  
23  
24  
25  
26  
27  
28  
29  
30  
31  
32  
33  
34  
35  
36  
37  
38  
39  
40  
41  
42  
43  
44  
45  
46  
47  
48  
49  
50  
51  
52  
53  
54  
55  
56  
57  
58  
59  
60

490 microbiota dependent and prevented by probiotics. *J CLIN INVEST* 2016;126(6):2049-63. doi:  
491 10.1172/JCI86062 pmid:271112322016-06-01].

For peer review only

Table 1. Characteristics of included randomized controlled trials in the meta-analysis

| Study      | Year | Area    | Age                | Blinding     | Type of probiotic supplement        | Number of Treatment | Number of Placebo | Course of treatment | BMD                 | BTM                             |
|------------|------|---------|--------------------|--------------|-------------------------------------|---------------------|-------------------|---------------------|---------------------|---------------------------------|
| Jansson    | 2019 | Sweden  | T: 59.1<br>P: 58.1 | double blind | three Lactobacillus strains*        | 126                 | 123               | 12 months           | lumbar spine<br>hip | N/A                             |
| Takimoto   | 2018 | Japan   | T: 57.5<br>P: 57.8 | double blind | bacillus subtilis C-3102            | 31                  | 30                | 6 months            | lumbar spine<br>hip | CTX                             |
| Nilsson    | 2018 | Sweden  | T: 76.4<br>P: 76.3 | double blind | lactobacillus reuteri 6475          | 32                  | 36                | 12 months           | lumbar spine<br>hip | CTX<br>BALP<br>TNF              |
| Jafarnejad | 2017 | Iran    | T: 58.9<br>P: 57.3 | double blind | seven probiotic bacteria species#   | 20                  | 21                | 6 months            | lumbar spine<br>hip | CTX<br>BALP<br>OPG<br>OC<br>TNF |
| Lambert    | 2017 | Denmark | T: 60.8<br>P: 62.9 | double blind | lactic acid bacteria and soflavones | 38                  | 40                | 12 months           | lumbar spine<br>hip | CTX<br>OPG<br>OC                |

BMD: bone mineral density; BTM: bone turnover marker; CTX: collagen type 1 cross-linked C-telopeptide; BALP: bone-specific alkaline phosphatase; OPG: osteoprotegerin; OC: osteocalcin; TNF: tumor necrosis factor; N/A: not available; \* Lactobacillus paracasei DSM 13434, Lactobacillus plantarum DSM 15312, and Lactobacillus plantarum DSM 15313; # Lactobacillus casei, Bifidobacterium longum, Lactobacillus acidophilus, Lactobacillus rhamnosus, Lactobacillus bulgaricus, Bifidobacterium breve, and Streptococcus thermophilus.

1  
2  
3  
4 Figure 1. Flow diagram of the studies search process

5 Figure 2. Forest plots of meta-analysis on probiotics supplements and lumbar spine BMD

6  
7 Figure 3. Forest plots of meta-analysis on probiotics supplements and hip BMD

8  
9 Figure 4. Forest plots of meta-analysis on probiotics supplements and bone turnover markers

10  
11  
12  
13 Supplementary Figure 1. Funnel plots of meta-analysis on probiotics supplements and lumbar  
14 spine BMD

15  
16  
17 Supplementary Figure 2. Sensitivity analyses of meta-analysis on probiotics supplements and  
18 lumbar spine BMD

19  
20 Supplementary Figure 3. Funnel plots of meta-analysis on probiotics supplements and hip  
21 BMD

22  
23 Supplementary Figure 4. Sensitivity analyses of meta-analysis on probiotics supplements and  
24 hip BMD

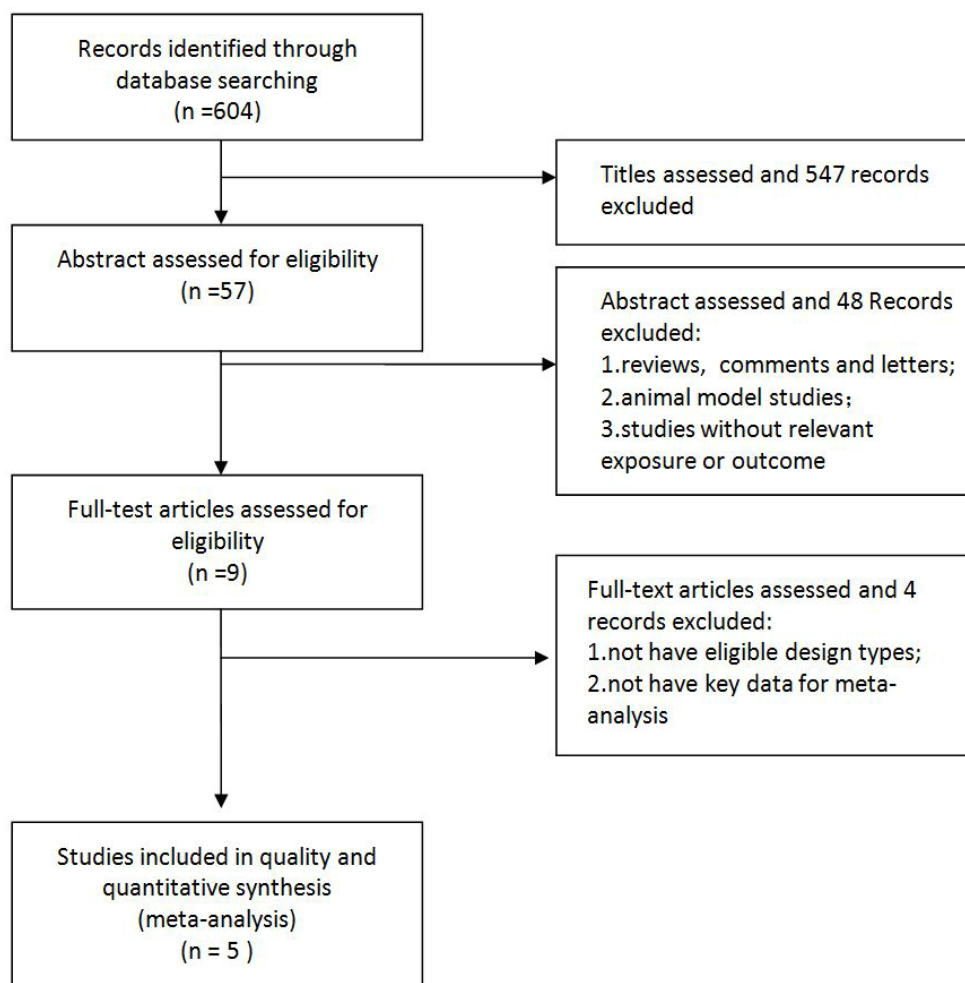

Figure 1. Flow diagram of the studies search process

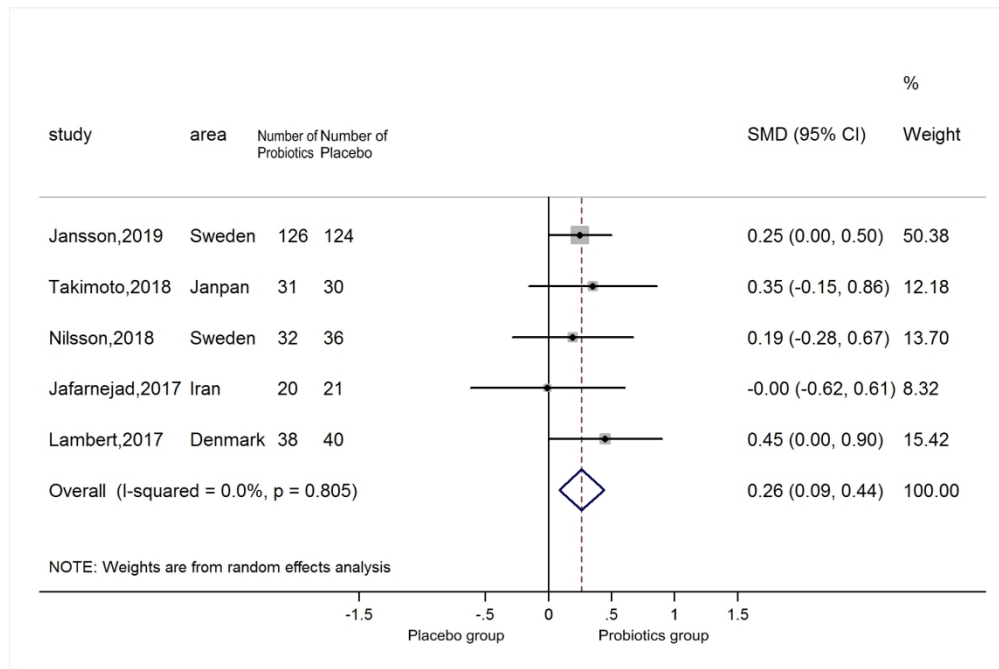

Figure 2. Forest plots of meta-analysis on probiotics supplements and lumbar spine BMD

1  
2  
3  
4  
5  
6  
7  
8  
9  
10  
11  
12  
13  
14  
15  
16  
17  
18  
19  
20  
21  
22  
23  
24  
25  
26  
27  
28  
29  
30  
31  
32  
33  
34  
35  
36  
37  
38  
39  
40  
41  
42  
43  
44  
45  
46  
47  
48  
49  
50  
51  
52  
53  
54  
55  
56  
57  
58  
59  
60



Figure 3. Forest plots of meta-analysis on probiotics supplements and hip BMD

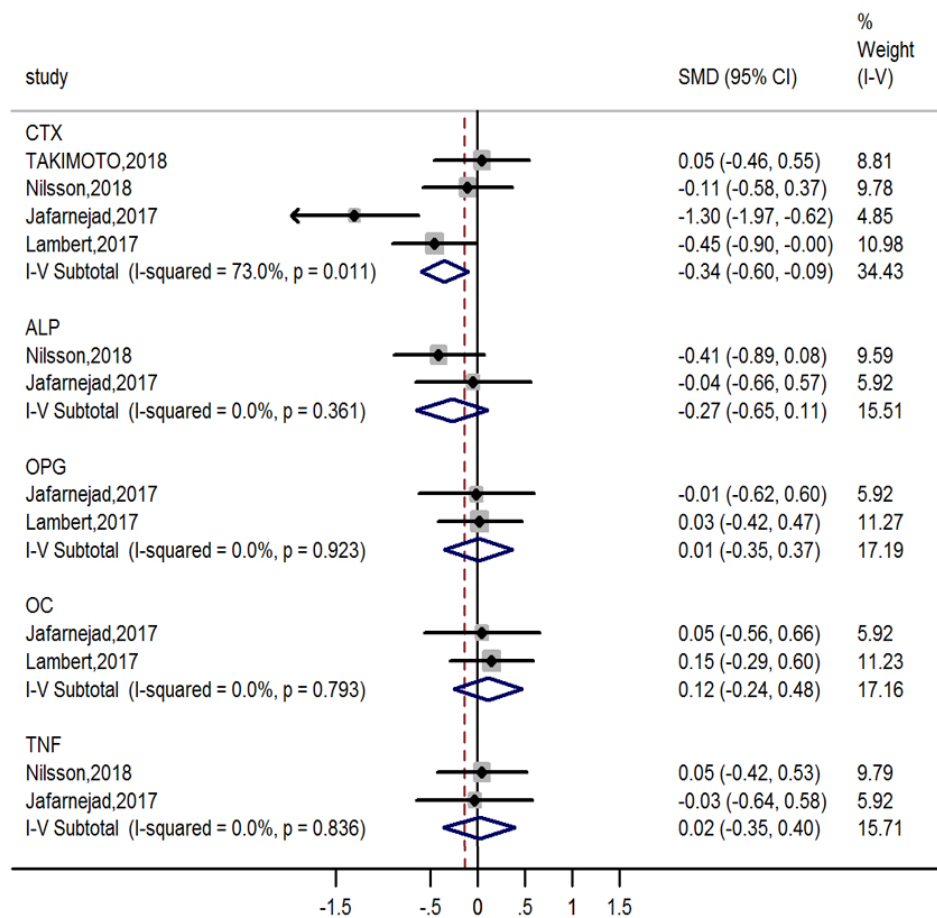

Figure 4. Forest plots of meta-analysis on probiotics supplements and bone turnover markers



Supplementary Table 1 Search strategy of Medline

| #   | Searches             |
|-----|----------------------|
| 1   | Probiotics           |
| 2   | Probiotic supplement |
| 3   | Bone                 |
| 4   | Osteoporosis         |
| 5.  | Osteopenia           |
| 6.  | Bone mineral density |
| 7.  | Bone turnover        |
| 8.  | Postmenopausal       |
| 9.  | 1 and 3 and 8        |
| 10. | 1 and 4 and 8        |
| 11. | 1 and 5 and 8        |
| 12. | 1 and 6 and 8        |
| 13. | 1 and 7 and 8        |
| 14. | 2 and 3 and 8        |
| 15. | 2 and 4 and 8        |
| 16. | 2 and 5 and 8        |
| 17. | 2 and 6 and 8        |
| 18. | 2 and 7 and 8        |

The same strategy for other databases

Supplementary Table 2. Assessment of risk bias of the studies included in the meta-analysis

| Study      | Selection bias             | Selection bias         | Performance bias                       | Detection bias                 | Attrition bias          | Reporting bias      | Overall |
|------------|----------------------------|------------------------|----------------------------------------|--------------------------------|-------------------------|---------------------|---------|
|            | Random sequence generation | Allocation concealment | Blinding of participants and personnel | Blinding of outcome assessment | Incomplete outcome data | Selective reporting |         |
| Jansson    | Low                        | Low                    | Low                                    | Low                            | Low                     | Low                 | Low     |
| Takimoto   | Low                        | Low                    | Low                                    | Low                            | Low                     | Low                 | Low     |
| Nilsson    | Low                        | Unclear                | Low                                    | Low                            | Low                     | Low                 | Low     |
| Jafarnejad | Low                        | Low                    | Low                                    | Low                            | Low                     | Low                 | Low     |
| Lambert    | Low                        | Unclear                | Low                                    | Low                            | Low                     | Low                 | Low     |

Supplementary Table 3. Other characteristics of included randomized controlled trials in the meta-analysis

| Study      | Year | Area    | dose design                      | Minerals intake                                  | Measurement of outcome |
|------------|------|---------|----------------------------------|--------------------------------------------------|------------------------|
| Jansson    | 2019 | Sweden  | 1 x10 <sup>10</sup> CFU/d        | N/A                                              | After 12 months        |
| Takimoto   | 2018 | Japan   | 3.4x10 <sup>9</sup> CFU /d       | BDHQ                                             | After 6 months         |
| Nilsson    | 2018 | Sweden  | 5x10 <sup>9</sup> CFU twice/d    | A standardized questionnaire                     | After 12 months        |
| Jafarnejad | 2017 | Iran    | one Gerilact capsule /d*         | 500 mg Ca plus 200 IU vitamin D daily            | After 6 months         |
| Lambert    | 2017 | Denmark | 60mg isoflavone and probiotics/d | 1200 mg Ca, 550 mg Mg, and 25mg calcitriol daily | After 12 months        |

BDHQ: a brief-type self-administered diet history questionnaire; CFU: colony-forming unit; \*Lactobacillus casei 1.3 x 10<sup>10</sup> CFU, Bifidobacterium longum 5 x 10<sup>10</sup> CFU, Lactobacillus acidophilus 1.5 x 10<sup>10</sup> CFU, Lactobacillus rhamnosus 3.5 x 10<sup>9</sup> CFU, Lactobacillus bulgaricus 2.5 x 10<sup>8</sup> CFU, Bifidobacterium breve 1 x 10<sup>10</sup> CFU, and Streptococcus thermophilus 1.5 x 10<sup>8</sup> CFU per 500 mg.

1  
2  
3  
4  
5  
6  
7  
8  
9  
10  
11  
12  
13  
14  
15  
16  
17  
18  
19  
20  
21  
22  
23  
24  
25  
26  
27  
28  
29  
30  
31  
32  
33  
34  
35  
36  
37  
38  
39  
40  
41  
42  
43  
44  
45  
46  
47  
48  
49  
50  
51  
52  
53  
54  
55  
56  
57  
58  
59  
60



Meta-analysis random-effects estimates (linear form)

Study ommited

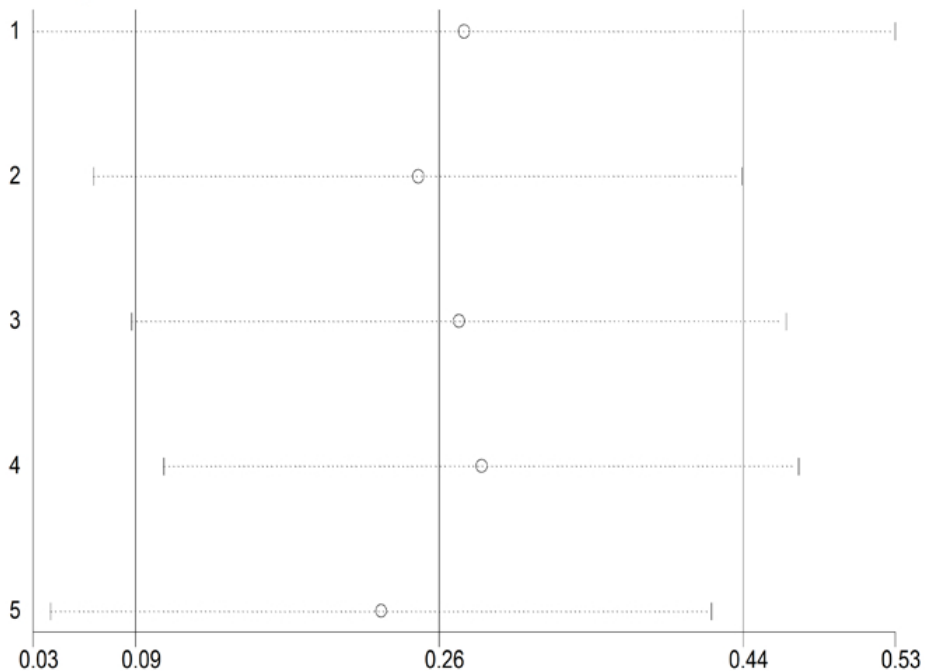

1  
2  
3  
4  
5  
6  
7  
8  
9  
10  
11  
12  
13  
14  
15  
16  
17  
18  
19  
20  
21  
22  
23  
24  
25  
26  
27  
28  
29  
30  
31  
32  
33  
34  
35  
36  
37  
38  
39  
40  
41  
42  
43  
44  
45  
46  
47  
48  
49  
50  
51  
52  
53  
54  
55  
56  
57  
58  
59  
60



Meta-analysis random-effects estimates (linear form)

Study ommited



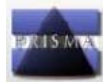

# PRISMA 2009 Checklist

| Section/topic                      | #  | Checklist item                                                                                                                                                                                                                                                                                              | Reported on page # |
|------------------------------------|----|-------------------------------------------------------------------------------------------------------------------------------------------------------------------------------------------------------------------------------------------------------------------------------------------------------------|--------------------|
| <b>TITLE</b>                       |    |                                                                                                                                                                                                                                                                                                             |                    |
| Title                              | 1  | Identify the report as a systematic review, meta-analysis, or both.                                                                                                                                                                                                                                         | 1                  |
| <b>ABSTRACT</b>                    |    |                                                                                                                                                                                                                                                                                                             |                    |
| Structured summary                 | 2  | Provide a structured summary including, as applicable: background; objectives; data sources; study eligibility criteria, participants, and interventions; study appraisal and synthesis methods; results; limitations; conclusions and implications of key findings; systematic review registration number. | 2                  |
| <b>INTRODUCTION</b>                |    |                                                                                                                                                                                                                                                                                                             |                    |
| Rationale                          | 3  | Describe the rationale for the review in the context of what is already known.                                                                                                                                                                                                                              | 4-5                |
| Objectives                         | 4  | Provide an explicit statement of questions being addressed with reference to participants, interventions, comparisons, outcomes, and study design (PICOS).                                                                                                                                                  | 4-5                |
| <b>METHODS</b>                     |    |                                                                                                                                                                                                                                                                                                             |                    |
| Protocol and registration          | 5  | Indicate if a review protocol exists, if and where it can be accessed (e.g., Web address), and, if available, provide registration information including registration number.                                                                                                                               | N/A                |
| Eligibility criteria               | 6  | Specify study characteristics (e.g., PICOS, length of follow-up) and report characteristics (e.g., years considered, language, publication status) used as criteria for eligibility, giving rationale.                                                                                                      | 5                  |
| Information sources                | 7  | Describe all information sources (e.g., databases with dates of coverage, contact with study authors to identify additional studies) in the search and date last searched.                                                                                                                                  | 5                  |
| Search                             | 8  | Present full electronic search strategy for at least one database, including any limits used, such that it could be repeated.                                                                                                                                                                               | 5                  |
| Study selection                    | 9  | State the process for selecting studies (i.e., screening, eligibility, included in systematic review, and, if applicable, included in the meta-analysis).                                                                                                                                                   | 5                  |
| Data collection process            | 10 | Describe method of data extraction from reports (e.g., piloted forms, independently, in duplicate) and any processes for obtaining and confirming data from investigators.                                                                                                                                  | 5-6                |
| Data items                         | 11 | List and define all variables for which data were sought (e.g., PICOS, funding sources) and any assumptions and simplifications made.                                                                                                                                                                       | 5-6                |
| Risk of bias in individual studies | 12 | Describe methods used for assessing risk of bias of individual studies (including specification of whether this was done at the study or outcome level), and how this information is to be used in any data synthesis.                                                                                      | 6                  |
| Summary measures                   | 13 | State the principal summary measures (e.g., risk ratio, difference in means).                                                                                                                                                                                                                               | 6                  |
| Synthesis of results               | 14 | Describe the methods of handling data and combining results of studies, if done, including measures of consistency (e.g., I <sup>2</sup> ) for each meta-analysis.                                                                                                                                          | 6                  |



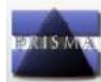

# PRISMA 2009 Checklist

Page 1 of 2

| Section/topic                 | #  | Checklist item                                                                                                                                                                                           | Reported on page # |
|-------------------------------|----|----------------------------------------------------------------------------------------------------------------------------------------------------------------------------------------------------------|--------------------|
| Risk of bias across studies   | 15 | Specify any assessment of risk of bias that may affect the cumulative evidence (e.g., publication bias, selective reporting within studies).                                                             | 6                  |
| Additional analyses           | 16 | Describe methods of additional analyses (e.g., sensitivity or subgroup analyses, meta-regression), if done, indicating which were pre-specified.                                                         | 6                  |
| <b>RESULTS</b>                |    |                                                                                                                                                                                                          |                    |
| Study selection               | 17 | Give numbers of studies screened, assessed for eligibility, and included in the review, with reasons for exclusions at each stage, ideally with a flow diagram.                                          | 6-7                |
| Study characteristics         | 18 | For each study, present characteristics for which data were extracted (e.g., study size, PICOS, follow-up period) and provide the citations.                                                             | 6-7                |
| Risk of bias within studies   | 19 | Present data on risk of bias of each study and, if available, any outcome level assessment (see item 12).                                                                                                | 7                  |
| Results of individual studies | 20 | For all outcomes considered (benefits or harms), present, for each study: (a) simple summary data for each intervention group (b) effect estimates and confidence intervals, ideally with a forest plot. | 7-8                |
| Synthesis of results          | 21 | Present results of each meta-analysis done, including confidence intervals and measures of consistency.                                                                                                  | 7-8                |
| Risk of bias across studies   | 22 | Present results of any assessment of risk of bias across studies (see Item 15).                                                                                                                          | 7-8                |
| Additional analysis           | 23 | Give results of additional analyses, if done (e.g., sensitivity or subgroup analyses, meta-regression [see Item 16]).                                                                                    | 7-8                |
| <b>DISCUSSION</b>             |    |                                                                                                                                                                                                          |                    |
| Summary of evidence           | 24 | Summarize the main findings including the strength of evidence for each main outcome; consider their relevance to key groups (e.g., healthcare providers, users, and policy makers).                     | 8-11               |
| Limitations                   | 25 | Discuss limitations at study and outcome level (e.g., risk of bias), and at review-level (e.g., incomplete retrieval of identified research, reporting bias).                                            | 8-11               |
| Conclusions                   | 26 | Provide a general interpretation of the results in the context of other evidence, and implications for future research.                                                                                  | 8-11               |
| <b>FUNDING</b>                |    |                                                                                                                                                                                                          |                    |
| Funding                       | 27 | Describe sources of funding for the systematic review and other support (e.g., supply of data); role of funders for the systematic review.                                                               | n/a                |

From: Moher D, Liberati A, Tetzlaff J, Altman DG, The PRISMA Group (2009). Preferred Reporting Items for Systematic Reviews and Meta-Analyses: The PRISMA Statement. PLoS Med 6(6): e1000097. doi:10.1371/journal.pmed1000097

For more information, visit: [www.prisma-statement.org](http://www.prisma-statement.org).

Page 2 of 2

For peer review only - <http://bmjopen.bmj.com/site/about/guidelines.xhtml>
