# Supplementary material for: Probiotic supplements and bone health in postmenopausal women: a meta-analysis of randomised controlled trials
Source: PubMed Central journal article supplement — BMJ Open. 2021 Mar 2;11(3):e041393. doi: 10.1136/bmjopen-2020-041393 (PMC7929795; doi:10.1136/bmjopen-2020-041393), 2021-03-02
Supplement: bmjopen-2020-041393supp002.pdf [file bmjopen-2020-041393supp002.pdf]

Supplementary Table 2. Assessment of risk bias of the studies included in the meta-analysis

| Study      | Selection bias             | Selection bias         | Performance bias                       | Detection bias                 | Attrition bias          | Reporting bias      | Overall |
|------------|----------------------------|------------------------|----------------------------------------|--------------------------------|-------------------------|---------------------|---------|
|            | Random sequence generation | Allocation concealment | Blinding of participants and personnel | Blinding of outcome assessment | Incomplete outcome data | Selective reporting |         |
| Jansson    | Low                        | Low                    | Low                                    | Low                            | Low                     | Low                 | Low     |
| Takimoto   | Low                        | Low                    | Low                                    | Low                            | Low                     | Low                 | Low     |
| Nilsson    | Low                        | Unclear                | Low                                    | Low                            | Low                     | Low                 | Low     |
| Jafarnejad | Low                        | Low                    | Low                                    | Low                            | Low                     | Low                 | Low     |
| Lambert    | Low                        | Unclear                | Low                                    | Low                            | Low                     | Low                 | Low     |
