# Supplementary material for: Probiotic supplements and bone health in postmenopausal women: a meta-analysis of randomised controlled trials
Source: HighWire-hosted journal article supplement (doi:10.1136/bmjopen-2020-041393), 2021-03-01
Supplement: bmjopen-2020-041393supp003_data_supplement.pdf [file bmjopen-2020-041393supp003_data_supplement.pdf]

Supplementary Table 3. Other characteristics of included randomized controlled trials in the meta-analysis

| Study      | Year | Area    | dose design                      | Minerals intake                                  | Measurement of outcome |
|------------|------|---------|----------------------------------|--------------------------------------------------|------------------------|
| Jansson    | 2019 | Sweden  | 1 x10 <sup>10</sup> CFU/d        | N/A                                              | After 12 months        |
| Takimoto   | 2018 | Japan   | 3.4x10 <sup>9</sup> CFU /d       | BDHQ                                             | After 6 months         |
| Nilsson    | 2018 | Sweden  | 5x10 <sup>9</sup> CFU twice/d    | A standardized questionnaire                     | After 12 months        |
| Jafarnejad | 2017 | Iran    | one Gerilact capsule /d*         | 500 mg Ca plus 200 IU vitamin D daily            | After 6 months         |
| Lambert    | 2017 | Denmark | 60mg isoflavone and probiotics/d | 1200 mg Ca, 550 mg Mg, and 25mg calcitriol daily | After 12 months        |

BDHQ: a brief-type self-administered diet history questionnaire; CFU: colony-forming unit; \*Lactobacillus casei 1.3 x 10<sup>10</sup> CFU, Bifidobacterium longum 5 x 10<sup>10</sup> CFU, Lactobacillus acidophilus 1.5 x 10<sup>10</sup> CFU, Lactobacillus rhamnosus 3.5 x 10<sup>9</sup> CFU, Lactobacillus bulgaricus 2.5 x 10<sup>8</sup> CFU, Bifidobacterium breve 1 x 10<sup>10</sup> CFU, and Streptococcus thermophilus 1.5 x 10<sup>8</sup> CFU per 500 mg.
