# Supplementary figures and images for: Probiotic supplements and bone health in postmenopausal women: a meta-analysis of randomised controlled trials
Source: PubMed Central journal article supplement — BMJ Open. 2021 Mar 2;11(3):e041393. doi: 10.1136/bmjopen-2020-041393 (PMC7929795; doi:10.1136/bmjopen-2020-041393), 2021-03-02

Meta-analysis random-effects estimates (linear form)

Study omitted

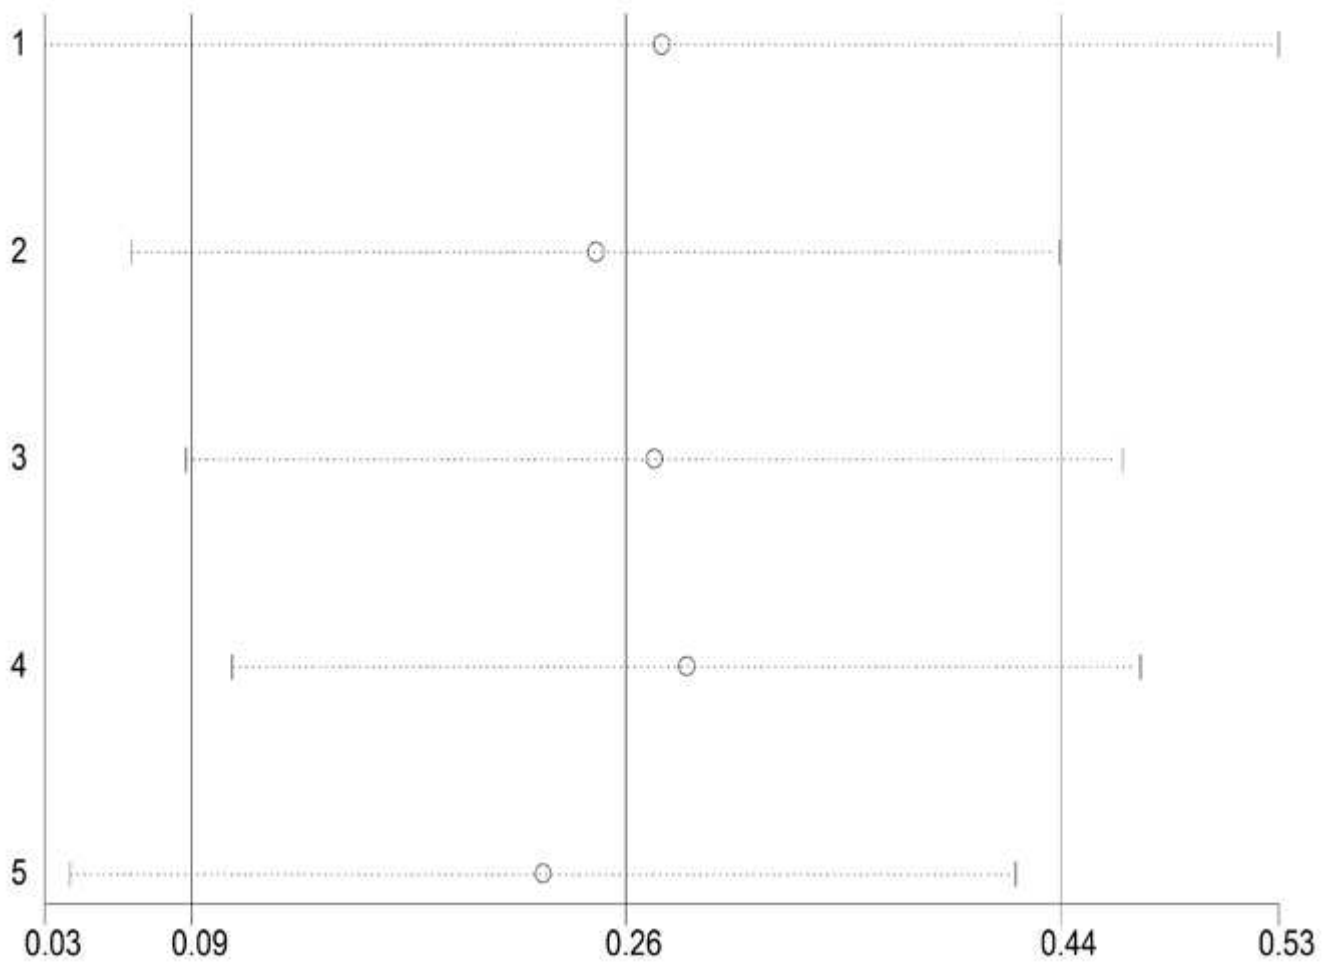

Supplement: bmjopen-2020-041393supp004.pdf [file bmjopen-2020-041393supp004.pdf]

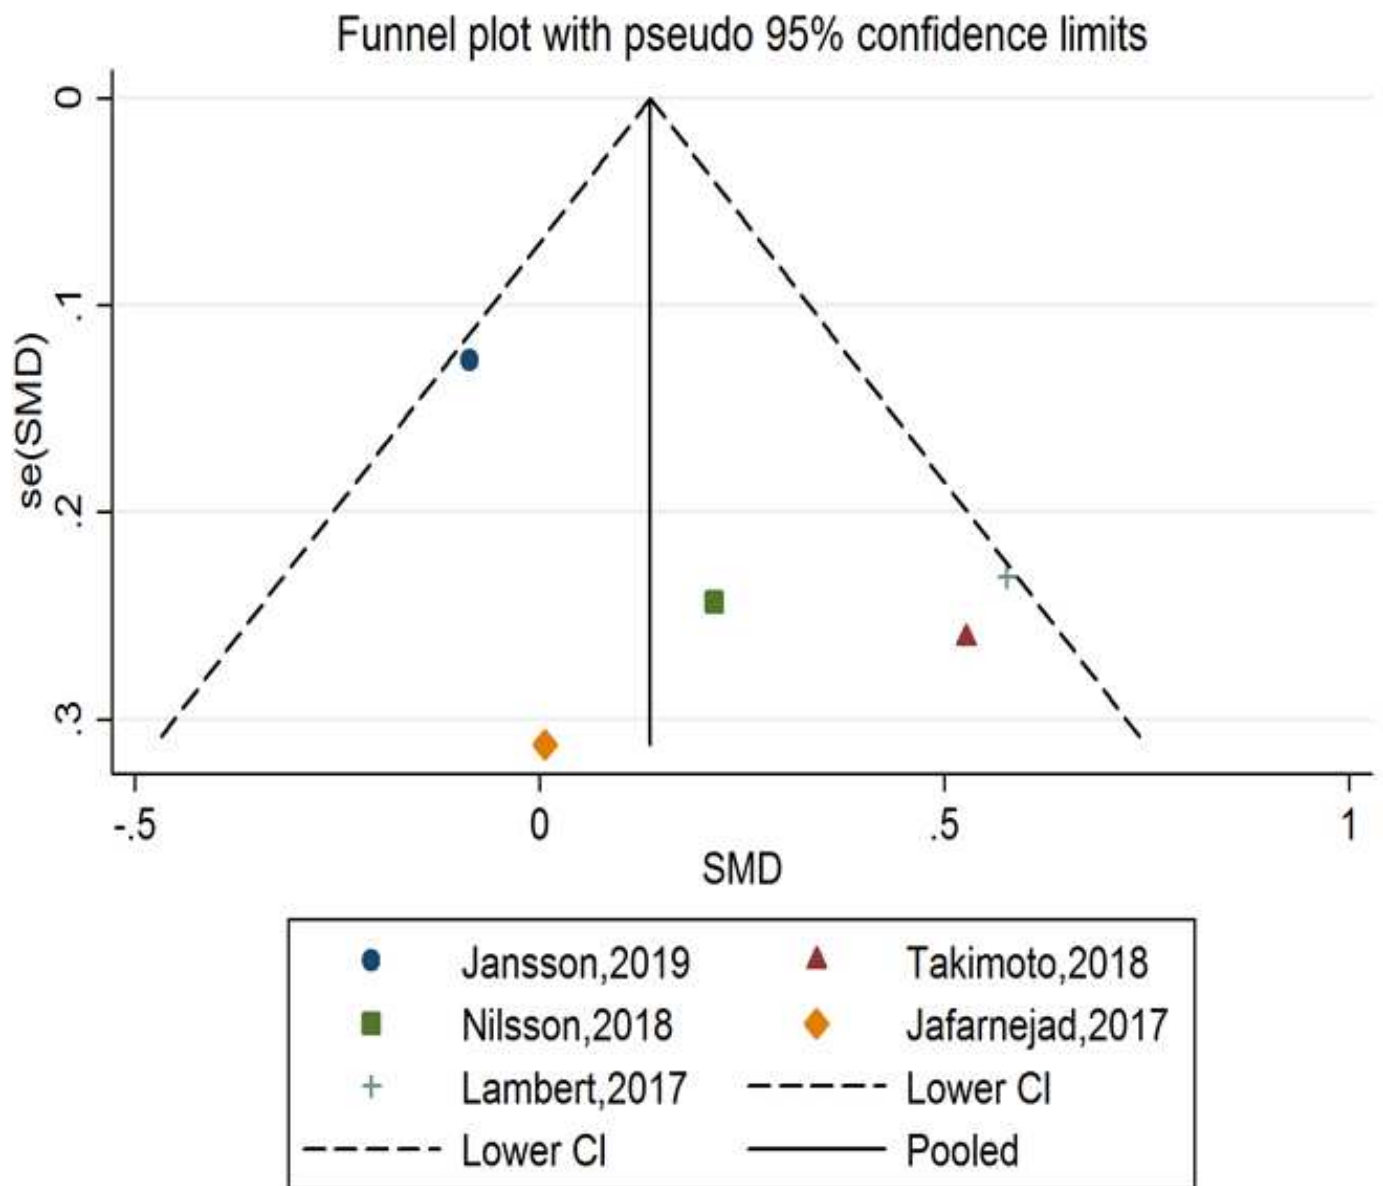

Supplement: bmjopen-2020-041393supp005.pdf [file bmjopen-2020-041393supp005.pdf]
